# Supplementary material for: Differencing as a method to estimate the uncertainty of a transient LA-ICPMS signal
Source: Royal Society of Chemistry journal article supplement (doi:10.1039/c4ja00004h), 2014-01-01

### Abbe test

This is a statistical test aimed at detecting a trend in a series of (independent and normally distributed) values  $x_1, x_2, \dots, x_n$ . The null hypothesis is that there is no such trend, i.e. that all values  $x_i$  fluctuate around the same mean value  $\mu$  (i.e., they have the same mathematical expectations):

$$H_0: \mu_1 = \mu_2 = \dots = \mu_n = \mu$$

The null hypothesis is tested against the alternative hypothesis stating that a trend is present:

$$\mu_{i+1} \neq \mu_i \text{ for at least some } i \in 1..n$$

To reject the null hypothesis by error means to conclude that a trend exists when it is actually absent. Such error is called  $\alpha$ -type error. To accept the null hypothesis by error means to wrongly decide that there is no trend, while actually a trend exists. Such error is called  $\beta$ -type error and characterises the power of the test. The higher is the power (i.e. the lower is the probability of  $\beta$ -type error), the better.

Let us introduce a new parameter

$$r = \frac{\sum_{i=1}^{n-1} (x_{i+1} - x_i)^2}{2 \sum_{i=1}^n (x_i - \bar{x})^2}, \text{ where } \bar{x} = \frac{\sum_{i=1}^n x_i}{n}$$

Parameter  $r$  can be understood as a ratio of two estimates of the mean intensity variance - obtained by differencing the successive  $x_i$  values in the numerator and by the commonly used approach to the uncertainty of the mean for non-transient data in the denominator. The latter approach does not account for a trend in the mean values (mathematical expectations) of  $x_i$ . Consequently,  $r$  values below unity are expected in the presence of a trend, and the stronger it is, the lower is the corresponding value of  $r$ .

At  $n \geq 20$  the statistics of  $r$  is approximately normal, centred around unity, provided the null hypothesis postulating the absence of trend holds true. In the table below, critical values of  $r$  for  $n \leq 60$  are given, corresponding to the condition  $\text{probability}(r \leq r_{\text{critical}}) = 0.05$ , or 5%. If, for observations  $x_1, x_2, \dots, x_n$ , we obtain an  $r \leq r_{\text{critical}}$ , this event would be improbable (less than 5% of probability) provided the null hypothesis holds true. Consequently, this hypothesis is rejected and the alternative hypothesis about the presence of a trend is accepted. The error of wrong rejection of the null hypothesis, i.e.  $\alpha$ -type error, amounts to 5% in this example.

| $n$ | $r_{\text{critical}}$ | $n$ | $r_{\text{critical}}$ | $n$ | $r_{\text{critical}}$ |
|-----|-----------------------|-----|-----------------------|-----|-----------------------|
| 10  | 0.531                 | 27  | 0.695                 | 44  | 0.758                 |
| 11  | 0.548                 | 28  | 0.700                 | 45  | 0.760                 |
| 12  | 0.564                 | 29  | 0.705                 | 46  | 0.763                 |
| 13  | 0.578                 | 30  | 0.709                 | 47  | 0.765                 |
| 14  | 0.591                 | 31  | 0.714                 | 48  | 0.777                 |
| 15  | 0.603                 | 32  | 0.718                 | 49  | 0.770                 |
| 16  | 0.614                 | 33  | 0.722                 | 50  | 0.772                 |
| 17  | 0.624                 | 34  | 0.726                 | 51  | 0.774                 |
| 18  | 0.633                 | 35  | 0.729                 | 52  | 0.776                 |
| 19  | 0.542                 | 36  | 0.733                 | 53  | 0.778                 |
| 20  | 0.650                 | 37  | 0.736                 | 54  | 0.780                 |
| 21  | 0.657                 | 38  | 0.740                 | 55  | 0.782                 |
| 22  | 0.665                 | 39  | 0.743                 | 56  | 0.784                 |
| 23  | 0.671                 | 40  | 0.746                 | 57  | 0.785                 |
| 24  | 0.678                 | 41  | 0.749                 | 58  | 0.787                 |
| 25  | 0.684                 | 42  | 0.752                 | 59  | 0.789                 |
| 26  | 0.689                 | 43  | 0.755                 | 60  | 0.791                 |

For  $n > 60$ , at  $\alpha = 5\%$ , the following approximation applies:  $r_{\text{critical}} = 1 - 1.645 \sqrt{\frac{n-2}{(n-1)(n+1)}}$

The power of tests for the presence of trend generally increases with the number of observation  $n$  and depends on the specific pattern of the trend (linear or not, which slope if linear). The Abbe test belongs to the most power tests for the presence of trend.

- (1) Yu. V. Linnik, *Method of least squares and principles of the theory of observations*. Pergamon Press, New York-Oxford-London-Paris, 1961, 360 p.
- (2) S.B. Lemeshko, *Measurement Techniques*. 2006, **49**, 962-969.

Ce<sup>140+</sup> signal, spot ablation of the standard glass NIST612 at a repetition rate of 15 Hz, beam size of 75 mkm and on-sample energy density of 4.5 J/cm<sup>2</sup>

**ABBE TEST DETECTS A TREND IN THE SERIES OF INTENSITY DIFFERENCES**

| Original intensity data and their differencing |              |                 |                                                                                |                                         | Abbe test for the series of intensity differences                     |                                    |
|------------------------------------------------|--------------|-----------------|--------------------------------------------------------------------------------|-----------------------------------------|-----------------------------------------------------------------------|------------------------------------|
| time                                           | sweep number | intensity (cps) | number of intensity difference                                                 | intensity differences $I_{2i-1}-I_{2i}$ | difference of difference $(I_{2i-1}-I_{2i})-(I_{2i-1}-I_{2i})_{mean}$ | square of difference of difference |
| 81.7                                           | 1            | 1041891         | 1                                                                              | 62144                                   | 2022026430                                                            | 2261448256                         |
| 84.2                                           | 2            | 979747          | 2                                                                              | 109699                                  | 8560252979                                                            | 8796446863                         |
| 86.6                                           | 3            | 939667          | 3                                                                              | 15909                                   | 1607164                                                               | 563652887                          |
| 89.0                                           | 4            | 829968          | 4                                                                              | 39651                                   | 505064279                                                             | 566187153                          |
| 91.4                                           | 5            | 898389          | 5                                                                              | 15856                                   | 1745179                                                               | 2316045703                         |
| 93.8                                           | 6            | 882480          | 6                                                                              | 63981                                   | 2190638773                                                            | 4065329630                         |
| 96.2                                           | 7            | 814392          | 7                                                                              | 221                                     | 287494993                                                             | 2113051278                         |
| 98.6                                           | 8            | 774741          | 8                                                                              | 46189                                   | 841711242                                                             | 476926909                          |
| 101.0                                          | 9            | 743821          | 9                                                                              | 24351                                   | 51460593                                                              | 268609564                          |
| 103.4                                          | 10           | 727965          | 10                                                                             | 7961                                    | 84929285                                                              | 420415295                          |
| 105.9                                          | 11           | 723885          | 11                                                                             | -12543                                  | 883262934                                                             | 170007372                          |
| 108.3                                          | 12           | 659904          | 12                                                                             | 496                                     | 278257506                                                             | 494024246                          |
| 110.7                                          | 13           | 627699          | 13                                                                             | 22723                                   | 30753723                                                              | 721387413                          |
| 113.1                                          | 14           | 627477          | 14                                                                             | -4136                                   | 454246199                                                             | 984371016                          |
| 115.5                                          | 15           | 604149          | 15                                                                             | 27239                                   | 101236503                                                             | 254594932                          |
| 117.9                                          | 16           | 557960          | 16                                                                             | 11283                                   | 34743904                                                              | 4340321                            |
| 120.3                                          | 17           | 536829          | 17                                                                             | 13366                                   | 14524120                                                              | 117447680                          |
| 122.7                                          | 18           | 512479          | 18                                                                             | 2529                                    | 214575048                                                             | 527192454                          |
| 125.1                                          | 19           | 492396          | 19                                                                             | 25489                                   | 69094190                                                              | 166720149                          |
| 127.5                                          | 20           | 484435          | 20                                                                             | 12577                                   | 21157463                                                              | 516682731                          |
| 130.0                                          | 21           | 465383          | 21                                                                             | -10153                                  | 746949693                                                             | 78334115                           |
| 132.4                                          | 22           | 477925          | 22                                                                             | -1303                                   | 341500207                                                             | 76714058                           |
| 134.8                                          | 23           | 435748          | 23                                                                             | -10061                                  | 741929367                                                             | 349142073                          |
| 137.2                                          | 24           | 435252          | 24                                                                             | -28747                                  | 2108988445                                                            | 192691706                          |
| 139.6                                          | 25           | 392008          | 25                                                                             | -14865                                  | 1026714142                                                            | 1731614463                         |
| 142.0                                          | 26           | 369285          | 26                                                                             | 26747                                   | 91590479                                                              |                                    |
| 144.4                                          | 27           | 363413          | sum                                                                            | <b>17177</b>                            | <b>21706454838</b>                                                    | <b>28233378267</b>                 |
| 146.8                                          | 28           | 367549          |                                                                                |                                         |                                                                       |                                    |
| 149.2                                          | 29           | 353005          |                                                                                |                                         |                                                                       |                                    |
| 151.6                                          | 30           | 325767          | <i>r</i> calculated                                                            |                                         |                                                                       | <b>0.650</b>                       |
| 154.1                                          | 31           | 292795          | <i>r</i> critical                                                              |                                         |                                                                       | <b>0.689</b>                       |
| 156.5                                          | 32           | 281512          | A trend is present if <i>r</i> calculated is below this value (95% cnf. level) |                                         |                                                                       |                                    |
| 158.9                                          | 33           | 270354          |                                                                                |                                         |                                                                       |                                    |
| 161.3                                          | 34           | 256988          |                                                                                |                                         |                                                                       |                                    |
| 163.7                                          | 35           | 244592          |                                                                                |                                         |                                                                       |                                    |
| 166.1                                          | 36           | 242063          |                                                                                |                                         |                                                                       |                                    |
| 168.5                                          | 37           | 246461          |                                                                                |                                         |                                                                       |                                    |
| 170.9                                          | 38           | 220971          |                                                                                |                                         |                                                                       |                                    |
| 173.3                                          | 39           | 232571          |                                                                                |                                         |                                                                       |                                    |
| 175.7                                          | 40           | 219994          |                                                                                |                                         |                                                                       |                                    |
| 178.2                                          | 41           | 226976          |                                                                                |                                         |                                                                       |                                    |
| 180.6                                          | 42           | 237129          |                                                                                |                                         |                                                                       |                                    |
| 183.0                                          | 43           | 176046          |                                                                                |                                         |                                                                       |                                    |
| 185.4                                          | 44           | 177349          |                                                                                |                                         |                                                                       |                                    |
| 187.8                                          | 45           | 182934          |                                                                                |                                         |                                                                       |                                    |
| 190.2                                          | 46           | 192995          |                                                                                |                                         |                                                                       |                                    |
| 192.6                                          | 47           | 167632          |                                                                                |                                         |                                                                       |                                    |
| 195.0                                          | 48           | 196379          |                                                                                |                                         |                                                                       |                                    |
| 197.4                                          | 49           | 174735          |                                                                                |                                         |                                                                       |                                    |
| 199.8                                          | 50           | 189600          |                                                                                |                                         |                                                                       |                                    |
| 202.3                                          | 51           | 165173          |                                                                                |                                         |                                                                       |                                    |
| 204.7                                          | 52           | 138425          |                                                                                |                                         |                                                                       |                                    |

**Intensity differences (cps) for successive sweeps vs. sweep number, Ce<sup>140+</sup>**

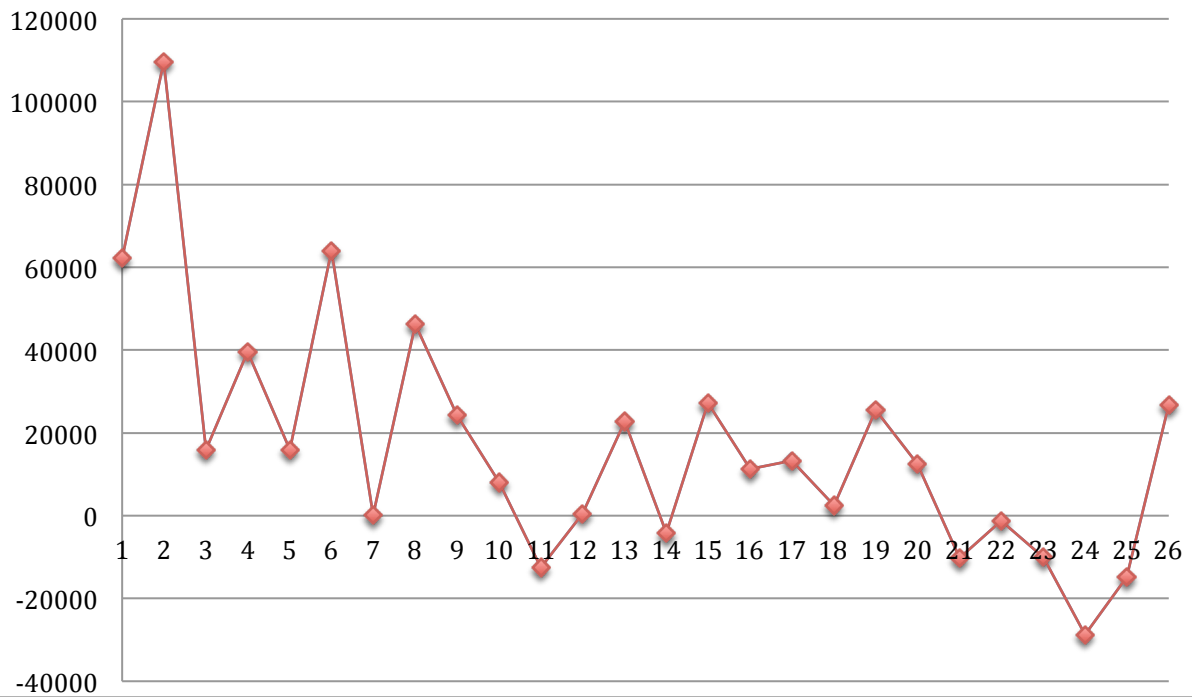

**Individual sweep intensities (cps) vs. sweep number, Ce<sup>140+</sup>**

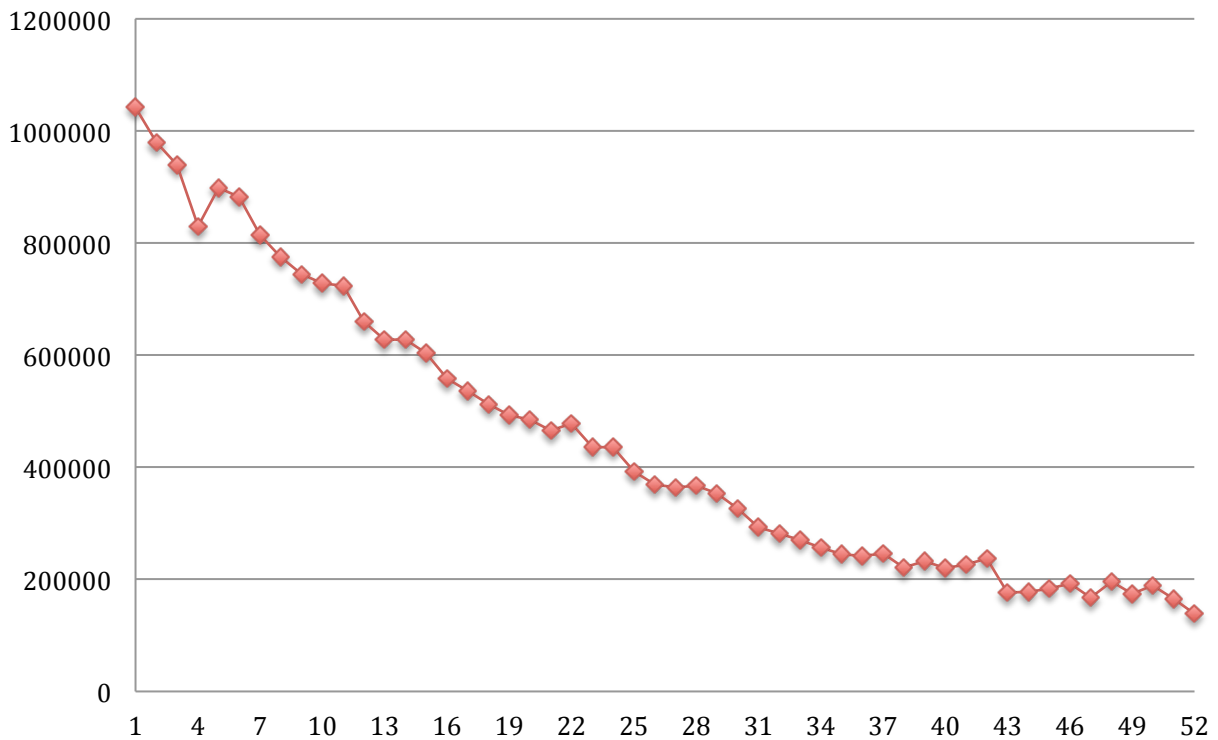

V<sup>51+</sup> signal, spot ablation of the standard glass NIST612 at a repetition rate of 15 Hz, beam size of 75 mkm and on-sample energy density of 4.5 J/cm<sup>2</sup>

**ABBE TEST DOES NOT DETECT A TREND IN THE SERIES OF INTENSITY DIFFERENCES**

| Original intensity data and their differencing |              |                 |                                |                                         | Abbe test for the series of intensity differences                     |                                    |
|------------------------------------------------|--------------|-----------------|--------------------------------|-----------------------------------------|-----------------------------------------------------------------------|------------------------------------|
| time                                           | sweep number | intensity (cps) | number of intensity difference | intensity differences $I_{2i-1}-I_{2i}$ | difference of difference $(I_{2i-1}-I_{2i})-(I_{2i-1}-I_{2i})_{mean}$ | square of difference of difference |
| 81.7                                           | 1            | 404352          | 1                              | 7014                                    | 31981743.81                                                           | 1707342400                         |
| 84.2                                           | 2            | 397338          | 2                              | 48334                                   | 1271975078                                                            | 986085604                          |
| 86.6                                           | 3            | 372250          | 3                              | 16932                                   | 18171119.54                                                           | 1327104                            |
| 89.0                                           | 4            | 323916          | 4                              | 15780                                   | 9676825.385                                                           | 344547844                          |
| 91.4                                           | 5            | 345618          | 5                              | -2782                                   | 238740829.4                                                           | 1095212836                         |
| 93.8                                           | 6            | 328686          | 6                              | 30312                                   | 311266966.8                                                           | 768065796                          |
| 96.2                                           | 7            | 316432          | 7                              | 2598                                    | 101429882.9                                                           | 148644864                          |
| 98.6                                           | 8            | 300652          | 8                              | 14790                                   | 4497621.346                                                           | 147549609                          |
| 101.0                                          | 9            | 291746          | 9                              | 2643                                    | 100525496.3                                                           | 450458176                          |
| 103.4                                          | 10           | 294528          | 10                             | 23867                                   | 125389820.4                                                           | 14227984                           |
| 105.9                                          | 11           | 286732          | 11                             | 27639                                   | 224093702.9                                                           | 72097081                           |
| 108.3                                          | 12           | 256420          | 12                             | 19148                                   | 41974326.15                                                           | 195300625                          |
| 110.7                                          | 13           | 241105          | 13                             | 5173                                    | 56193619.9                                                            | 92833225                           |
| 113.1                                          | 14           | 238507          | 14                             | -4462                                   | 293479397.1                                                           | 184538640.3                        |
| 115.5                                          | 15           | 234223          | 15                             | 9122.5                                  | 12579367.36                                                           | 33907329                           |
| 117.9                                          | 16           | 219433          | 16                             | 14945.5                                 | 5181357.837                                                           | 720801                             |
| 120.3                                          | 17           | 222644          | 17                             | 15794.5                                 | 9767247.664                                                           | 39325441                           |
| 122.7                                          | 18           | 220001          | 18                             | 22065.5                                 | 88289694.76                                                           | 42074682.25                        |
| 125.1                                          | 19           | 203440          | 19                             | 15579                                   | 8466701.019                                                           | 257049                             |
| 127.5                                          | 20           | 179573          | 20                             | 15072                                   | 5773253.769                                                           | 958645444                          |
| 130.0                                          | 21           | 179473          | 21                             | -15890                                  | 815630211.3                                                           | 1664313616                         |
| 132.4                                          | 22           | 151834          | 22                             | 24906                                   | 149738285.9                                                           | 864565812.3                        |
| 134.8                                          | 23           | 170880          | 23                             | -4497.5                                 | 294696975.4                                                           | 13601344                           |
| 137.2                                          | 24           | 151732          | 24                             | -8185.5                                 | 434920196.5                                                           | 374451525.6                        |
| 139.6                                          | 25           | 143203          | 25                             | 11165.25                                | 2261987.077                                                           | 124807998.1                        |
| 142.0                                          | 26           | 138030          | 26                             | 22337                                   | 93465575.98                                                           |                                    |
| 144.4                                          | 27           | 138335          |                                | <b>12669</b>                            | <b>4750167285</b>                                                     | <b>10324902830</b>                 |
| 146.8                                          | 28           | 142797          |                                |                                         |                                                                       |                                    |
| 149.2                                          | 29           | 135138          |                                |                                         |                                                                       |                                    |
| 151.6                                          | 30           | 126015.5        |                                |                                         |                                                                       |                                    |
| 154.1                                          | 31           | 122972          |                                |                                         |                                                                       |                                    |
| 156.5                                          | 32           | 108026.5        |                                |                                         |                                                                       |                                    |
| 158.9                                          | 33           | 111065.5        |                                |                                         |                                                                       |                                    |
| 161.3                                          | 34           | 95271           |                                |                                         |                                                                       |                                    |
| 163.7                                          | 35           | 108685          |                                |                                         |                                                                       |                                    |
| 166.1                                          | 36           | 86619.5         |                                |                                         |                                                                       |                                    |
| 168.5                                          | 37           | 94412           |                                |                                         |                                                                       |                                    |
| 170.9                                          | 38           | 78833           |                                |                                         |                                                                       |                                    |
| 173.3                                          | 39           | 96081.5         |                                |                                         |                                                                       |                                    |
| 175.7                                          | 40           | 81009.5         |                                |                                         |                                                                       |                                    |
| 178.2                                          | 41           | 80753.5         |                                |                                         |                                                                       |                                    |
| 180.6                                          | 42           | 96643.5         |                                |                                         |                                                                       |                                    |
| 183.0                                          | 43           | 81310           |                                |                                         |                                                                       |                                    |
| 185.4                                          | 44           | 56404           |                                |                                         |                                                                       |                                    |
| 187.8                                          | 45           | 67209           |                                |                                         |                                                                       |                                    |
| 190.2                                          | 46           | 71706.5         |                                |                                         |                                                                       |                                    |
| 192.6                                          | 47           | 68069           |                                |                                         |                                                                       |                                    |
| 195.0                                          | 48           | 76254.5         |                                |                                         |                                                                       |                                    |
| 197.4                                          | 49           | 74940.5         |                                |                                         |                                                                       |                                    |
| 199.8                                          | 50           | 63775.25        |                                |                                         |                                                                       |                                    |
| 202.3                                          | 51           | 80254           |                                |                                         |                                                                       |                                    |
| 204.7                                          | 52           | 57917           |                                |                                         |                                                                       |                                    |

  

|                                                                                |              |
|--------------------------------------------------------------------------------|--------------|
| <i>r</i> calculated                                                            | <b>1.087</b> |
| <i>r</i> critical                                                              | <b>0.689</b> |
| A trend is present if <i>r</i> calculated is below this value (95% cnf. level) |              |

**Intensity differences (cps) for successive sweeps vs. sweep number,  $V^{51+}$**

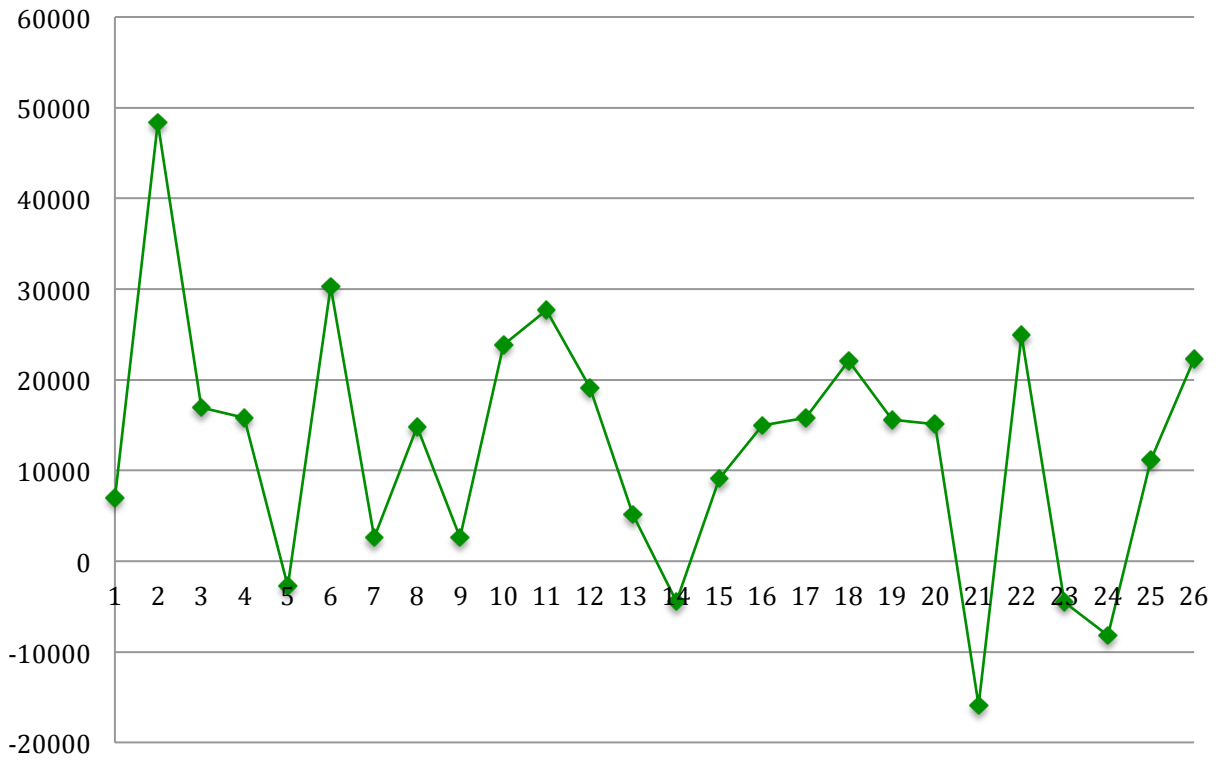

**Individual sweep intensities (cps) vs. sweep number,  $V^{51+}$**

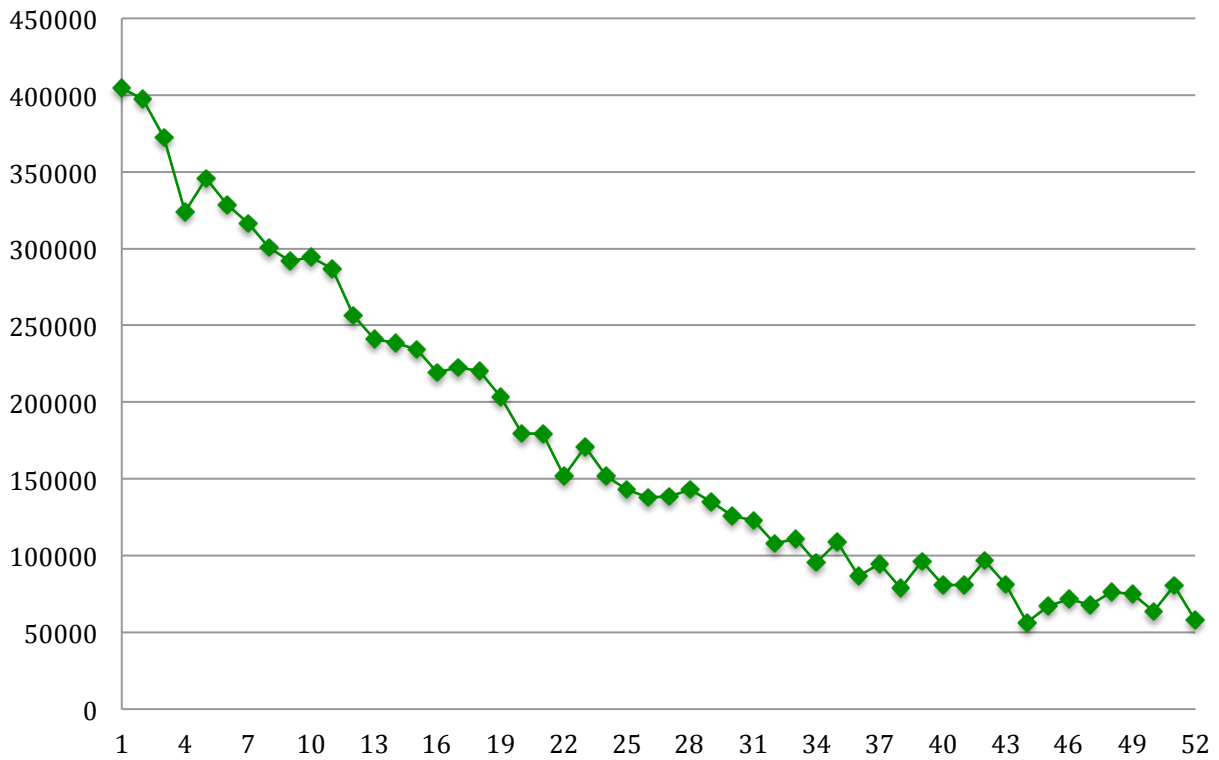

Supplement: c4ja00004h6.pdf [file c4ja00004h6.pdf]
