# Supplementary material for: Differencing as a method to estimate the uncertainty of a transient LA-ICPMS signal
Source: Royal Society of Chemistry journal article supplement (doi:10.1039/c4ja00004h), 2014-01-01
Supplement: c4ja00004h3.pdf [file c4ja00004h3.pdf]

Table 1. Calculation of  $s(I_{mean})$  for a non-transient signal using formulae (9) and (14).  
 The NIST SRM 612 glass standard was ablated using a linear rastering of the laser beam;  
 see Electronic Appendix 4 for the original data and calculus.

| Sweep<br>number | $U^{238}$          |                         |                          |                        |                             |
|-----------------|--------------------|-------------------------|--------------------------|------------------------|-----------------------------|
|                 | $I_i$ , cps        | $I_{2i-1}$ , cps        | $I_{2i}$ , cps           | $I_{2i-1}I_{2i}$ , cps | $(I_{2i-1}I_{2i})^2$ , cps  |
|                 | original<br>signal | odd sweeps,<br>series a | even sweeps,<br>series b | exact<br>formula (14)  | approximate<br>formula (14) |
| 1               | 2633767            | 2633767                 | 2510029                  | 123738                 | 15311030775                 |
| 2               | 2510029            |                         |                          |                        |                             |
| 3               | 2784576            | 2784576                 | 2558131                  | 226445                 | 51277224803                 |
| 4               | 2558131            |                         |                          |                        |                             |
| 5               | 2432935            | 2432935                 | 2593831                  | -160896                | 25887522816                 |
| 6               | 2593831            |                         |                          |                        |                             |
| .....           |                    |                         |                          |                        |                             |
| 231             | 2662311            | 2662311                 | 2776435                  | -114125                | 13024458563                 |
| 232             | 2776435            |                         |                          |                        |                             |
| $s(I_{mean})$   | <b>6334</b>        |                         |                          | <b>6806</b>            | <b>6807</b>                 |

Table 2. Calculation of  $s(I_{mean})$  for a transient signal using formulae (9) and (14). The GJ-1 zircon standard was ablated in the spot regime; see Electronic Appendix 4 for  
 the original data and calculus.

| Sweep<br>number | $U^{238}$          |                         |                          |                        |                             | $Pb^{206}$         |                         |                          |                        |                             |
|-----------------|--------------------|-------------------------|--------------------------|------------------------|-----------------------------|--------------------|-------------------------|--------------------------|------------------------|-----------------------------|
|                 | $I_i$ , cps        | $I_{2i-1}$ , cps        | $I_{2i}$ , cps           | $I_{2i-1}I_{2i}$ , cps | $(I_{2i-1}I_{2i})^2$ , cps  | $I_i$ , cps        | $I_{2i-1}$ , cps        | $I_{2i}$ , cps           | $I_{2i-1}I_{2i}$ , cps | $(I_{2i-1}I_{2i})^2$ , cps  |
|                 | original<br>signal | odd sweeps,<br>series a | even sweeps,<br>series b | exact<br>formula (14)  | approximate<br>formula (14) | original<br>signal | odd sweeps,<br>series a | even sweeps,<br>series b | exact<br>formula (14)  | approximate<br>formula (14) |
| 1               | 802965             | 802965                  | 787779                   | 15186                  | 230620291                   | 4739               | 4739                    | 5445                     | -706                   | 498436                      |
| 2               | 787779             |                         |                          |                        |                             | 5445               |                         |                          |                        |                             |
| 3               | 763097             | 763097                  | 757406                   | 5690                   | 32378234                    | 5243               | 5243                    | 3932                     | 1311                   | 1718721                     |
| 4               | 757406             |                         |                          |                        |                             | 3932               |                         |                          |                        |                             |
| 5               | 878896             | 878896                  | 882665                   | -3769                  | 14202063                    | 2924               | 2924                    | 4134                     | -1210                  | 1464100                     |
| 6               | 882665             |                         |                          |                        |                             | 4134               |                         |                          |                        |                             |
| .....           |                    |                         |                          |                        |                             |                    |                         |                          |                        |                             |
| 611             | 706158             | 706158                  | 696662                   | 9496                   | 90175203                    | 4336               | 4336                    | 3831                     | 505                    | 255025                      |
| 612             | 696662             |                         |                          |                        |                             | 3831               |                         |                          |                        |                             |
| $s(I_{mean})$   | <b>3720</b>        |                         |                          | <b>2185</b>            | <b>2191</b>                 | <b>38.4</b>        |                         |                          | <b>36.4</b>            | <b>36.5</b>                 |

Table 3. Calculation of the uncertainty of mean intensities and their ratios for a replicate series of transient signals using formulae (7,14,16) applied to the individual replicates; these uncertainties are compared to the uncertainty values computed over the whole set of replicates. The NIST SRM 610 glass standard was ablated in the spot regime; see Electronic Appendix 4 for the original data and calculus.

| Analysis number                  | Hg <sup>201</sup> &           |                            | Pb <sup>204</sup>             |                            | Pb <sup>206</sup>             |                            | Pb <sup>207</sup>             |                            | Pb <sup>208</sup>             |                            | Th <sup>232</sup>             |                            | U <sup>235</sup>              |                            | U <sup>238</sup>              |                            | Pb <sup>206</sup> /U <sup>238</sup>      |                                             |                 | Pb <sup>207</sup> /U <sup>235</sup> |                  |                                          |                                             |                 |               |                  |
|----------------------------------|-------------------------------|----------------------------|-------------------------------|----------------------------|-------------------------------|----------------------------|-------------------------------|----------------------------|-------------------------------|----------------------------|-------------------------------|----------------------------|-------------------------------|----------------------------|-------------------------------|----------------------------|------------------------------------------|---------------------------------------------|-----------------|-------------------------------------|------------------|------------------------------------------|---------------------------------------------|-----------------|---------------|------------------|
|                                  | <i>I<sub>mean</sub></i> , cps | <i>s(I<sub>mean</sub>)</i> | <i>I<sup>Pb206</sup>/U<sup>238</sup></i> | <i>s(I<sup>Pb206</sup>/U<sup>238</sup>)</i> | from replicates | with Cov term                       | without Cov term | <i>I<sup>Pb207</sup>/U<sup>235</sup></i> | <i>s(I<sup>Pb207</sup>/U<sup>235</sup>)</i> | from replicates | with Cov term | without Cov term |
|                                  | <i>ind. signal</i>            |                            | <i>ind. signal</i>            |                            | <i>ind. signal</i>            |                            | <i>ind. signal</i>            |                            | <i>ind. signal</i>            |                            | <i>ind. signal</i>            |                            | <i>ind. signal</i>            |                            | <i>ind. signal</i>            |                            |                                          |                                             |                 |                                     |                  |                                          |                                             |                 |               |                  |
| 1                                | 266                           | 19                         | 34441                         | 312                        | 585999                        | 3517                       | 543356                        | 3347                       | 1277444                       | 9711                       | 2250294                       | 13772                      | 5582                          | 81                         | 2329941                       | 14863                      | 0.2515                                   | 0.0024                                      | 0.0022          | 97.3                                | 1.6              | 1.5                                      |                                             |                 |               |                  |
| 2                                | 248                           | 20                         | 34106                         | 398                        | 584144                        | 3908                       | 543837                        | 3641                       | 1286636                       | 10313                      | 2249674                       | 14220                      | 5374                          | 87                         | 2307011                       | 14953                      | 0.2532                                   | 0.0028                                      | 0.0024          | 101.2                               | 1.9              | 1.8                                      |                                             |                 |               |                  |
| 3                                | 279                           | 24                         | 34272                         | 303                        | 583413                        | 3992                       | 540021                        | 3698                       | 1287634                       | 9178                       | 2281934                       | 13947                      | 5496                          | 83                         | 2309488                       | 15143                      | 0.2526                                   | 0.0025                                      | 0.0024          | 98.3                                | 1.6              | 1.6                                      |                                             |                 |               |                  |
| 4                                | 251                           | 23                         | 34009                         | 341                        | 575752                        | 4226                       | 534272                        | 3060                       | 1268276                       | 9342                       | 2269933                       | 12811                      | 5514                          | 67                         | 2319751                       | 14547                      | 0.2482                                   | 0.0024                                      | 0.0024          | 96.9                                | 1.2              | 1.3                                      |                                             |                 |               |                  |
| 5                                | 278                           | 22                         | 33678                         | 319                        | 588080                        | 3898                       | 543002                        | 4204                       | 1283199                       | 10608                      | 2273682                       | 14283                      | 5562                          | 87                         | 2306908                       | 13993                      | 0.2549                                   | 0.0025                                      | 0.0023          | 97.6                                | 1.7              | 1.7                                      |                                             |                 |               |                  |
| 6                                | 233                           | 20                         | 33651                         | 318                        | 580124                        | 4072                       | 537417                        | 3373                       | 1273514                       | 8875                       | 2288806                       | 14163                      | 5647                          | 88                         | 2319387                       | 13470                      | 0.2501                                   | 0.0023                                      | 0.0023          | 95.2                                | 1.7              | 1.6                                      |                                             |                 |               |                  |
| 7                                | 247                           | 19                         | 33335                         | 304                        | 583659                        | 4367                       | 544789                        | 2910                       | 1296879                       | 8020                       | 2295803                       | 13322                      | 5599                          | 81                         | 2325778                       | 13921                      | 0.2510                                   | 0.0027                                      | 0.0024          | 97.3                                | 1.5              | 1.5                                      |                                             |                 |               |                  |
| 8                                | 241                           | 21                         | 33903                         | 324                        | 581415                        | 4048                       | 541415                        | 3751                       | 1286113                       | 8864                       | 2299796                       | 15489                      | 5660                          | 81                         | 2313433                       | 13719                      | 0.2513                                   | 0.0025                                      | 0.0023          | 95.7                                | 1.5              | 1.5                                      |                                             |                 |               |                  |
| 9                                | 230                           | 17                         | 34575                         | 283                        | 596835                        | 4377                       | 547105                        | 3956                       | 1277660                       | 10667                      | 2288492                       | 15631                      | 5474                          | 82                         | 2309234                       | 15002                      | 0.2585                                   | 0.0029                                      | 0.0025          | 99.9                                | 1.7              | 1.7                                      |                                             |                 |               |                  |
| 10                               | 239                           | 19                         | 33671                         | 338                        | 584171                        | 4928                       | 538105                        | 3743                       | 1267449                       | 9005                       | 2257917                       | 13648                      | 5564                          | 89                         | 2309379                       | 13856                      | 0.2530                                   | 0.0031                                      | 0.0026          | 96.7                                | 1.5              | 1.7                                      |                                             |                 |               |                  |
| 11                               | 232                           | 16                         | 33903                         | 339                        | 581470                        | 4244                       | 537686                        | 3601                       | 1277235                       | 8510                       | 2287589                       | 13528                      | 5541                          | 72                         | 2313932                       | 14917                      | 0.2513                                   | 0.0028                                      | 0.0024          | 97                                  | 1.5              | 1.4                                      |                                             |                 |               |                  |
| 12                               | 258                           | 20                         | 33788                         | 350                        | 588646                        | 4633                       | 546716                        | 3850                       | 1281708                       | 11529                      | 2302790                       | 14689                      | 5452                          | 85                         | 2333547                       | 15544                      | 0.2523                                   | 0.0027                                      | 0.0026          | 100.3                               | 1.8              | 1.7                                      |                                             |                 |               |                  |
| 13                               | 218                           | 18                         | 33567                         | 335                        | 575402                        | 4231                       | 530313                        | 4066                       | 1246374                       | 11233                      | 2270065                       | 17539                      | 5535                          | 98                         | 2314539                       | 15332                      | 0.2486                                   | 0.0025                                      | 0.0025          | 95.8                                | 1.8              | 1.8                                      |                                             |                 |               |                  |
| 14                               | 240                           | 20                         | 34355                         | 386                        | 586180                        | 4322                       | 543948                        | 3872                       | 1275205                       | 10244                      | 2304594                       | 16440                      | 5432                          | 79                         | 2317737                       | 14343                      | 0.2529                                   | 0.0026                                      | 0.0024          | 100.1                               | 1.6              | 1.6                                      |                                             |                 |               |                  |
| 15                               | 244                           | 21                         | 34328                         | 331                        | 581654                        | 3509                       | 532495                        | 3578                       | 1259835                       | 9793                       | 2276497                       | 15631                      | 5394                          | 82                         | 2299881                       | 16754                      | 0.2529                                   | 0.0027                                      | 0.0024          | 98.7                                | 1.7              | 1.6                                      |                                             |                 |               |                  |
| 16                               | 229                           | 20                         | 34212                         | 309                        | 583663                        | 4272                       | 539441                        | 2931                       | 1267877                       | 8864                       | 2287178                       | 13537                      | 5569                          | 78                         | 2330911                       | 14223                      | 0.2504                                   | 0.0028                                      | 0.0024          | 96.9                                | 1.5              | 1.5                                      |                                             |                 |               |                  |
| 17                               | 206                           | 19                         | 34009                         | 289                        | 586326                        | 4246                       | 543531                        | 3508                       | 1272854                       | 9963                       | 2301613                       | 14345                      | 5466                          | 87                         | 2350088                       | 13911                      | 0.2495                                   | 0.0026                                      | 0.0023          | 99.4                                | 1.8              | 1.7                                      |                                             |                 |               |                  |
| 18                               | 245                           | 20                         | 34011                         | 307                        | 585924                        | 4293                       | 541352                        | 3577                       | 1268185                       | 9994                       | 2297838                       | 16838                      | 5553                          | 86                         | 2354143                       | 14868                      | 0.2489                                   | 0.0025                                      | 0.0024          | 97.5                                | 1.6              | 1.6                                      |                                             |                 |               |                  |
| <i>s(I<sub>mean</sub>) repl.</i> | 19                            | 20                         | 336                           | 327                        | 4832                          | 4171                       | 4728                          | 3593                       | 11587                         | 9706                       | 17566                         | 14658                      | 80                            | 83                         | 14760                         | 14631                      | 0.0025                                   | 0.0026                                      | 0.0024          | 1.7                                 | 1.6              | 1.6                                      |                                             |                 |               |                  |
| <i>s(s(I<sub>mean</sub>))*</i>   |                               | 2                          |                               | 30                         |                               | 343                        |                               | 363                        |                               | 955                        |                               | 1318                       |                               | 7                          |                               | 804                        |                                          | 0.0002                                      | 0.0001          |                                     | 0.2              | 0.1                                      |                                             |                 |               |                  |

<sup>2</sup> Hg<sup>201</sup> demonstrates a weak non-transient background noise not changing during the ablation; all other isotopes yield transient signals in a range of intensities reflecting their respective isotope abundances;

\* Uncertainty of the uncertainty values of mean intensities and their ratios estimated from the individual signals.
