# Supplementary material for: Differencing as a method to estimate the uncertainty of a transient LA-ICPMS signal
Source: Royal Society of Chemistry journal article supplement (doi:10.1039/c4ja00004h), 2014-01-01
Supplement: c4ja00004h4.xlsx [file c4ja00004h4.xlsx]

## Sheet: non-transient signal
	NON-TRANSIENT SIGNAL
	Original data					Calculations					The original data were acquired using an Element XR sector-field ICPMS interfaced to an UP-193FX laser ablation system.
	Trace for Mass:	U235(LR)	U238(LR)		Sweep	U238					The NIST 612 standard glass was ablated using a linear ratering of the beam at a repetition rate of 20 Hz, 75 mkm beam size and 5.0 J/cm2 on-sample energy density.
	Resolution:	Low	Low		number	Ii, cps	Ii+1, cps	I2i-1-I2i, cps	(I2i-1-I2i)2, cps		(the data were acquired with the orignal purpose to calibrate the spectrometer dead time using the ratio method)
						odd sweeps,	even sweeps,	exact	approximate
	Time	Intensity	Intensity			series a	series b	formula (14)	formula (14)
	[sec]	[cps]	[cps]
	0.077	6698.4	2.63377e+06		1	2.63377e+06	2.51003e+06	123738	1.5311e+10
	0.152	6377.4	2.51003e+06		2
	0.227	6397.4	2784576		3	2784576	2.55813e+06	226445	5.12772e+10
	0.303	6879	2.55813e+06		4
	0.378	6498	2.43293e+06		5	2.43293e+06	2.59383e+06	-160896	25887522816
	0.453	5976.4	2.59383e+06		6
	0.528	6317.2	2451008		7	2451008	2.55446e+06	-103450	1.07018e+10
	0.604	6678.2	2.55446e+06		8
	0.679	6918.8	2.7514e+06		9	2.7514e+06	2.57896e+06	172442	2.97362e+10
	0.754	7179.4	2.57896e+06		10
	0.829	7159.4	2.5135e+06		11	2.5135e+06	2.51151e+06	1984	3936256
	0.905	5475	2.51151e+06		12
	0.98	6537.6	2.52963e+06		13	2.52963e+06	2704512	-174886	3.05853e+10
	1.055	6618	2704512		14
	1.13	6357.4	2.55156e+06		15	2.55156e+06	2.45391e+06	97651.2	9.53577e+09
	1.205	6878.8	2.45391e+06		16
	1.281	6999	2737280		17	2737280	2.58308e+06	154202	2.37781e+10
	1.356	6958.8	2.58308e+06		18
	1.431	7159.6	2.43832e+06		19	2.43832e+06	2.56814e+06	-129818	1.68526e+10
	1.506	6778.4	2.56814e+06		20
	1.582	6457.4	2.48252e+06		21	2.48252e+06	2.56228e+06	-79757	6361179049
	1.657	6236.8	2.56228e+06		22
	1.732	6517.8	2.64572e+06		23	2.64572e+06	2.51343e+06	132288	17500114944
	1.807	6317.2	2.51343e+06		24
	1.883	6337.2	2.42391e+06		25	2.42391e+06	2.53055e+06	-106637	1.13714e+10
	1.958	6056.6	2.53055e+06		26
	2.033	6638	2.52695e+06		27	2.52695e+06	2.66533e+06	-138381	1.91492e+10
	2.108	7219.6	2.66533e+06		28
	2.184	7340	2.76673e+06		29	2.76673e+06	2.61428e+06	152448	23240392704
	2.259	6899	2.61428e+06		30
	2.334	6377.4	2.5617e+06		31	2.5617e+06	2603456	-41753.5	1.74335e+09
	2.409	6016.6	2603456		32
	2.485	7239.6	2.47588e+06		33	2.47588e+06	2.55543e+06	-79552	6328520704
	2.56	6738.4	2.55543e+06		34
	2.635	6337.4	2.65452e+06		35	2.65452e+06	2.56763e+06	86886.5	7.54926e+09
	2.71	6778.6	2.56763e+06		36
	2.786	7380.2	2743552		37	2743552	2.51781e+06	225741	5.09589e+10
	2.861	7781.2	2.51781e+06		38
	2.936	6617.8	2637376		39	2637376	2.66755e+06	-30169.5	9.10199e+08
	3.011	6156.6	2.66755e+06		40
	3.086	5976.2	2.51151e+06		41	2.51151e+06	2.56924e+06	-57728	3332521984
	3.162	6577.8	2.56924e+06		42
	3.237	6357.2	2.58122e+06		43	2.58122e+06	2.44285e+06	138368	19145703424
	3.312	6818.6	2.44285e+06		44
	3.387	6457.4	2.43884e+06		45	2.43884e+06	2.62328e+06	-184448	34021064704
	3.463	6838.6	2.62328e+06		46
	3.538	6257.2	2.42065e+06		47	2.42065e+06	2.75351e+06	-332864	110798442496
	3.613	7199.8	2.75351e+06		48
	3.688	6196.8	2532352		49	2532352	2473472	58880	3466854400
	3.764	6537.8	2473472		50
	3.839	6638.2	2.73546e+06		51	2.73546e+06	2.56526e+06	170202	2.89686e+10
	3.914	6537.8	2.56526e+06		52
	3.989	6558	2.57674e+06		53	2.57674e+06	2.70218e+06	-125440	15735193600
	4.065	6517.8	2.70218e+06		54
	4.14	7380.2	2.50269e+06		55	2.50269e+06	2.6902e+06	-187507	35158875049
	4.215	6557.8	2.6902e+06		56
	4.29	7601	2.66961e+06		57	2.66961e+06	2.54719e+06	122419	1.49865e+10
	4.366	6798.4	2.54719e+06		58
	4.441	7259.8	2.58796e+06		59	2.58796e+06	2.72803e+06	-140070	1.96197e+10
	4.516	6056.4	2.72803e+06		60
	4.591	6617.8	2498368		61	2498368	2604800	-106432	11327770624
	4.667	6277	2604800		62
	4.742	6878.8	2.66001e+06		63	2.66001e+06	2.60605e+06	53952	2910818304
	4.817	7520.4	2.60605e+06		64
	4.892	6878.6	2626624		65	2626624	2.55583e+06	70796.8	5.01218e+09
	4.967	6878.6	2.55583e+06		66
	5.043	6999	2.51958e+06		67	2.51958e+06	2628480	-108902	1.18598e+10
	5.118	6638.2	2628480		68
	5.193	6116.6	2.53782e+06		69	2.53782e+06	2.54904e+06	-11225.8	1.26017e+08
	5.268	6738.4	2.54904e+06		70
	5.344	6517.8	2790208		71	2790208	2.61289e+06	177318	3.14419e+10
	5.419	7661	2.61289e+06		72
	5.494	7700.8	2674176		73	2674176	2.59436e+06	79820.8	6.37135e+09
	5.569	6638.2	2.59436e+06		74
	5.645	6959	2409984		75	2409984	2.75451e+06	-344525	1.18697e+11
	5.72	6758.4	2.75451e+06		76
	5.795	6357.4	2.65889e+06		77	2.65889e+06	2.52082e+06	138074	1.90643e+10
	5.87	6518	2.52082e+06		78
	5.946	7039.4	2.75713e+06		79	2.75713e+06	2605056	152077	2.31273e+10
	6.021	7119.6	2605056		80
	6.096	6838.8	2.48012e+06		81	2.48012e+06	2.68669e+06	-206579	4.2675e+10
	6.171	6357.4	2.68669e+06		82
	6.247	7019	2563264		83	2563264	2590016	-26752	715669504
	6.322	6377.2	2590016		84
	6.397	6176.8	2.73647e+06		85	2.73647e+06	2.50596e+06	230515	53137165225
	6.472	6016.2	2.50596e+06		86				0
	6.548	5896	2.53199e+06		87	2.53199e+06	2.4342e+06	97792	9563275264
	6.623	6217	2.4342e+06		88
	6.698	6738.4	2.50706e+06		89	2.50706e+06	2.55804e+06	-50982.2	2.59919e+09
	6.773	6919	2.55804e+06		90
	6.849	6096.6	2.56151e+06		91	2.56151e+06	2.61048e+06	-48972.8	2.39833e+09
	6.924	6918.8	2.61048e+06		92
	6.999	7300	2.66468e+06		93	2.66468e+06	2.62194e+06	42739.2	1.82664e+09
	7.074	6297.4	2.62194e+06		94
	7.149	7219.6	2.6972e+06		95	2.6972e+06	2.68344e+06	13760	189337600
	7.225	6738.2	2.68344e+06		96
	7.3	6337.2	2.49787e+06		97	2.49787e+06	2.55969e+06	-61824	3822206976
	7.375	6377.4	2.55969e+06		98
	7.45	7580.8	2.69847e+06		99	2.69847e+06	2.48769e+06	210778	4.44273e+10
	7.526	5675.4	2.48769e+06		100
	7.601	5956	2.49635e+06		101	2.49635e+06	2.6683e+06	-171955	2.95686e+10
	7.676	7099.4	2.6683e+06		102
	7.751	6698.4	2.50601e+06		103	2.50601e+06	2.61283e+06	-106816	11409657856
	7.827	6658	2.61283e+06		104
	7.902	6016.2	2558656		105	2558656	2.43884e+06	119821	1.4357e+10
	7.977	6878.6	2.43884e+06		106
	8.052	6718.4	2647936		107	2647936	2.50273e+06	145203	2.1084e+10
	8.128	6417.6	2.50273e+06		108
	8.203	6558	2.48929e+06		109	2.48929e+06	2.6972e+06	-207910	4.32268e+10
	8.278	6698.2	2.6972e+06		110
	8.353	6758.6	2.63306e+06		111	2.63306e+06	2.61007e+06	22989	528494121
	8.429	6658	2.61007e+06		112
	8.504	7259.6	2.71169e+06		113	2.71169e+06	2.50002e+06	211674	4.48057e+10
	8.579	7480.4	2.50002e+06		114
	8.654	7119.6	2.68687e+06		115	2.68687e+06	2.6994e+06	-12531.2	1.57032e+08
	8.73	6858.8	2.6994e+06		116
	8.805	6277.2	2.45844e+06		117	2.45844e+06	2.7237e+06	-265254	7.03599e+10
	8.88	6457.6	2.7237e+06		118
	8.955	6758.6	2.55442e+06		119	2.55442e+06	2.49981e+06	54604.8	2.98168e+09
	9.03	6838.8	2.49981e+06		120
	9.106	6818.4	2.59685e+06		121	2.59685e+06	2.63822e+06	-41369.5	1.71144e+09
	9.181	6979	2.63822e+06		122
	9.256	6497.6	2.57745e+06		123	2.57745e+06	2699968	-122522	1.50115e+10
	9.331	7139.4	2699968		124
	9.407	7179.6	2.57974e+06		125	2.57974e+06	2.46267e+06	117069	1.37051e+10
	9.482	7079.2	2.46267e+06		126
	9.557	7019.2	2.72399e+06		127	2.72399e+06	2.42525e+06	298739	89244990121
	9.632	7059	2.42525e+06		128
	9.708	6918.8	2.70153e+06		129	2.70153e+06	2.74994e+06	-48409.8	2.3435e+09
	9.783	6557.8	2.74994e+06		130
	9.858	7400	2.56383e+06		131	2.56383e+06	2.56095e+06	2880	8294400
	9.933	7139.4	2.56095e+06		132
	10.009	6838.6	2628864		133	2628864	2.47493e+06	153933	2.36953e+10
	10.084	6838.6	2.47493e+06		134
	10.159	6738.4	2.70636e+06		135	2.70636e+06	2.51396e+06	192397	3.70165e+10
	10.234	6497.8	2.51396e+06		136
	10.31	6718.2	2445568		137	2445568	2.66894e+06	-223373	4.98954e+10
	10.385	6939	2.66894e+06		138
	10.46	6076.4	2.56105e+06		139	2.56105e+06	2557184	3865.5	1.49421e+07
	10.535	7400	2557184		140
	10.611	6798.6	2652608		141	2652608	2.48227e+06	170342	2.90166e+10
	10.686	6758.2	2.48227e+06		142
	10.761	6778.4	2.59594e+06		143	2.59594e+06	2.6702e+06	-74252.8	5.51347e+09
	10.836	6197	2.6702e+06		144
	10.911	6878.8	2.51214e+06		145	2.51214e+06	2645056	-132915	1.76665e+10
	10.987	6116.6	2645056		146
	11.062	6517.8	2.67387e+06		147	2.67387e+06	2.63023e+06	43635.2	1.90404e+09
	11.137	6197	2.63023e+06		148
	11.212	6858.6	2.61988e+06		149	2.61988e+06	2607424	12454.5	1.55115e+08
	11.288	7119.4	2607424		150
	11.363	6517.6	2533312		151	2533312	2.65507e+06	-121754	1.48239e+10
	11.438	6277	2.65507e+06		152
	11.513	6377.4	2.51954e+06		153	2.51954e+06	2.61464e+06	-95104	9044770816
	11.589	6678	2.61464e+06		154
	11.664	7320	2.76577e+06		155	2.76577e+06	2.39997e+06	365798	1.33808e+11
	11.739	6317.2	2.39997e+06		156
	11.814	6718	2.54207e+06		157	2.54207e+06	2683136	-141069	1.99004e+10
	11.89	6297	2683136		158
	11.965	6216.8	2.46653e+06		159	2.46653e+06	2.53923e+06	-72691	5283981481
	12.04	6357.4	2.53923e+06		160
	12.115	6738.2	2.7153e+06		161	2.7153e+06	2.4891e+06	226202	5.11672e+10
	12.191	6297.2	2.4891e+06		162
	12.266	6377.2	2.71913e+06		163	2.71913e+06	2.58025e+06	138880	19287654400
	12.341	6477.6	2.58025e+06		164
	12.416	6096.4	2.55301e+06		165	2.55301e+06	2.54697e+06	6041.75	3.65027e+07
	12.492	7279.8	2.54697e+06		166
	12.567	5334.6	2.54271e+06		167	2.54271e+06	2.63073e+06	-88025.5	7.74849e+09
	12.642	6537.8	2.63073e+06		168
	12.717	6818.4	2.61974e+06		169	2.61974e+06	2.49277e+06	126963	16119603369
	12.792	7139.6	2.49277e+06		170
	12.868	6959.2	2.5409e+06		171	2.5409e+06	2.63773e+06	-96832	9376436224
	12.943	6357.2	2.63773e+06		172
	13.018	6317	2.56893e+06		173	2.56893e+06	2.76316e+06	-194227	37724127529
	13.093	6858.8	2.76316e+06		174
	13.169	6176.8	2.51233e+06		175	2.51233e+06	2501184	11148.8	1.24295e+08
	13.244	5976.4	2501184		176
	13.319	6317.2	2.59261e+06		177	2.59261e+06	2.48328e+06	109338	1.19547e+10
	13.394	6096.6	2.48328e+06		178
	13.47	6417.4	2.60791e+06		179	2.60791e+06	2.55487e+06	53043.2	2.81359e+09
	13.545	6638.2	2.55487e+06		180
	13.62	6156.6	2.49876e+06		181	2.49876e+06	2.61763e+06	-118861	1.41279e+10
	13.695	6919	2.61763e+06		182
	13.771	6437.6	2.74858e+06		183	2.74858e+06	2463424	285158	8.13154e+10
	13.846	6377.6	2463424		184
	13.921	6517.8	2.46934e+06		185	2.46934e+06	2.72305e+06	-253709	64368256681
	13.996	6938.8	2.72305e+06		186
	14.072	6297.2	2477760		187	2477760	2.58725e+06	-109491	1.19883e+10
	14.147	6417.4	2.58725e+06		188
	14.222	6919.2	2.41375e+06		189	2.41375e+06	2577600	-163853	2.68477e+10
	14.297	7259.6	2577600		190
	14.373	6979	2.50435e+06		191	2.50435e+06	2.53748e+06	-33139.2	1.09821e+09
	14.448	6959.2	2.53748e+06		192
	14.523	5956.2	2.57221e+06		193	2.57221e+06	2.66574e+06	-93529.5	8.74777e+09
	14.598	6658.2	2.66574e+06		194
	14.673	7059.2	2532544		195	2532544	2.69857e+06	-166029	2.75655e+10
	14.749	6116.4	2.69857e+06		196
	14.824	7179.6	2.53567e+06		197	2.53567e+06	2.62968e+06	-94016	8839008256
	14.899	6537.8	2.62968e+06		198
	14.974	7320	2.6292e+06		199	2.6292e+06	2.62461e+06	4582.25	2.0997e+07
	15.05	6999.2	2.62461e+06		200
	15.125	6237	2.68716e+06		201	2.68716e+06	2.73585e+06	-48691.2	2.37084e+09
	15.2	7179.6	2.73585e+06		202
	15.275	6738.2	2620224		203	2620224	2.42269e+06	197530	3.90179e+10
	15.351	5414.6	2.42269e+06		204
	15.426	7039.2	2.6962e+06		205	2.6962e+06	2.68076e+06	15449.5	2.38687e+08
	15.501	6437.6	2.68076e+06		206
	15.576	7239.6	2687936		207	2687936	2.42678e+06	261158	6.82038e+10
	15.652	7259.8	2.42678e+06		208
	15.727	7621	2.70167e+06		209	2.70167e+06	2603328	98342.5	9.67125e+09
	15.802	6778.6	2603328		210
	15.877	6658.2	2.47457e+06		211	2.47457e+06	2568000	-93427.2	8.72865e+09
	15.953	7019.2	2568000		212
	16.028	6397.4	2.66789e+06		213	2.66789e+06	2.51436e+06	153536	23573303296
	16.103	6297.2	2.51436e+06		214
	16.178	6337.4	2653504		215	2653504	2.83587e+06	-182362	3.32557e+10
	16.254	6818.4	2.83587e+06		216
	16.329	7199.4	2.85204e+06		217	2.85204e+06	2.71425e+06	137792	18986635264
	16.404	6237	2.71425e+06		218
	16.479	6778.4	2.56891e+06		219	2.56891e+06	2524288	44620.8	1.99101e+09
	16.554	7360	2524288		220
	16.63	7540.4	2.57691e+06		221	2.57691e+06	2.74185e+06	-164941	2.72055e+10
	16.705	6938.6	2.74185e+06		222
	16.78	5976.2	2.55773e+06		223	2.55773e+06	2.59836e+06	-40627	1650553129
	16.855	7861.4	2.59836e+06		224
	16.931	6617.8	2.78418e+06		225	2.78418e+06	2.50947e+06	274714	7.54676e+10
	17.006	7159.6	2.50947e+06		226
	17.081	6999.2	2.49292e+06		227	2.49292e+06	2.45061e+06	42304	1789628416
	17.156	6397.2	2.45061e+06		228
	17.232	6798.4	2.69956e+06		229	2.69956e+06	2.74552e+06	-45964.8	2.11276e+09
	17.307	7079.2	2.74552e+06		230
	17.382	6758.4	2.66231e+06		231	2.66231e+06	2.77644e+06	-114125	1.30245e+10
	17.457	6457.8	2.77644e+06		232
s(Imean)			6334.02					6805.77	6806.53

## Sheet: transient signal
	TRANSIENT SIGNAL
	The original data were acquired using an Element XR sector-field ICPMS interfaced to an UP-193FX laser ablation system.
	The GJ-1 standard zircon was ablated in the spot mode at a repetition rate of 5 Hz, 35 mkm beam size and 2.3 J/cm2 on-sample energy density.
	(the data represent a routine standard analysis acquired during the U-Pb LA-ICPMS dating of a series of sample zircons)
	U238 was collected in the analalog regime, hence a higher background intensity.
	Original data										Calculations, signal made of 612 sweeps																	Calculations, the end part of the previous signal made of 164 sweps and showing little transience
	Trace for Mass:	Hg201(LR)	Pb204(LR)	Pb206(LR)	Pb207(LR)	Pb208(LR)	Th232(LR)	U235(LR)	U238(LR)		Sweep		Pb207						U238						U238			Sweep		Pb207						U238
	Resolution:	Low	Low	Low	Low	Low	Low	Low	Low		number	Time	Ii, cps	Ii, cps	Ii+1, cps	I2i-1-I2i, cps	(I2i-1-I2i)2, cps		Ii, cps	Ii, cps	Ii+1, cps	I2i-1-I2i, cps	(I2i-1-I2i)2, cps		Ii, cps	variance of the		number	Time	Ii, cps	Ii, cps	Ii+1, cps	I2i-1-I2i, cps	(I2i-1-I2i)2, cps		Ii, cps	Ii, cps	Ii+1, cps	I2i-1-I2i, cps	(I2i-1-I2i)2, cps
											in the	[sec]	original	odd sweeps,	even sweeps,	exact	approximate		original	odd sweeps,	even sweeps,	exact	approximate		original	mean intensity		in the	[sec]	original	odd sweeps,	even sweeps,	exact	approximate		original	odd sweeps,	even sweeps,	exact	approximate
	Time	Intensity	Intensity	Intensity	Intensity	Intensity	Intensity	Intensity	Intensity		signal		signal	series a	series b	formula	formula		signal	series a	series b	formula (14)	formula (14)		signal	per segment		signal		signal	series a	series b	formula	formula		signal	series a	series b	formula (14)	formula (14)
	[sec]	[cps]	[cps]	[cps]	[cps]	[cps]	[cps]	[cps]	[cps]
											background cut off
	0.062	203	0	0	0	0	0	0	3796.55		1	41.218	4739	4739	5445	-706	498436		802965	802965	787779	15186.2	2.3062e+08		802965			451	68.215	4336	4336	6353	-2017	4068289		740317	740317	747892	-7574.44	5.73721e+07
	0.122	407	203	0	201	0	0	0	3796.55		2	41.278	5445						787779						787779			452	68.275	6353						747892
	0.182	203	0	0	0	0	524	0	1893.61		3	41.338	5243	5243	3932	1311	1718721		763097	763097	757406	5690.19	3.23782e+07		763097			453	68.335	4739	4739	3428	1311	1718721		689069	689069	654890	34178.2	1.16815e+09
	0.242	203	610	0	0	0	0	0	3796.55		4	41.398	3932						757406						757406			454	68.395	3428						654890
	0.302	610	407	0	0	0	0	0	3796.55		5	41.458	2924	2924	4134	-1210	1464100		878896	878896	882664	-3768.56	1.42021e+07		878896			455	68.455	5344	5344	2218	3126	9771876		761175	761175	694759	66416.2	4.41112e+09
	0.362	610	0	0	0	0	0	0	3796.55		6	41.518	4134						882664						882664			456	68.515	2218						694759
	0.422	203	0	0	0	524	0	0	1893.61		7	41.578	4235	4235	5143	-908	824464		840930	840930	825726	15204.9	2.31188e+08		840930			457	68.575	5243	5243	3226	2017	4068289		715635	715635	725131	-9496	90174016
	0.482	203	610	0	0	0	0	0	3796.55		8	41.638	5143						825726						825726			458	68.635	3226						725131
	0.542	0	0	0	100	0	0	0	3796.55		9	41.698	3630	3630	4537	-907	822649		844718	844718	761175	83542.7	6.97938e+09		844718			459	68.695	3226	3226	4336	-1110	1232100		706158	706158	664386	41771.4	1.74485e+09
	0.602	407	0	0	0	0	0	0	3796.55		10	41.758	4537						761175						761175			460	68.755	4336						664386
	0.662	814	203	0	0	0	0	0	1893.61		11	41.818	6151	6151	4033	2118	4485924		814345	814345	772593	41752.7	1.74329e+09		814345			461	68.815	3529	3529	3428	101	10201		814345	814345	780186	34159.6	1.16688e+09
	0.722	0	0	0	0	0	0	0	3796.55		12	41.878	4033						772593						772593			462	68.875	3428						780186
	0.782	0	203	0	0	0	0	0	1893.61		13	41.938	4033	4033	3932	101	10201		829532	829532	799159	30372.4	9.22481e+08		829532			463	68.935	3125	3125	3731	-606	367236		679573	679573	715635	-36062.6	1.30051e+09
	0.842	203	407	0	0	0	0	0	1893.61		14	41.998	3932						799159						799159			464	68.995	3731						715635
	0.902	0	0	610	0	0	0	253	1893.61		15	42.058	4235	4235	4336	-101	10201		825726	825726	852292	-26566.5	7.05779e+08		825726			465	69.055	4134	4134	4537	-403	162409		696662	696662	742220	-45558.6	2.07558e+09
	0.962	610	407	0	0	0	0	0	3796.55		16	42.118	4336						852292						852292			466	69.115	4537						742220
	1.022	0	0	0	0	0	0	0	1893.61		17	42.178	5143	5143	4941	202	40804		789682	789682	808636	-18954.8	3.59283e+08		789682			467	69.175	3226	3226	4941	-1715	2941225		647297	647297	772593	-125295	1.56989e+10
	1.082	203	0	0	0	0	0	0	3796.55		18	42.238	4941						808636						808636			468	69.235	4941						772593
	1.142	407	407	0	0	0	0	0	3796.55		19	42.298	2924	2924	3831	-907	822649		839009	839009	852292	-13283.2	1.76445e+08		839009			469	69.295	3529	3529	2823	706	498436		709945	709945	654890	55054.6	3.031e+09
	1.202	203	0	0	0	0	0	0	5690.16		20	42.358	3831						852292						852292			470	69.355	2823						654890
	1.262	610	814	0	100	0	0	0	3796.55		21	42.418	4437	4437	3529	908	824464		799159	799159	932048	-132888	1.76594e+10		799159			471	69.415	4235	4235	3932	303	91809		804868	804868	816248	-11380.3	1.29512e+08
	1.322	203	203	0	0	0	0	0	1893.61		22	42.478	3529						932048						932048			472	69.475	3932						816248
	1.382	203	0	0	0	0	0	0	3796.55		23	42.538	4033	4033	6151	-2118	4485924		894082	894082	1.01367e+06	-119587	1.43009e+10		894082			473	69.535	3025	3025	3226	-201	40401		670058	670058	757406	-87348.6	7.62977e+09
	1.442	203	0	0	0	0	0	0	3796.55		24	42.598	6151						1.01367e+06						1.01367e+06			474	69.595	3226						757406
	1.502	0	814	0	0	0	0	0	1893.61		25	42.658	4739	4739	4336	403	162409		932048	932048	930126	1921.62	3.69264e+06		932048			475	69.655	2520	2520	4033	-1513	2289169		829532	829532	634014	195518	3.82271e+10
	1.562	0	0	0	0	0	0	0	3796.55		26	42.718	4336						930126						930126			476	69.715	4033						634014
	1.622	0	407	0	0	0	0	0	1893.61		27	42.778	6252	6252	5748	504	254016		871303	871303	888392	-17089.1	2.92038e+08		871303			477	69.775	4437	4437	3731	706	498436		681476	681476	759309	-77833.9	6.05811e+09
	1.682	0	0	0	0	0	0	0	3796.55		28	42.838	5748						888392						888392			478	69.835	3731						759309
	1.742	814	0	0	0	0	0	0	5690.16		29	42.898	5445	5445	4638	807	651249		962420	962420	966207	-3787.19	1.43428e+07		962420			479	69.895	5042	5042	4033	1009	1018081		736530	736530	628324	108206	1.17086e+10
	1.802	0	0	0	201	0	0	0	1893.61		30	42.958	4638						966207						966207			480	69.955	4033						628324
	1.862	407	203	0	0	0	0	0	1893.61		31	43.018	4638	4638	4941	-303	91809		821920	821920	820054	1865.62	3.48056e+06		821920			481	70.015	3630	3630	4638	-1008	1016064		719441	719441	662483	56957.6	3.24416e+09
	1.922	814	1017	203	0	0	0	0	3796.55		32	43.078	4941						820054						820054			482	70.075	4638						662483
	1.982	0	0	0	0	0	0	0	1893.61		33	43.138	5143	5143	4235	908	824464		983296	983296	975703	7593.06	5.76546e+07		983296			483	70.135	3831	3831	3125	706	498436		601748	601748	656775	-55026.6	3.02793e+09
	2.042	203	0	0	0	0	0	0	3796.55		34	43.198	4235						975703						975703			484	70.195	3125						656775
	2.102	610	0	0	0	0	0	0	1893.61		35	43.258	5042	5042	5042	0	0		909268	909268	968110	-58841.8	3.46236e+09		909268			485	70.255	3831	3831	5143	-1312	1721344		715635	715635	675785	39849.8	1.588e+09
	2.162	610	203	0	0	0	0	0	3796.55		36	43.318	5042						968110						968110	1.40205e+08		486	70.315	5143						675785
	2.222	203	203	0	0	0	0	0	3796.55		37	43.378	5143	5143	4739	404	163216		996580	996580	930126	66453.6	4.41608e+09		996580			487	70.375	4336	4336	4134	202	40804		704236	704236	799159	-94923	9010375929
	2.282	203	407	0	0	0	0	0	3796.55		38	43.438	4739						930126						930126			488	70.435	4134						799159
	2.342	407	407	0	0	0	0	0	1893.61		39	43.498	3428	3428	5647	-2219	4923961		778264	778264	858020	-79755.5	6.36094e+09		778264			489	70.495	3932	3932	3529	403	162409		711848	711848	685263	26585.1	7.06769e+08
	2.402	203	0	0	0	0	0	0	3796.55		40	43.558	5647						858020						858020			490	70.555	3529						685263
	2.462	0	0	0	0	0	0	0	3796.55		41	43.618	3731	3731	4537	-806	649636		960498	960498	818151	142347	2.02627e+10		960498			491	70.615	4437	4437	3731	706	498436		751698	751698	696662	55035.9	3.02895e+09
	2.522	0	203	0	0	0	0	0	3796.55		42	43.678	4537						818151						818151			492	70.675	3731						696662
	2.582	610	814	0	0	0	0	0	3796.55		43	43.738	5344	5344	4437	907	822649		939641	939641	913037	26603.8	7.07763e+08		939641			493	70.735	4638	4638	3226	1412	1993744		687147	687147	685263	1884.25	3.5504e+06
	2.642	0	0	0	0	0	0	0	3796.55		44	43.798	4437						913037						913037			494	70.795	3226						685263
	2.702	407	203	203	0	0	0	0	3796.55		45	43.858	5546	5546	6353	-807	651249		888392	888392	962420	-74028	5480144784		888392			495	70.855	5445	5445	4638	807	651249		742220	742220	613119	129101	1.66671e+10
	2.762	0	203	0	100	0	0	0	1893.61		46	43.918	6353						962420						962420			496	70.915	4638						613119
	2.822	0	0	0	0	0	0	0	3796.55		47	43.978	4235	4235	3630	605	366025		926357	926357	964304	-37946.8	1.43996e+09		926357			497	70.975	3428	3428	3831	-403	162409		647297	647297	723228	-75930.9	5.76551e+09
	2.882	407	0	0	0	524	0	0	1893.61		48	44.037	3630						964304						964304			498	71.035	3831						723228
	2.942	0	203	0	0	0	0	0	1893.61		49	44.097	4739	4739	4739	0	0		837125	837125	875090	-37965.4	1.44137e+09		837125			499	71.095	3831	3831	4134	-303	91809		653006	653006	634014	18992.1	3.60698e+08
	3.002	203	203	0	0	0	0	0	1893.61		50	44.157	4739						875090						875090			500	71.155	4134						634014
	3.062	0	0	0	0	0	0	0	1893.61		51	44.217	5243	5243	7462	-2219	4923961		922552	922552	875090	47461.5	2.25259e+09		922552			501	71.215	4537	4537	4941	-404	163216		801062	801062	696662	104400	1.08994e+10
	3.122	0	0	0	0	0	0	0	1893.61		52	44.277	7462						875090						875090			502	71.275	4941						696662
	3.182	203	0	0	0	0	0	0	3796.55		53	44.337	5042	5042	5042	0	0		994677	994677	916843	77833.9	6.05811e+09		994677			503	71.335	4537	4537	3529	1008	1016064		670058	670058	679573	-9514.69	9.05293e+07
	3.242	203	0	0	0	0	0	0	3796.55		54	44.397	5042						916843						916843			504	71.395	3529						679573
	3.302	203	203	203	0	0	0	0	5690.16		55	44.457	5445	5445	3428	2017	4068289		827647	827647	952924	-125277	1.56942e+10		827647			505	71.455	3932	3932	3831	101	10201		715635	715635	605545	110091	1.21199e+10
	3.362	203	0	0	0	0	0	0	3796.55		56	44.517	3428						952924						952924			506	71.515	3831						605545
	3.421	0	407	0	0	0	0	0	1893.61		57	44.577	7160	7160	5243	1917	3674889		895985	895985	888392	7593.06	5.76546e+07		895985			507	71.575	4033	4033	2319	1714	2937796		702352	702352	747892	-45539.9	2.07388e+09
	3.481	203	203	0	0	0	0	0	1893.61		58	44.637	5243						888392						888392			508	71.635	2319						747892
	3.541	0	203	0	0	0	0	0	3796.55		59	44.697	4033	4033	7261	-3228	10419984		766902	766902	911171	-144269	2.08135e+10		766902			509	71.695	4739	4739	4033	706	498436		690953	690953	637820	53133	2823115689
	3.601	0	0	0	0	0	0	0	1893.61		60	44.757	7261						911171						911171			510	71.755	4033						637820
	3.661	407	203	203	0	0	0	0	3796.55		61	44.817	4437	4437	5748	-1311	1718721		958614	958614	970013	-11398.9	1.29936e+08		958614			511	71.815	3731	3731	4033	-302	91204		772593	772593	721325	51267.4	2.62834e+09
	3.721	814	0	0	0	0	0	0	3796.55		62	44.877	5748						970013						970013			512	71.875	4033						721325
	3.781	0	203	0	0	0	0	0	3796.55		63	44.937	4437	4437	5949	-1512	2286144		1045944	1045944	977588	68356.5	4.67261e+09		1045944			513	71.935	4739	4739	4033	706	498436		751698	751698	793469	-41771.4	1.74485e+09
	3.841	0	0	0	0	0	0	0	1893.61		64	44.997	5949						977588						977588			514	71.995	4033						793469
	3.901	203	203	0	0	0	0	0	1893.61		65	45.057	5647	5647	7362	-1715	2941225		1.01367e+06	1.01367e+06	842815	170854	2.91911e+10		1.01367e+06			515	72.055	4941	4941	5445	-504	254016		818151	818151	624518	193633	3.74938e+10
	3.961	0	0	0	0	0	0	0	5690.16		66	45.117	7362						842815						842815			516	72.115	5445						624518
	4.021	0	0	0	0	0	0	0	3796.55		67	45.177	4537	4537	3731	806	649636		833337	833337	911171	-77833.9	6.05811e+09		833337			517	72.175	3731	3731	4739	-1008	1016064		660580	660580	782070	-121490	1.47597e+10
	4.081	814	407	0	0	0	0	0	3796.55		68	45.237	3731						911171						911171			518	72.235	4739						782070
	4.141	203	610	0	0	0	0	0	0		69	45.297	6353	6353	4336	2017	4068289		856098	856098	954827	-98728.9	9.74739e+09		856098			519	72.295	5143	5143	2420	2723	7414729		692856	692856	605545	87311.2	7.62325e+09
	4.201	407	610	0	0	0	0	0	1893.61		70	45.357	4336						954827						954827			520	72.355	2420						605545
	4.261	203	0	0	0	0	0	0	1893.61		71	45.417	5243	5243	3630	1613	2601769		873187	873187	854214	18973.4	3.59989e+08		873187			521	72.415	3731	3731	5546	-1815	3294225		764981	764981	711848	53133	2823115689
	4.321	0	0	0	0	0	0	0	1893.61		72	45.477	3630						854214						854214	1.1949e+08		522	72.475	5546						711848
	4.381	0	407	0	0	0	0	0	3796.55		73	45.537	4739	4739	4537	202	40804		935835	935835	905462	30372.4	9.22481e+08		935835			523	72.535	3428	3428	5647	-2219	4923961		626402	626402	744123	-117721	1.38582e+10
	4.441	0	203	0	0	0	0	0	3796.55		74	45.597	4537						905462						905462			524	72.595	5647						744123
	4.501	407	203	0	0	0	0	0	1893.61		75	45.657	4336	4336	5143	-807	651249		990871	990871	970013	20857.7	4.35043e+08		990871			525	72.655	4638	4638	4638	0	0		848524	848524	622634	225890	5.10262e+10
	4.561	0	0	0	0	0	0	0	3796.55		76	45.717	5143						970013						970013			526	72.715	4638						622634
	4.621	203	407	0	0	0	0	0	0		77	45.777	4235	4235	6050	-1815	3294225		831434	831434	899754	-68319.2	4.66751e+09		831434			527	72.775	3327	3327	5546	-2219	4923961		683378	683378	727034	-43655.6	1.90581e+09
	4.681	407	0	0	0	0	0	0	3796.55		78	45.837	6050						899754						899754			528	72.835	5546						727034
	4.741	407	0	0	0	0	0	0	3796.55		79	45.897	4739	4739	5344	-605	366025		810558	810558	888392	-77833.9	6.05811e+09		810558			529	72.895	5042	5042	4235	807	651249		698565	698565	628324	70240.8	4.93376e+09
	4.801	0	0	0	0	0	0	0	1893.61		80	45.957	5344						888392						888392			530	72.955	4235						628324
	4.861	610	0	0	0	524	0	0	1893.61		81	46.017	4336	4336	5748	-1412	1993744		867497	867497	888392	-20895	436601025		867497			531	73.015	3428	3428	5344	-1916	3671056		753601	753601	651103	102497	1.05057e+10
	4.921	203	203	0	0	0	0	0	1893.61		82	46.077	5748						888392						888392			532	73.075	5344						651103
	4.981	407	0	0	0	0	0	0	1893.61		83	46.137	4537	4537	6151	-1614	2604996		899754	899754	835240	64513.3	4.16197e+09		899754			533	73.135	2722	2722	4840	-2118	4485924		651103	651103	689069	-37965.5	1.44138e+09
	5.041	203	407	0	0	0	0	0	1893.61		84	46.197	6151						835240						835240			534	73.195	4840						689069
	5.101	407	203	0	0	0	0	0	5690.16		85	46.257	4537	4537	4537	0	0		882664	882664	861807	20857.7	4.35043e+08		882664			535	73.255	5647	5647	2924	2723	7414729		761175	761175	689069	72106.4	5.19933e+09
	5.161	203	203	0	0	0	0	0	5690.16		86	46.317	4537						861807						861807			536	73.315	2924						689069
	5.221	203	203	0	0	0	0	0	3796.55		87	46.377	5143	5143	4437	706	498436		876993	876993	890276	-13283.2	1.76445e+08		876993			537	73.375	3125	3125	4638	-1513	2289169		681476	681476	683378	-1902.94	3.62117e+06
	5.281	203	0	0	201	0	0	0	1893.61		88	46.437	4437						890276						890276			538	73.435	4638						683378
	5.341	203	407	0	0	0	0	0	1893.61		89	46.497	5143	5143	4638	505	255025		909268	909268	913037	-3768.56	1.42021e+07		909268			539	73.495	3025	3025	3630	-605	366025		592261	592261	653006	-60744.8	3.68992e+09
	5.401	0	203	0	0	0	0	0	1893.61		90	46.557	4638						913037						913037			540	73.555	3630						653006
	5.461	0	407	0	100	0	0	0	1893.61		91	46.617	3529	3529	4638	-1109	1229881		876993	876993	886470	-9477.38	8.98206e+07		876993			541	73.615	3025	3025	4638	-1613	2601769		677670	677670	666289	11380.3	1.29512e+08
	5.521	407	407	0	0	0	0	0	3796.55		92	46.677	4638						886470						886470			542	73.675	4638						666289
	5.581	203	0	0	100	0	0	0	3796.55		93	46.737	3831	3831	4336	-505	255025		920649	920649	922552	-1902.94	3.62117e+06		920649			543	73.735	3327	3327	3327	0	0		565686	565686	626402	-60716.8	3.68652e+09
	5.641	407	0	0	0	0	0	0	3796.55		94	46.797	4336						922552						922552			544	73.795	3327						626402
	5.701	0	610	0	0	0	0	0	1893.61		95	46.857	5344	5344	5042	302	91204		954827	954827	863710	91117.1	8.30233e+09		954827			545	73.855	4537	4537	3630	907	822649		766902	766902	668192	98710.2	9.74371e+09
	5.761	0	203	610	100	0	0	0	3796.55		96	46.917	5042						863710						863710			546	73.915	3630						668192
	5.821	203	407	0	0	0	0	0	1893.61		97	46.977	4638	4638	6050	-1412	1993744		827647	827647	909268	-81621.1	6.662e+09		827647			547	73.975	5546	5546	5445	101	10201		654890	654890	757406	-102516	1.05095e+10
	5.881	203	0	0	0	0	0	0	3796.55		98	47.037	6050						909268						909268			548	74.035	5445						757406
	5.941	407	0	0	0	0	524	0	0		99	47.097	3831	3831	4941	-1110	1232100		816248	816248	852292	-36043.9	1.29916e+09		816248			549	74.095	4437	4437	3630	807	651249		702352	702352	662483	39868.4	1.58949e+09
	6.001	1831	203	0	0	0	0	0	1893.61		100	47.157	4941						852292						852292			550	74.155	3630						662483
	6.061	0	814	0	0	0	0	0	0		101	47.217	4336	4336	3630	706	498436		918764	918764	833337	85427	7297772329		918764			551	74.215	4537	4537	4638	-101	10201		728937	728937	630208	98728.9	9.74739e+09
	6.121	1017	203	0	0	0	0	0	3796.55		102	47.277	3630						833337						833337			552	74.275	4638						630208
	6.181	203	0	0	0	0	0	0	1893.61		103	47.337	4537	4537	5042	-505	255025		814345	814345	880799	-66453.6	4.41608e+09		814345			553	74.334	2319	2319	3630	-1311	1718721		639686	639686	634014	5671.5	3.21659e+07
	6.241	0	407	0	0	1048	0	0	0		104	47.397	5042						880799						880799			554	74.395	3630						634014
	6.301	1628	0	0	0	0	0	0	3796.55		105	47.457	5849	5849	5546	303	91809		928242	928242	846621	81621.1	6.66201e+09		928242			555	74.454	5243	5243	4537	706	498436		624518	624518	670058	-45539.9	2.07388e+09
	6.361	203	203	0	0	0	0	0	1893.61		106	47.517	5546						846621						846621			556	74.514	4537						670058
	6.421	407	0	0	0	0	0	0	1893.61		107	47.577	5748	5748	5546	202	40804		890276	890276	975703	-85427	7297772329		890276			557	74.574	4235	4235	4537	-302	91204		677670	677670	831434	-153765	2.36436e+10
	6.481	407	0	0	0	0	0	0	1893.61		108	47.637	5546						975703						975703	5.78529e+07		558	74.634	4537						831434
	6.541	814	0	0	0	0	524	0	3796.55		109	47.697	4941	4941	4033	908	824464		789682	789682	825726	-36043.9	1.29916e+09		789682			559	74.694	4739	4739	5042	-303	91809		715635	715635	651103	64532	4164379024
	6.601	0	0	0	0	0	0	0	1893.61		110	47.757	4033						825726						825726			560	74.754	5042						651103
	6.661	407	0	0	0	0	0	0	3796.55		111	47.817	5445	5445	4033	1412	1993744		926357	926357	911171	15186.2	2.3062e+08		926357			561	74.814	4134	4134	3932	202	40804		730803	730803	685263	45539.9	2.07388e+09
	6.721	1017	0	0	0	0	0	0	1893.61		112	47.877	4033						911171						911171			562	74.874	3932						685263
	6.781	0	610	0	0	0	0	0	1893.61		113	47.937	4840	4840	4235	605	366025		846621	846621	858020	-11399	129937201		846621			563	74.934	3327	3327	4537	-1210	1464100		654890	654890	662483	-7593.06	5.76546e+07
	6.841	0	0	0	0	0	0	0	3796.55		114	47.997	4235						858020						858020			564	74.994	4537						662483
	6.901	0	0	0	0	0	0	0	1893.61		115	48.057	5344	5344	4134	1210	1464100		829532	829532	825726	3805.88	1.44847e+07		829532			565	75.054	5042	5042	2722	2320	5382400		732724	732724	626402	106322	11304367684
	6.961	203	0	0	0	0	0	0	3796.55		116	48.117	4134						825726						825726			566	75.114	2722						626402
	7.021	0	0	0	0	0	0	0	3796.55		117	48.177	3327	3327	5546	-2219	4923961		839009	839009	905462	-66453.6	4.41608e+09		839009			567	75.174	2621	2621	3226	-605	366025		662483	662483	732724	-70240.8	4.93377e+09
	7.081	0	0	0	0	0	0	0	1893.61		118	48.237	5546						905462						905462			568	75.234	3226						732724
	7.141	1017	0	0	0	0	0	253	0		119	48.297	3731	3731	4134	-403	162409		772593	772593	795353	-22760.6	5.18046e+08		772593			569	75.294	4537	4537	3125	1412	1993744		673864	673864	548596	125267	1.56919e+10
	7.201	407	0	0	0	0	0	0	0		120	48.357	4134						795353						795353			570	75.354	3125						548596
	7.261	0	0	0	100	0	0	0	3796.55		121	48.417	5647	5647	4134	1513	2289169		895985	895985	903560	-7574.44	5.73721e+07		895985			571	75.414	5647	5647	3125	2522	6360484		668192	668192	634014	34178.2	1.16815e+09
	7.321	203	0	0	0	0	0	0	3796.55		122	48.477	4134						903560						903560			572	75.474	3125						634014
	7.381	203	203	0	0	0	0	0	3796.55		123	48.537	3630	3630	4537	-907	822649		725131	725131	835240	-110109	1.2124e+10		725131			573	75.534	3428	3428	4941	-1513	2289169		611244	611244	666289	-55045.2	3.02998e+09
	7.441	203	0	203	100	0	0	0	1893.61		124	48.597	4537						835240						835240			574	75.594	4941						666289
	7.501	407	0	0	100	0	0	0	0		125	48.657	3932	3932	3025	907	822649		884586	884586	694759	189827	3.60344e+10		884586			575	75.654	3125	3125	4739	-1614	2604996		742220	742220	635917	106303	1.13004e+10
	7.561	407	0	0	0	0	0	0	1893.61		126	48.717	3025						694759						694759			576	75.714	4739						635917
	7.621	610	203	0	0	0	0	0	3796.55		127	48.777	4134	4134	4537	-403	162409		812442	812442	882664	-70222.1	4.93115e+09		812442			577	75.774	3932	3932	2520	1412	1993744		599854	599854	791547	-191693	36746206249
	7.681	203	0	0	0	0	0	0	1893.61		128	48.837	4537						882664						882664			578	75.834	2520						791547
	7.741	610	610	0	0	0	0	0	1893.61		129	48.897	4437	4437	3932	505	255025		766902	766902	780186	-13283.2	1.76445e+08		766902			579	75.894	4336	4336	5042	-706	498436		653006	653006	601748	51258.1	2.62739e+09
	7.801	203	0	0	0	0	0	0	3796.55		130	48.957	3932						780186						780186			580	75.954	5042						601748
	7.861	0	0	0	0	0	0	0	1893.61		131	49.017	5143	5143	5143	0	0		852292	852292	850426	1865.62	3.48056e+06		852292			581	76.014	4033	4033	4336	-303	91809		768787	768787	620731	148056	21920579136
	7.921	610	203	0	0	0	0	0	3796.55		132	49.077	5143						850426						850426			582	76.074	4336						620731
	7.981	0	203	0	0	0	0	0	3796.55		133	49.137	5949	5949	4638	1311	1718721		734608	734608	907365	-172757	2.98449e+10		734608			583	76.134	2218	2218	2319	-101	10201		639686	639686	664386	-24700.9	6.10133e+08
	8.041	407	0	0	0	0	0	0	1893.61		134	49.197	4638						907365						907365			584	76.194	2319						664386
	8.101	814	0	0	0	0	0	0	3796.55		135	49.257	4134	4134	5243	-1109	1229881		886470	886470	804868	81602.4	6.65896e+09		886470			585	76.254	4134	4134	4235	-101	10201		645413	645413	575172	70240.8	4.93377e+09
	8.161	0	0	0	100	0	0	0	3796.55		136	49.317	5243						804868						804868			586	76.314	4235						575172
	8.221	0	0	0	0	0	0	0	1893.61		137	49.377	4437	4437	5647	-1210	1464100		884586	884586	888392	-3805.88	1.44847e+07		884586			587	76.374	2218	2218	4739	-2521	6355441		607448	607448	723228	-115781	1.34052e+10
	8.281	203	203	0	0	0	0	0	1893.61		138	49.437	5647						888392						888392			588	76.434	4739						723228
	8.341	610	0	0	0	0	0	0	1893.61		139	49.497	3831	3831	3731	100	10000		776380	776380	793469	-17089.1	2.92038e+08		776380			589	76.494	6655	6655	4033	2622	6874884		618828	618828	586562	32266	1041094756
	8.401	0	407	0	0	0	0	0	1893.61		140	49.557	3731						793469						793469			590	76.554	4033						586562
	8.461	0	0	0	0	0	0	0	1893.61		141	49.617	4235	4235	6050	-1815	3294225		865613	865613	880799	-15186.2	2.3062e+08		865613			591	76.614	2722	2722	4336	-1614	2604996		725131	725131	653006	72125.1	5.20202e+09
	8.521	610	203	0	0	0	0	0	3796.55		142	49.677	6050						880799						880799			592	76.674	4336						653006
	8.581	814	0	0	0	0	0	0	1893.61		143	49.737	3226	3226	4235	-1009	1018081		802965	802965	892179	-89214.2	7.95917e+09		802965			593	76.734	3025	3025	3226	-201	40401		597952	597952	605545	-7593.06	5.76546e+07
	8.641	0	0	0	0	0	0	0	1893.61		144	49.797	4235						892179						892179	9.33662e+07		594	76.794	3226						605545
	8.701	407	814	0	0	0	0	0	1893.61		145	49.857	7160	7160	4638	2522	6360484		865613	865613	795353	70259.4	4.93639e+09		865613			595	76.854	4941	4941	5445	-504	254016		641607	641607	586562	55045.3	3.02999e+09
	8.761	203	0	0	0	1048	0	0	1893.61		146	49.917	4638						795353						795353			596	76.914	5445						586562
	8.821	0	0	0	0	0	0	0	1893.61		147	49.977	4336	4336	4134	202	40804		865613	865613	878896	-13283.2	1.76445e+08		865613			597	76.974	4235	4235	4336	-101	10201		601748	601748	709945	-108197	1.17066e+10
	8.881	0	203	0	0	524	0	379	1893.61		148	50.037	4134						878896						878896			598	77.034	4336						709945
	8.941	814	203	0	0	0	0	0	0		149	50.097	5042	5042	4235	807	651249		774496	774496	772593	1902.94	3.62117e+06		774496			599	77.094	2823	2823	4033	-1210	1464100		613119	613119	601748	11371	129299641
	9.001	0	203	0	0	0	0	0	1893.61		150	50.157	4235						772593						772593			600	77.154	4033						601748
	9.061	203	0	0	0	0	0	0	1893.61		151	50.217	4537	4537	6353	-1816	3297856		835240	835240	810558	24682.2	6.0921e+08		835240			601	77.214	3731	3731	2924	807	651249		683378	683378	683378	0	0
	9.121	203	203	203	0	0	0	0	3796.55		152	50.277	6353						810558						810558			602	77.274	2924						683378
	9.181	610	0	0	0	0	0	0	1893.61		153	50.337	3630	3630	3932	-302	91204		728937	728937	861807	-132870	1.76544e+10		728937			603	77.334	3932	3932	3226	706	498436		637820	637820	668192	-30372.4	9.22481e+08
	9.241	0	0	0	0	524	0	0	3796.55		154	50.397	3932						861807						861807			604	77.394	3226						668192
	9.301	0	0	0	0	0	0	0	3796.55		155	50.457	4134	4134	6050	-1916	3671056		854214	854214	808636	45577.2	2.07729e+09		854214			605	77.454	3428	3428	3630	-202	40804		694759	694759	670058	24700.9	6.10133e+08
	9.361	0	203	0	0	0	0	0	5690.16		156	50.517	6050						808636						808636			606	77.514	3630						670058
	9.421	407	0	0	0	0	0	0	3796.55		157	50.577	5949	5949	5243	706	498436		827647	827647	899754	-72106.4	5.19933e+09		827647			607	77.574	2621	2621	5445	-2824	7974976		700430	700430	708042	-7611.75	5.79387e+07
	9.481	203	0	0	0	0	0	0	3796.55		158	50.637	5243						899754						899754			608	77.634	5445						708042
	9.541	0	0	0	0	0	0	0	3796.55		159	50.697	6454	6454	3731	2723	7414729		802965	802965	696662	106303	1.13004e+10		802965			609	77.694	3529	3529	2621	908	824464		632111	632111	573279	58832.5	3.46126e+09
	9.601	610	407	0	0	0	0	0	3796.55		160	50.757	3731						696662						696662			610	77.754	2621						573279
	9.661	0	0	0	100	0	0	0	1893.61		161	50.817	5748	5748	3932	1816	3297856		852292	852292	776380	75912.2	5.76267e+09		852292			611	77.814	4336	4336	3831	505	255025		706158	706158	696662	9496.06	9.01752e+07
	9.721	1017	0	0	0	0	0	0	3796.55		162	50.877	3932						776380						776380			612	77.874	3831						696662
	9.781	610	407	0	0	0	0	0	1893.61		163	50.937	3831	3831	5143	-1312	1721344		827647	827647	903560	-75912.2	5.76267e+09		827647			s(Imean)		70.6375			73.1679	73.2262		4770.68			4522.32	4593.75
	9.841	203	0	0	0	0	0	0	1893.61		164	50.997	5143						903560						903560
	9.901	0	0	203	0	0	0	0	3796.55		165	51.057	5445	5445	3731	1714	2937796		890276	890276	801062	89214.2	7.95917e+09		890276
	9.961	0	0	0	201	0	0	0	3796.55		166	51.117	3731						801062						801062
	10.021	0	203	0	0	0	0	0	1893.61		167	51.177	5647	5647	6454	-807	651249		863710	863710	899754	-36043.9	1.29916e+09		863710
	10.081	0	407	0	0	0	0	0	1893.61		168	51.237	6454						899754						899754
	10.141	407	407	0	0	0	0	0	1893.61		169	51.297	6756	6756	3932	2824	7974976		818151	818151	719441	98710.2	9.7437e+09		818151
	10.201	407	610	0	0	0	0	0	1893.61		170	51.357	3932						719441						719441
	10.261	203	407	0	0	0	0	0	1893.61		171	51.417	3932	3932	5042	-1110	1232100		840930	840930	827647	13283.2	1.76445e+08		840930
	10.321	0	203	0	0	0	0	0	1893.61		172	51.477	5042						827647						827647
	10.381	814	407	0	0	0	0	0	3796.55		173	51.537	3428	3428	4638	-1210	1464100		753601	753601	806752	-53151.7	2.8251e+09		753601
	10.441	0	0	0	0	0	0	0	3796.55		174	51.597	4638						806752						806752
	10.501	0	203	0	0	0	0	0	1893.61		175	51.657	4437	4437	5344	-907	822649		793469	793469	721325	72143.8	5.20472e+09		793469
	10.561	0	610	0	100	0	0	0	1893.61		176	51.717	5344						721325						721325
	10.621	0	0	0	0	0	0	0	1893.61		177	51.777	5042	5042	4235	807	651249		766902	766902	846621	-79718.1	6.35498e+09		766902
	10.681	407	407	0	0	0	0	0	1893.61		178	51.837	4235						846621						846621
	10.741	0	0	0	0	0	0	0	1893.61		179	51.897	3731	3731	5344	-1613	2601769		776380	776380	709945	66434.9	4.4136e+09		776380
	10.801	0	203	0	0	0	0	0	3796.55		180	51.957	5344						709945						709945	8.82566e+07
	10.861	0	0	0	0	0	0	0	3796.55		181	52.017	3932	3932	4840	-908	824464		865613	865613	854214	11398.9	1.29936e+08		865613
	10.921	0	407	0	0	0	0	0	1893.61		182	52.077	4840						854214						854214
	10.981	0	610	0	100	0	0	0	1893.61		183	52.137	4638	4638	4537	101	10201		755504	755504	812442	-56938.9	3.24204e+09		755504
	11.041	203	203	0	0	0	1048	0	1893.61		184	52.197	4537						812442						812442
	11.101	0	407	0	0	0	0	0	3796.55		185	52.257	4336	4336	4235	101	10201		888392	888392	757406	130986	1.71572e+10		888392
	11.161	610	0	0	0	0	0	0	0		186	52.317	4235						757406						757406
	11.221	407	203	0	0	0	0	0	0		187	52.377	3025	3025	4739	-1714	2937796		812442	812442	985199	-172757	2.98449e+10		812442
	11.281	203	203	0	0	0	0	0	1893.61		188	52.437	4739						985199						985199
	11.341	0	0	0	0	0	0	0	3796.55		189	52.497	5042	5042	4840	202	40804		746008	746008	721325	24682.2	6.09213e+08		746008
	11.401	610	203	0	0	0	0	0	1893.61		190	52.557	4840						721325						721325
	11.461	0	0	0	100	0	0	0	1893.61		191	52.617	4638	4638	6050	-1412	1993744		850426	850426	780186	70240.8	4.93376e+09		850426
	11.521	203	407	0	0	0	0	0	1893.61		192	52.677	6050						780186						780186
	11.581	0	407	0	0	0	0	0	3796.55		193	52.737	3831	3831	3125	706	498436		808636	808636	761175	47461.5	2.25259e+09		808636
	11.641	0	0	0	0	0	0	0	1893.61		194	52.797	3125						761175						761175
	11.701	407	203	0	0	0	0	0	3796.55		195	52.857	5445	5445	3831	1614	2604996		820054	820054	787779	32275.3	1.0417e+09		820054
	11.761	610	0	0	0	0	0	0	1893.61		196	52.917	3831						787779						787779
	11.821	407	203	0	0	0	0	0	1893.61		197	52.977	4941	4941	4437	504	254016		818151	818151	842815	-24663.6	6.08291e+08		818151
	11.881	0	0	0	0	0	0	0	3796.55		198	53.037	4437						842815						842815
	11.941	203	0	0	0	0	0	0	3796.55		199	53.097	4033	4033	3831	202	40804		768787	768787	683378	85408.3	7.29458e+09		768787
	12.001	407	610	0	0	0	0	0	3796.55		200	53.157	3831						683378						683378
	12.061	407	203	0	0	0	0	0	1893.61		201	53.217	4638	4638	6454	-1816	3297856		922552	922552	761175	161377	2.60424e+10		922552
	12.121	0	0	0	0	0	0	0	5690.16		202	53.277	6454						761175						761175
	12.181	0	203	0	0	0	0	0	3796.55		203	53.337	3731	3731	4235	-504	254016		696662	696662	734608	-37946.8	1.43996e+09		696662
	12.241	203	0	0	0	0	0	0	1893.61		204	53.397	4235						734608						734608
	12.301	407	203	0	100	0	0	0	1893.61		205	53.457	3731	3731	4941	-1210	1464100		837125	837125	715635	121490	1.47597e+10		837125
	12.361	0	0	0	0	0	0	0	3796.55		206	53.517	4941						715635						715635
	12.421	0	203	0	0	0	0	0	1893.61		207	53.577	3428	3428	4336	-908	824464		780186	780186	844718	-64531.9	4.16437e+09		780186
	12.481	0	203	0	0	0	0	0	3796.55		208	53.637	4336						844718						844718
	12.541	0	0	203	0	524	0	0	3796.55		209	53.697	5042	5042	2520	2522	6360484		783973	783973	689069	94904.3	9.00683e+09		783973
	12.601	203	203	0	0	0	0	0	1893.61		210	53.757	2520						689069						689069
	12.661	203	0	0	0	0	0	0	3796.55		211	53.817	5243	5243	6555	-1312	1721344		859904	859904	783973	75930.9	5.76551e+09		859904
	12.721	203	203	0	0	0	0	0	3796.55		212	53.877	6555						783973						783973
	12.781	0	0	0	0	0	0	0	0		213	53.937	5546	5546	3125	2421	5861241		766902	766902	859904	-93001.4	8.64926e+09		766902
	12.841	203	0	0	0	0	0	0	1893.61		214	53.997	3125						859904						859904
	12.901	0	203	0	0	0	0	0	1893.61		215	54.056	6958	6958	3731	3227	10413529		846621	846621	782070	64550.6	4.16678e+09		846621
	12.961	1017	203	0	0	0	0	0	3796.55		216	54.116	3731						782070						782070	1.19302e+08
	13.021	814	0	0	0	0	0	0	3796.55		217	54.176	4537	4537	4437	100	10000		755504	755504	884586	-129083	1.66623e+10		755504
	13.081	814	0	0	0	0	0	0	3796.55		218	54.236	4437						884586						884586
	13.141	610	0	0	0	0	0	0	1893.61		219	54.296	4941	4941	3731	1210	1464100		802965	802965	774496	28469.4	8.10509e+08		802965
	13.201	1221	0	610	0	0	0	0	3796.55		220	54.356	3731						774496						774496
	13.261	814	0	0	0	0	0	0	1893.61		221	54.416	5042	5042	3226	1816	3297856		816248	816248	852292	-36043.9	1.29916e+09		816248
	13.321	203	0	0	0	0	0	0	1893.61		222	54.476	3226						852292						852292
	13.381	0	610	0	0	0	0	0	1893.61		223	54.536	3529	3529	3327	202	40804		799159	799159	852292	-53133	2823115689		799159
	13.441	0	407	203	0	0	0	0	3796.55		224	54.596	3327						852292						852292
	13.501	814	203	407	0	0	0	0	1893.61		225	54.656	6151	6151	5243	908	824464		854214	854214	801062	53151.7	2.8251e+09		854214
	13.561	407	203	0	0	0	0	0	1893.61		226	54.716	5243						801062						801062
	13.62	407	0	0	100	0	0	0	3796.55		227	54.776	4134	4134	6756	-2622	6874884		865613	865613	932048	-66434.9	4.4136e+09		865613
	13.68	203	0	0	0	0	0	0	0		228	54.836	6756						932048						932048
	13.74	407	1017	0	0	0	0	0	3796.55		229	54.896	6353	6353	4638	1715	2941225		810558	810558	727034	83524.1	6.97627e+09		810558
	13.8	203	0	0	0	0	0	0	1893.61		230	54.956	4638						727034						727034
	13.86	203	203	0	0	0	0	0	1893.61		231	55.016	4739	4739	4336	403	162409		810558	810558	776380	34178.2	1.16815e+09		810558
	13.92	203	407	0	100	0	0	0	1893.61		232	55.076	4336						776380						776380
	13.98	203	0	0	0	0	0	0	5690.16		233	55.136	4235	4235	5344	-1109	1229881		761175	761175	787779	-26603.8	7.07763e+08		761175
	14.04	610	0	0	0	0	0	0	1893.61		234	55.196	5344						787779						787779
	14.1	610	610	0	0	0	0	126	1893.61		235	55.256	3932	3932	5143	-1211	1466521		850426	850426	660580	189846	36041503716		850426
	14.16	407	407	0	0	0	0	0	1893.61		236	55.316	5143						660580						660580
	14.22	0	0	0	100	0	0	0	5690.16		237	55.376	2722	2722	3226	-504	254016		713751	713751	747892	-34140.9	1.1656e+09		713751
	14.28	203	0	0	0	0	0	0	0		238	55.436	3226						747892						747892
	14.34	407	0	0	0	0	0	0	1893.61		239	55.496	3125	3125	5143	-2018	4072324		708042	708042	656775	51267.4	2.62834e+09		708042
	14.4	0	407	0	100	0	0	0	1893.61		240	55.556	5143						656775						656775
	14.46	203	610	0	100	0	0	0	1893.61		241	55.616	4941	4941	5243	-302	91204		801062	801062	833337	-32275.3	1.0417e+09		801062
	14.52	0	0	0	0	0	0	0	1893.61		242	55.676	5243						833337						833337
	14.58	610	0	0	0	0	0	0	1893.61		243	55.736	5243	5243	3529	1714	2937796		728937	728937	753601	-24663.6	6.08291e+08		728937
	14.64	203	0	0	0	524	0	0	1893.61		244	55.796	3529						753601						753601
	14.7	203	0	0	0	0	0	0	3796.55		245	55.856	5344	5344	5647	-303	91809		835240	835240	842815	-7574.44	5.73721e+07		835240
	14.76	610	407	0	0	0	1572	0	1893.61		246	55.916	5647						842815						842815
	14.82	814	0	0	0	0	0	0	0		247	55.976	4033	4033	5243	-1210	1464100		846621	846621	894082	-47461.5	2.25259e+09		846621
	14.88	203	0	0	0	0	0	0	0		248	56.036	5243						894082						894082
	14.94	407	0	0	0	0	0	0	0		249	56.096	4941	4941	3932	1009	1018081		831434	831434	734608	96825.9	9.37526e+09		831434
	15	814	0	0	0	0	0	0	3796.55		250	56.156	3932						734608						734608
	15.06	814	203	0	0	0	0	0	1893.61		251	56.216	4638	4638	4739	-101	10201		821920	821920	787779	34140.9	1.1656e+09		821920
	15.12	203	0	0	0	0	0	0	3796.55		252	56.276	4739						787779						787779	1.08868e+08
	15.18	203	0	0	0	524	0	0	1893.61		253	56.336	2722	2722	3932	-1210	1464100		778264	778264	732724	45539.9	2.07388e+09		778264
	15.24	407	0	0	0	0	0	0	1893.61		254	56.396	3932						732724						732724
	15.3	407	814	0	0	0	0	0	3796.55		255	56.456	4437	4437	2924	1513	2289169		818151	818151	820054	-1902.94	3.62117e+06		818151
	15.36	814	203	0	0	0	0	0	3796.55		256	56.516	2924						820054						820054
	15.42	0	0	0	0	0	0	0	1893.61		257	56.576	4033	4033	5243	-1210	1464100		744123	744123	894082	-149959	2.24877e+10		744123
	15.48	0	203	0	0	0	0	0	1893.61		258	56.636	5243						894082						894082
	15.54	0	407	0	0	0	0	0	1893.61		259	56.696	5445	5445	4235	1210	1464100		827647	827647	791547	36099.9	1.3032e+09		827647
	15.6	610	0	0	0	0	0	0	3796.55		260	56.756	4235						791547						791547
	15.66	203	407	0	0	0	0	0	1893.61		261	56.816	3327	3327	6958	-3631	13184161		859904	859904	880799	-20895	436601025		859904
	15.72	407	203	0	0	0	0	0	3796.55		262	56.876	6958						880799						880799
	15.78	0	0	0	0	0	0	0	1893.61		263	56.936	5243	5243	5344	-101	10201		774496	774496	751698	22797.9	5.19746e+08		774496
	15.84	203	0	0	0	0	0	0	3796.55		264	56.996	5344						751698						751698
	15.9	203	203	0	0	0	0	0	1893.61		265	57.056	3831	3831	5949	-2118	4485924		863710	863710	759309	104400	1.08994e+10		863710
	15.96	203	0	0	0	0	0	0	3796.55		266	57.116	5949						759309						759309
	16.02	203	0	0	100	0	0	0	3796.55		267	57.176	3831	3831	7261	-3430	11764900		810558	810558	814345	-3787.19	1.43428e+07		810558
	16.08	203	610	0	0	0	0	0	5690.16		268	57.236	7261						814345						814345
	16.14	0	203	0	0	0	0	0	1893.61		269	57.296	4437	4437	5243	-806	649636		736530	736530	753601	-17070.4	2.914e+08		736530
	16.2	407	203	0	0	0	0	0	3796.55		270	57.356	5243						753601						753601
	16.26	203	0	0	0	0	0	0	1893.61		271	57.416	4134	4134	5042	-908	824464		802965	802965	808636	-5671.5	3.21659e+07		802965
	16.32	814	203	0	0	0	0	0	1893.61		272	57.476	5042						808636						808636
	16.38	814	0	0	0	0	0	0	0		273	57.536	5143	5143	4638	505	255025		772593	772593	708042	64550.6	4.16678e+09		772593
	16.44	0	0	0	100	0	0	0	0		274	57.596	4638						708042						708042
	16.5	407	203	0	0	0	0	0	3796.55		275	57.656	5949	5949	4033	1916	3671056		901675	901675	787779	113896	1.29724e+10		901675
	16.56	0	203	0	0	0	0	0	1893.61		276	57.716	4033						787779						787779
	16.62	203	0	407	0	0	0	126	3796.55		277	57.776	4537	4537	4638	-101	10201		749813	749813	882664	-132851	1.76494e+10		749813
	16.68	203	0	0	0	0	0	0	3796.55		278	57.836	4638						882664						882664
	16.74	0	0	0	0	0	0	0	3796.55		279	57.896	4739	4739	5849	-1110	1232100		839009	839009	725131	113878	1.29681e+10		839009
	16.8	203	0	0	0	0	0	0	5690.16		280	57.956	5849						725131						725131
	16.86	1424	0	0	0	0	0	0	1893.61		281	58.016	4638	4638	5042	-404	163216		778264	778264	882664	-104400	1.08994e+10		778264
	16.92	0	203	0	0	0	0	0	3796.55		282	58.076	5042						882664						882664
	16.98	0	0	0	0	0	0	0	3796.55		283	58.136	3529	3529	4437	-908	824464		749813	749813	835240	-85426.9	7.29776e+09		749813
	17.04	203	203	0	0	0	0	0	3796.55		284	58.196	4437						835240						835240
	17.1	1017	0	0	0	0	0	126	3796.55		285	58.256	5748	5748	3932	1816	3297856		863710	863710	774496	89214.2	7.95917e+09		863710
	17.16	0	203	0	0	0	1048	0	1893.61		286	58.316	3932						774496						774496
	17.22	0	203	203	0	524	0	0	3796.55		287	58.376	4235	4235	2722	1513	2289169		687147	687147	776380	-89232.9	7.96251e+09		687147
	17.28	814	203	0	0	0	0	0	1893.61		288	58.436	2722						776380						776380	8.6565e+07
	17.34	203	0	0	0	0	0	0	3796.55		289	58.496	5143	5143	4840	303	91809		736530	736530	696662	39868.4	1.58949e+09		736530
	17.4	407	203	0	0	0	0	0	3796.55		290	58.556	4840						696662						696662
	17.46	610	203	0	0	0	0	0	1893.61		291	58.616	6353	6353	4537	1816	3297856		806752	806752	865613	-58860.4	3.46455e+09		806752
	17.52	203	0	0	0	0	0	0	3796.55		292	58.676	4537						865613						865613
	17.58	610	0	0	0	0	0	0	3796.55		293	58.736	3529	3529	3428	101	10201		660580	660580	746008	-85427	7297772329		660580
	17.64	0	0	0	100	0	0	0	3796.55		294	58.796	3428						746008						746008
	17.7	0	0	0	100	0	0	0	1893.61		295	58.856	5243	5243	5143	100	10000		755504	755504	774496	-18992.1	3.60698e+08		755504
	17.76	407	407	0	0	0	0	0	0		296	58.916	5143						774496						774496
	17.82	0	814	0	0	0	0	0	1893.61		297	58.976	3932	3932	5143	-1211	1466521		785876	785876	821920	-36043.9	1.29916e+09		785876
	17.88	407	203	0	0	0	1048	0	1893.61		298	59.036	5143						821920						821920
	17.94	0	0	0	201	524	0	0	3796.55		299	59.096	5949	5949	4134	1815	3294225		706158	706158	753601	-47442.8	2.25082e+09		706158
	18	0	0	0	100	0	0	0	3796.55		300	59.156	4134						753601						753601
	18.06	814	0	0	0	0	0	0	3796.55		301	59.216	5849	5849	4739	1110	1232100		782070	782070	759309	22760.6	5.18046e+08		782070
	18.12	203	203	203	0	0	0	0	5690.16		302	59.276	4739						759309						759309
	18.18	814	203	0	100	0	0	0	1893.61		303	59.336	4336	4336	4840	-504	254016		725131	725131	706158	18973.4	3.59989e+08		725131
	18.24	0	407	0	0	0	0	0	1893.61		304	59.396	4840						706158						706158
	18.3	0	203	0	0	0	0	0	3796.55		305	59.456	4336	4336	4134	202	40804		787779	787779	740317	47461.5	2.25259e+09		787779
	18.36	0	203	0	0	0	0	0	1893.61		306	59.516	4134						740317						740317
	18.42	0	0	0	0	0	0	0	1893.61		307	59.576	3831	3831	5748	-1917	3674889		730803	730803	909268	-178466	3.185e+10		730803
	18.48	407	0	0	0	0	0	0	0		308	59.636	5748						909268						909268
	18.54	610	0	0	0	0	0	0	3796.55		309	59.696	5445	5445	3731	1714	2937796		785876	785876	694759	91117.1	8.30233e+09		785876
	18.6	407	0	0	0	0	0	0	1893.61		310	59.756	3731						694759						694759
	18.66	407	203	0	0	0	0	0	1893.61		311	59.816	4739	4739	4638	101	10201		840930	840930	837125	3805.88	1.44847e+07		840930
	18.72	203	0	0	0	0	0	0	1893.61		312	59.876	4638						837125						837125
	18.78	203	0	0	0	0	0	0	3796.55		313	59.936	6454	6454	4033	2421	5861241		812442	812442	812442	0	0		812442
	18.84	407	203	407	0	0	0	0	1893.61		314	59.996	4033						812442						812442
	18.9	407	0	0	0	0	0	379	1893.61		315	60.056	3630	3630	4941	-1311	1718721		837125	837125	728937	108188	1.17046e+10		837125
	18.96	0	407	0	0	0	0	0	3796.55		316	60.116	4941						728937						728937
	19.02	203	0	0	0	0	0	0	1893.61		317	60.176	5042	5042	4537	505	255025		742220	742220	793469	-51248.8	2.62643e+09		742220
	19.08	0	203	0	0	0	0	0	3796.55		318	60.236	4537						793469						793469
	19.14	0	203	0	100	0	0	0	3796.55		319	60.296	3025	3025	3428	-403	162409		776380	776380	651103	125277	1.56943e+10		776380
	19.2	407	0	0	0	0	0	0	1893.61		320	60.356	3428						651103						651103
	19.26	0	0	0	0	0	0	0	1893.61		321	60.416	5042	5042	3428	1614	2604996		835240	835240	766902	68337.8	4.67006e+09		835240
	19.32	203	0	0	201	0	0	0	3796.55		322	60.476	3428						766902						766902
	19.38	203	407	0	0	0	0	0	1893.61		323	60.536	3932	3932	3529	403	162409		675785	675785	666289	9496.06	9.01752e+07		675785
	19.44	0	203	0	0	0	0	0	1893.61		324	60.596	3529						666289						666289	1.02325e+08
	19.5	203	0	0	0	0	0	0	3796.55		325	60.656	5445	5445	3932	1513	2289169		821920	821920	715635	106285	1.12964e+10		821920
	19.56	0	610	0	0	0	0	0	3796.55		326	60.716	3932						715635						715635
	19.62	203	203	0	0	0	0	0	3796.55		327	60.776	3630	3630	4235	-605	366025		664386	664386	791547	-127161	16169919921		664386
	19.68	203	1221	0	0	0	0	0	3796.55		328	60.836	4235			0	0		791547						791547
	19.74	0	0	0	0	0	0	0	1893.61		329	60.896	3529	3529	4638	-1109	1229881		734608	734608	759309	-24700.9	6.10133e+08		734608
	19.8	407	0	407	0	0	0	0	1893.61		330	60.956	4638						759309						759309
	19.86	814	1017	0	0	0	0	0	3796.55		331	61.016	4437	4437	5344	-907	822649		821920	821920	907365	-85445.6	7.30095e+09		821920
	19.92	203	0	203	0	0	0	0	3796.55		332	61.076	5344						907365						907365
	19.98	407	0	0	0	0	0	0	3796.55		333	61.136	5445	5445	6050	-605	366025		715635	715635	742220	-26585.1	7.06769e+08		715635
	20.04	407	0	0	0	0	0	0	1893.61		334	61.196	6050						742220						742220
	20.1	203	0	0	0	0	0	0	3796.55		335	61.256	5445	5445	4840	605	366025		814345	814345	774496	39849.8	1.588e+09		814345
	20.16	0	0	0	0	0	0	0	3796.55		336	61.316	4840						774496						774496
	20.22	1017	0	0	0	0	0	0	3796.55		337	61.376	2520	2520	4134	-1614	2604996		690953	690953	770690	-79736.8	6.35796e+09		690953
	20.28	0	203	0	0	0	0	0	1893.61		338	61.436	4134						770690						770690
	20.34	407	203	0	0	0	0	0	1893.61		339	61.496	4638	4638	3226	1412	1993744		749813	749813	677670	72143.8	5.20472e+09		749813
	20.4	203	0	0	0	0	0	0	1893.61		340	61.556	3226						677670						677670
	20.46	203	1221	0	0	0	0	0	1893.61		341	61.616	5344	5344	4537	807	651249		768787	768787	793469	-24682.2	6.09213e+08		768787
	20.52	1221	203	0	0	0	0	0	3796.55		342	61.676	4537						793469						793469
	20.58	203	0	0	0	0	0	0	3796.55		343	61.736	3226	3226	2722	504	254016		776380	776380	761175	15204.9	2.31188e+08		776380
	20.64	1628	0	0	0	0	0	0	3796.55		344	61.796	2722						761175						761175
	20.7	203	0	0	201	0	0	0	3796.55		345	61.856	3630	3630	4840	-1210	1464100		865613	865613	734608	131004	1.71621e+10		865613
	20.76	203	203	0	0	0	0	0	3796.55		346	61.916	4840						734608						734608
	20.82	0	610	0	0	0	0	379	3796.55		347	61.976	4739	4739	2621	2118	4485924		692856	692856	816248	-123392	1.52257e+10		692856
	20.88	0	407	0	0	0	0	0	1893.61		348	62.036	2621						816248						816248
	20.94	407	203	0	0	0	0	0	3796.55		349	62.096	4537	4537	2823	1714	2937796		791547	791547	660580	130967	1.71523e+10		791547
	21	203	0	0	0	0	0	0	1893.61		350	62.156	2823						660580						660580
	21.06	0	0	0	0	0	0	0	1893.61		351	62.216	4033	4033	6050	-2017	4068289		772593	772593	751698	20895	436601025		772593
	21.12	0	0	0	0	0	0	0	3796.55		352	62.276	6050						751698						751698
	21.18	407	0	0	0	0	0	0	1893.61		353	62.336	3932	3932	4638	-706	498436		713751	713751	685263	28488.1	8.1157e+08		713751
	21.24	610	203	0	0	0	0	0	1893.61		354	62.396	4638						685263						685263
	21.3	1017	0	0	0	0	0	0	3796.55		355	62.456	3428	3428	3630	-202	40804		679573	679573	694759	-15186.2	2.3062e+08		679573
	21.36	610	610	407	0	0	0	0	3796.55		356	62.516	3630						694759						694759
	21.42	203	0	0	0	0	0	0	3796.55		357	62.576	4336	4336	3932	404	163216		662483	662483	789682	-127198	1.61794e+10		662483
	21.48	610	0	0	0	0	0	0	1893.61		358	62.636	3932						789682						789682
	21.54	407	0	203	0	0	0	0	1893.61		359	62.696	5143	5143	4336	807	651249		685263	685263	635917	49345.8	2.43501e+09		685263
	21.6	407	407	0	0	0	0	0	3796.55		360	62.756	4336						635917						635917	1.07096e+08
	21.66	0	610	203	0	0	0	0	3796.55		361	62.816	3731	3731	3831	-100	10000		797275	797275	795353	1921.62	3.69264e+06		797275
	21.72	610	0	0	0	0	0	0	1893.61		362	62.876	3831						795353						795353
	21.78	0	0	0	0	0	0	0	1893.61		363	62.936	5546	5546	3731	1815	3294225		732724	732724	702352	30372.4	9.22481e+08		732724
	21.84	407	0	0	0	0	0	0	1893.61		364	62.996	3731						702352						702352
	21.9	0	0	0	0	0	0	0	0		365	63.056	5143	5143	4941	202	40804		757406	757406	711848	45558.6	2.07558e+09		757406
	21.96	0	203	0	201	0	0	0	0		366	63.116	4941						711848						711848
	22.02	0	0	0	0	0	0	0	0		367	63.176	4537	4537	4638	-101	10201		649200	649200	808636	-159436	2.54199e+10		649200
	22.08	610	407	0	0	0	0	0	3796.55		368	63.236	4638						808636						808636
	22.14	814	407	0	0	0	0	0	3796.55		369	63.296	4134	4134	4437	-303	91809		772593	772593	671980	100613	1.0123e+10		772593
	22.2	0	0	0	100	0	0	253	3796.55		370	63.356	4437						671980						671980
	22.26	610	0	0	0	0	0	0	3796.55		371	63.416	3630	3630	3529	101	10201		723228	723228	755504	-32275.3	1.0417e+09		723228
	22.32	610	0	0	0	0	0	0	3796.55		372	63.476	3529						755504						755504
	22.38	407	0	0	0	0	0	0	3796.55		373	63.536	3932	3932	3731	201	40401		725131	725131	742220	-17089.1	2.92038e+08		725131
	22.44	407	0	0	0	0	0	0	1893.61		374	63.596	3731						742220						742220
	22.5	203	0	0	0	0	0	0	3796.55		375	63.656	4840	4840	5143	-303	91809		802965	802965	764981	37984.1	1.44279e+09		802965
	22.56	0	0	203	0	0	0	0	3796.55		376	63.716	5143						764981						764981
	22.62	203	0	0	0	0	0	0	1893.61		377	63.776	3932	3932	4840	-908	824464		694759	694759	793469	-98710.2	9.74371e+09		694759
	22.68	0	407	0	0	0	0	0	3796.55		378	63.836	4840						793469						793469
	22.74	814	0	0	0	0	0	0	3796.55		379	63.896	3731	3731	3932	-201	40401		795353	795353	721325	74028	5480144784		795353
	22.8	203	0	0	0	0	0	0	1893.61		380	63.956	3932						721325						721325
	22.86	1017	407	0	0	0	0	0	3796.55		381	64.016	4033	4033	4437	-404	163216		821920	821920	789682	32238	1039288644		821920
	22.92	610	203	0	0	0	0	0	1893.61		382	64.076	4437						789682						789682
	22.98	203	203	0	0	0	0	0	1893.61		383	64.136	3529	3529	3125	404	163216		776380	776380	654890	121490	1.47597e+10		776380
	23.04	407	610	0	0	0	0	0	1893.61		384	64.196	3125						654890						654890
	23.1	814	0	407	0	0	0	0	1893.61		385	64.255	5143	5143	4941	202	40804		742220	742220	711848	30372.4	9.22481e+08		742220
	23.16	203	0	0	0	0	0	0	1893.61		386	64.315	4941						711848						711848
	23.22	610	0	0	0	0	0	0	1893.61		387	64.375	2722	2722	3025	-303	91809		666289	666289	776380	-110091	1.21199e+10		666289
	23.28	203	407	0	0	0	0	0	3796.55		388	64.435	3025						776380						776380
	23.34	407	0	0	0	0	0	0	3796.55		389	64.495	4537	4537	3731	806	649636		696662	696662	709945	-13283.2	1.76445e+08		696662
	23.4	407	0	0	0	0	0	0	1893.61		390	64.555	3731						709945						709945
	23.46	0	0	0	0	0	0	0	1893.61		391	64.615	4840	4840	5243	-403	162409		708042	708042	795353	-87311.2	7.62325e+09		708042
	23.52	203	203	0	0	0	0	0	3796.55		392	64.675	5243						795353						795353
	23.58	407	203	203	0	0	0	0	3796.55		393	64.735	6353	6353	3428	2925	8555625		753601	753601	759309	-5708.81	3.25905e+07		753601
	23.64	203	203	0	0	0	0	0	1893.61		394	64.795	3428						759309						759309
	23.699	0	610	0	0	0	0	0	1893.61		395	64.855	5344	5344	3529	1815	3294225		763097	763097	685263	77833.9	6.05811e+09		763097
	23.759	0	203	0	0	0	0	0	1893.61		396	64.915	3529						685263						685263	6.13043e+07
	23.819	0	0	0	0	0	0	0	1893.61		397	64.975	2520	2520	4033	-1513	2289169		662483	662483	746008	-83524.1	6.97627e+09		662483
	23.879	203	0	0	0	0	0	0	3796.55		398	65.035	4033						746008						746008
	23.939	0	0	0	0	0	0	0	3796.55		399	65.095	4336	4336	3327	1009	1018081		778264	778264	689069	89195.5	7.95584e+09		778264
	23.999	407	0	0	0	0	0	0	3796.55		400	65.155	3327						689069						689069
	24.059	0	0	0	0	0	0	0	1893.61		401	65.215	3327	3327	2924	403	162409		770690	770690	806752	-36062.6	1.30051e+09		770690
	24.119	0	814	0	0	0	0	126	3796.55		402	65.275	2924						806752						806752
	24.179	0	814	0	0	0	0	0	3796.55		403	65.335	5647	5647	3529	2118	4485924		730803	730803	677670	53133	2823115689		730803
	24.239	0	0	0	0	0	0	0	1893.61		404	65.395	3529						677670						677670
	24.299	203	0	0	0	0	0	0	3796.55		405	65.455	4638	4638	4437	201	40401		816248	816248	725131	91117.1	8.30233e+09		816248
	24.359	814	0	0	0	0	0	0	3796.55		406	65.515	4437						725131						725131
	24.419	814	0	0	0	0	0	0	3796.55		407	65.575	5042	5042	4638	404	163216		753601	753601	783973	-30372.4	9.22481e+08		753601
	24.479	0	0	0	0	0	0	0	0		408	65.635	4638						783973						783973
	24.539	0	0	0	0	0	0	0	1893.61		409	65.695	4336	4336	4134	202	40804		793469	793469	666289	127180	1.61747e+10		793469
	24.599	0	0	0	0	0	0	0	3796.55		410	65.755	4134						666289						666289
	24.659	610	0	0	0	0	0	0	3796.55		411	65.815	3226	3226	3428	-202	40804		723228	723228	764981	-41752.7	1.74329e+09		723228
	24.719	407	0	0	0	0	0	0	3796.55		412	65.875	3428						764981						764981
	24.779	0	203	0	0	0	0	0	1893.61		413	65.935	5243	5243	3932	1311	1718721		761175	761175	681476	79699.5	6.35201e+09		761175
	24.839	407	0	0	0	524	0	0	1893.61		414	65.995	3932						681476						681476
	24.899	407	0	0	0	0	0	0	1893.61		415	66.055	4336	4336	4336	0	0		825726	825726	776380	49345.8	2.435e+09		825726
	24.959	407	0	0	0	0	0	0	1893.61		416	66.115	4336						776380						776380
	25.019	610	0	0	0	0	0	0	1893.61		417	66.175	5949	5949	4941	1008	1016064		702352	702352	778264	-75912.2	5.76267e+09		702352
	25.079	407	0	0	0	0	0	0	1893.61		418	66.235	4941						778264						778264
	25.139	0	610	407	0	0	0	0	3796.55		419	66.295	3731	3731	4638	-907	822649		723228	723228	713751	9477.38	8.98206e+07		723228
	25.199	407	407	0	0	0	0	0	3796.55		420	66.355	4638						713751						713751
	25.259	610	610	0	0	0	0	0	3796.55		421	66.415	3932	3932	4840	-908	824464		757406	757406	751698	5708.81	3.25905e+07		757406
	25.319	0	0	0	0	0	0	0	3796.55		422	66.475	4840						751698						751698
	25.379	0	610	0	0	0	0	0	1893.61		423	66.535	2823	2823	4033	-1210	1464100		709945	709945	681476	28469.4	8.10509e+08		709945
	25.439	0	0	0	0	524	0	0	3796.55		424	66.595	4033						681476						681476
	25.499	610	0	0	0	0	0	0	1893.61		425	66.655	3529	3529	3831	-302	91204		753601	753601	730803	22797.9	5.19746e+08		753601
	25.559	203	0	0	0	0	0	0	3796.55		426	66.715	3831						730803						730803
	25.619	0	0	0	0	0	0	0	1893.61		427	66.775	4437	4437	4638	-201	40401		651103	651103	719441	-68337.9	4.67007e+09		651103
	25.679	203	0	0	0	0	0	0	3796.55		428	66.835	4638						719441						719441
	25.739	0	0	0	0	0	0	0	1893.61		429	66.895	5344	5344	4235	1109	1229881		715635	715635	709945	5690.19	3.23782e+07		715635
	25.799	0	407	0	201	0	0	0	3796.55		430	66.955	4235						709945						709945
	25.859	203	203	0	0	0	0	0	3796.55		431	67.015	4638	4638	4537	101	10201		801062	801062	747892	53170.3	2.82708e+09		801062
	25.919	407	0	0	0	0	0	0	1893.61		432	67.075	4537						747892						747892	5.69631e+07
	25.979	814	407	0	0	0	0	0	1893.61		433	67.135	3125	3125	3731	-606	367236		728937	728937	662483	66453.6	4.41608e+09		728937
	26.039	203	0	0	0	0	0	0	1893.61		434	67.195	3731						662483						662483
	26.099	0	0	0	0	0	0	0	1893.61		435	67.255	5546	5546	3831	1715	2941225		744123	744123	639686	104438	1.09072e+10		744123
	26.159	407	0	0	0	0	0	0	3796.55		436	67.315	3831						639686						639686
	26.219	203	0	0	0	0	0	0	3796.55		437	67.375	3831	3831	3831	0	0		647297	647297	789682	-142384	2.02733e+10		647297
	26.279	1424	407	0	0	0	0	0	1893.61		438	67.435	3831						789682						789682
	26.339	0	203	0	0	0	0	0	3796.55		439	67.495	4437	4437	3932	505	255025		698565	698565	575172	123392	1.52257e+10		698565
	26.399	407	203	0	0	0	0	0	1893.61		440	67.555	3932						575172						575172
	26.459	610	407	0	0	0	0	379	5690.16		441	67.615	4235	4235	5143	-908	824464		749813	749813	816248	-66434.9	4.41359e+09		749813
	26.519	814	610	0	0	0	0	0	1893.61		442	67.675	5143						816248						816248
	26.579	203	0	0	0	0	0	0	1893.61		443	67.735	2420	2420	3932	-1512	2286144		709945	709945	681476	28469.4	8.10509e+08		709945
	26.639	610	407	0	0	0	0	0	1893.61		444	67.795	3932						681476						681476
	26.699	203	407	0	0	0	0	0	3796.55		445	67.855	5949	5949	4437	1512	2286144		772593	772593	679573	93020.1	8.65273e+09		772593
	26.759	0	0	0	0	0	0	0	3796.55		446	67.915	4437						679573						679573
	26.819	610	203	0	0	0	0	0	3796.55		447	67.975	3529	3529	4134	-605	366025		715635	715635	787779	-72143.7	5.20471e+09		715635
	26.879	1017	203	203	0	0	0	0	1893.61		448	68.035	4134						787779						787779
	26.939	0	407	0	0	0	0	0	1893.61		449	68.095	4739	4739	4739	0	0		751698	751698	721325	30372.4	9.22481e+08		751698
	26.999	0	0	0	0	0	0	0	1893.61		450	68.155	4739						721325						721325
	27.059	407	0	0	0	0	0	0	1893.61		451	68.215	4336	4336	6353	-2017	4068289		740317	740317	747892	-7574.44	5.73721e+07		740317
	27.119	407	0	0	0	0	0	0	3796.55		452	68.275	6353						747892						747892
	27.179	0	0	0	0	0	0	0	3796.55		453	68.335	4739	4739	3428	1311	1718721		689069	689069	654890	34178.2	1.16815e+09		689069
	27.239	407	0	0	201	0	0	0	1893.61		454	68.395	3428						654890						654890
	27.299	0	610	0	0	0	0	0	3796.55		455	68.455	5344	5344	2218	3126	9771876		761175	761175	694759	66416.2	4.41112e+09		761175
	27.359	203	0	0	0	0	0	0	3796.55		456	68.515	2218						694759						694759
	27.419	407	0	0	100	0	0	0	3796.55		457	68.575	5243	5243	3226	2017	4068289		715635	715635	725131	-9496	90174016		715635
	27.479	814	203	0	0	0	0	0	1893.61		458	68.635	3226						725131						725131
	27.539	203	203	0	0	0	0	0	1893.61		459	68.695	3226	3226	4336	-1110	1232100		706158	706158	664386	41771.4	1.74485e+09		706158
	27.599	0	203	0	0	0	0	0	5690.16		460	68.755	4336						664386						664386
	27.659	407	0	0	0	0	0	0	5690.16		461	68.815	3529	3529	3428	101	10201		814345	814345	780186	34159.6	1.16688e+09		814345
	27.719	610	0	0	0	0	0	0	1893.61		462	68.875	3428						780186						780186
	27.779	407	814	0	0	0	0	0	3796.55		463	68.935	3125	3125	3731	-606	367236		679573	679573	715635	-36062.6	1.30051e+09		679573
	27.839	0	0	0	0	0	0	0	1893.61		464	68.995	3731						715635						715635
	27.899	0	203	0	0	0	0	0	3796.55		465	69.055	4134	4134	4537	-403	162409		696662	696662	742220	-45558.6	2.07558e+09		696662
	27.959	0	203	0	0	0	0	0	3796.55		466	69.115	4537						742220						742220
	28.019	0	0	0	0	0	0	0	1893.61		467	69.175	3226	3226	4941	-1715	2941225		647297	647297	772593	-125295	1.56989e+10		647297
	28.079	0	407	0	0	0	0	0	1893.61		468	69.235	4941						772593						772593	7.84062e+07
	28.139	0	0	0	0	0	0	0	1893.61		469	69.295	3529	3529	2823	706	498436		709945	709945	654890	55054.6	3.031e+09		709945
	28.199	203	407	0	0	0	524	0	3796.55		470	69.355	2823						654890						654890
	28.259	0	0	0	0	0	0	0	1893.61		471	69.415	4235	4235	3932	303	91809		804868	804868	816248	-11380.3	1.29512e+08		804868
	28.319	407	203	0	0	0	0	0	0		472	69.475	3932						816248						816248
	28.379	0	407	0	0	0	0	0	3796.55		473	69.535	3025	3025	3226	-201	40401		670058	670058	757406	-87348.6	7.62977e+09		670058
	28.439	0	203	0	0	0	0	0	1893.61		474	69.595	3226						757406						757406
	28.499	610	0	0	0	0	0	0	3796.55		475	69.655	2520	2520	4033	-1513	2289169		829532	829532	634014	195518	3.82271e+10		829532
	28.559	407	0	0	0	0	0	0	1893.61		476	69.715	4033						634014						634014
	28.619	0	0	0	0	0	0	0	3796.55		477	69.775	4437	4437	3731	706	498436		681476	681476	759309	-77833.9	6.05811e+09		681476
	28.679	407	0	203	100	0	0	0	5690.16		478	69.835	3731						759309						759309
	28.739	407	203	0	0	0	0	0	1893.61		479	69.895	5042	5042	4033	1009	1018081		736530	736530	628324	108206	1.17086e+10		736530
	28.799	203	0	0	0	0	0	0	3796.55		480	69.955	4033						628324						628324
	28.859	407	0	0	0	0	0	0	1893.61		481	70.015	3630	3630	4638	-1008	1016064		719441	719441	662483	56957.6	3.24416e+09		719441
	28.919	814	0	0	0	0	0	0	1893.61		482	70.075	4638						662483						662483
	28.979	407	0	0	0	0	0	0	3796.55		483	70.135	3831	3831	3125	706	498436		601748	601748	656775	-55026.6	3.02793e+09		601748
	29.039	407	0	0	0	0	0	0	1893.61		484	70.195	3125						656775						656775
	29.099	0	0	0	0	0	0	0	1893.61		485	70.255	3831	3831	5143	-1312	1721344		715635	715635	675785	39849.8	1.588e+09		715635
	29.159	610	203	0	0	0	0	0	3796.55		486	70.315	5143						675785						675785
	29.219	203	0	0	0	0	0	0	1893.61		487	70.375	4336	4336	4134	202	40804		704236	704236	799159	-94923	9010375929		704236
	29.279	610	203	0	0	0	0	0	1893.61		488	70.435	4134						799159						799159
	29.339	203	610	0	0	0	0	0	3796.55		489	70.495	3932	3932	3529	403	162409		711848	711848	685263	26585.1	7.06769e+08		711848
	29.399	407	0	0	0	0	0	0	1893.61		490	70.555	3529						685263						685263
	29.459	0	0	0	0	0	0	0	3796.55		491	70.615	4437	4437	3731	706	498436		751698	751698	696662	55035.9	3.02895e+09		751698
	29.519	814	0	0	0	0	0	0	3796.55		492	70.675	3731						696662						696662
	29.579	407	203	0	0	0	0	0	3796.55		493	70.735	4638	4638	3226	1412	1993744		687147	687147	685263	1884.25	3.5504e+06		687147
	29.639	0	0	0	0	0	0	0	3796.55		494	70.795	3226						685263						685263
	29.699	1628	407	0	0	0	0	0	3796.55		495	70.855	5445	5445	4638	807	651249		742220	742220	613119	129101	1.66671e+10		742220
	29.759	203	610	203	0	0	0	0	1893.61		496	70.915	4638						613119						613119
	29.819	407	0	0	0	0	0	0	1893.61		497	70.975	3428	3428	3831	-403	162409		647297	647297	723228	-75930.9	5.76551e+09		647297
	29.879	0	203	0	0	0	0	0	1893.61		498	71.035	3831						723228						723228
	29.939	407	203	0	0	0	0	0	1893.61		499	71.095	3831	3831	4134	-303	91809		653006	653006	634014	18992.1	3.60698e+08		653006
	29.999	610	0	203	0	0	0	0	3796.55		500	71.155	4134						634014						634014
	30.059	0	0	0	0	0	0	0	3796.55		501	71.215	4537	4537	4941	-404	163216		801062	801062	696662	104400	1.08994e+10		801062
	30.119	0	610	0	0	0	0	0	3796.55		502	71.275	4941						696662						696662
	30.179	0	203	0	201	0	0	0	5690.16		503	71.335	4537	4537	3529	1008	1016064		670058	670058	679573	-9514.69	9.05293e+07		670058
	30.239	0	1017	0	0	0	0	0	3796.55		504	71.395	3529						679573						679573	9.54028e+07
	30.299	0	407	0	0	524	0	0	1893.61		505	71.455	3932	3932	3831	101	10201		715635	715635	605545	110091	1.21199e+10		715635
	30.359	203	0	0	0	0	0	126	5690.16		506	71.515	3831						605545						605545
	30.419	0	0	0	100	0	0	0	1893.61		507	71.575	4033	4033	2319	1714	2937796		702352	702352	747892	-45539.9	2.07388e+09		702352
	30.479	407	1017	0	0	0	0	0	3796.55		508	71.635	2319						747892						747892
	30.539	610	814	0	0	0	0	0	1893.61		509	71.695	4739	4739	4033	706	498436		690953	690953	637820	53133	2823115689		690953
	30.599	0	203	0	0	0	0	0	1893.61		510	71.755	4033						637820						637820
	30.659	814	0	0	0	0	0	0	1893.61		511	71.815	3731	3731	4033	-302	91204		772593	772593	721325	51267.4	2.62834e+09		772593
	30.719	814	0	203	0	0	0	0	3796.55		512	71.875	4033						721325						721325
	30.779	0	0	0	0	0	0	0	1893.61		513	71.935	4739	4739	4033	706	498436		751698	751698	793469	-41771.4	1.74485e+09		751698
	30.839	203	0	0	201	0	0	0	3796.55		514	71.995	4033						793469						793469
	30.899	407	203	0	0	0	0	0	3796.55		515	72.055	4941	4941	5445	-504	254016		818151	818151	624518	193633	3.74938e+10		818151
	30.959	407	0	0	0	0	0	0	1893.61		516	72.115	5445						624518						624518
	31.019	203	0	0	0	0	0	0	1893.61		517	72.175	3731	3731	4739	-1008	1016064		660580	660580	782070	-121490	1.47597e+10		660580
	31.079	203	0	0	0	0	0	0	1893.61		518	72.235	4739						782070						782070
	31.139	0	203	0	0	0	0	0	1893.61		519	72.295	5143	5143	2420	2723	7414729		692856	692856	605545	87311.2	7.62325e+09		692856
	31.199	610	203	0	0	0	0	0	3796.55		520	72.355	2420						605545						605545
	31.259	610	203	0	0	0	0	0	1893.61		521	72.415	3731	3731	5546	-1815	3294225		764981	764981	711848	53133	2823115689		764981
	31.319	203	0	203	100	0	0	0	3796.55		522	72.475	5546						711848						711848
	31.379	0	0	0	0	0	0	0	3796.55		523	72.535	3428	3428	5647	-2219	4923961		626402	626402	744123	-117721	1.38582e+10		626402
	31.439	0	0	0	100	0	0	126	3796.55		524	72.595	5647						744123						744123
	31.499	407	0	203	0	0	0	0	1893.61		525	72.655	4638	4638	4638	0	0		848524	848524	622634	225890	5.10262e+10		848524
	31.559	203	0	0	0	0	0	0	1893.61		526	72.715	4638						622634						622634
	31.619	203	203	0	0	1048	0	0	1893.61		527	72.775	3327	3327	5546	-2219	4923961		683378	683378	727034	-43655.6	1.90581e+09		683378
	31.679	0	0	0	0	0	0	0	3796.55		528	72.835	5546						727034						727034
	31.739	203	0	0	100	0	0	0	3796.55		529	72.895	5042	5042	4235	807	651249		698565	698565	628324	70240.8	4.93376e+09		698565
	31.799	0	0	0	0	0	0	0	1893.61		530	72.955	4235						628324						628324
	31.859	407	203	0	0	524	1048	0	1893.61		531	73.015	3428	3428	5344	-1916	3671056		753601	753601	651103	102497	1.05057e+10		753601
	31.919	203	610	0	0	0	0	0	1893.61		532	73.075	5344						651103						651103
	31.979	0	0	203	0	0	0	0	3796.55		533	73.135	2722	2722	4840	-2118	4485924		651103	651103	689069	-37965.5	1.44138e+09		651103
	32.039	814	0	0	0	0	0	0	3796.55		534	73.195	4840						689069						689069
	32.099	0	0	0	0	0	0	0	3796.55		535	73.255	5647	5647	2924	2723	7414729		761175	761175	689069	72106.4	5.19933e+09		761175
	32.159	814	0	0	0	0	0	0	3796.55		536	73.315	2924						689069						689069
	32.219	407	203	0	0	0	0	0	1893.61		537	73.375	3125	3125	4638	-1513	2289169		681476	681476	683378	-1902.94	3.62117e+06		681476
	32.279	0	0	0	100	0	0	0	3796.55		538	73.435	4638						683378						683378
	32.339	0	0	0	0	0	0	0	1893.61		539	73.495	3025	3025	3630	-605	366025		592261	592261	653006	-60744.8	3.68992e+09		592261
	32.399	0	0	0	0	0	0	0	1893.61		540	73.555	3630						653006						653006	1.12261e+08
	32.459	203	203	0	0	0	0	0	3796.55		541	73.615	3025	3025	4638	-1613	2601769		677670	677670	666289	11380.3	1.29512e+08		677670
	32.519	203	814	0	0	0	0	0	3796.55		542	73.675	4638						666289						666289
	32.579	0	0	0	0	0	0	0	1893.61		543	73.735	3327	3327	3327	0	0		565686	565686	626402	-60716.8	3.68652e+09		565686
	32.639	0	0	0	0	0	0	0	3796.55		544	73.795	3327						626402						626402
	32.699	203	203	0	0	0	0	0	1893.61		545	73.855	4537	4537	3630	907	822649		766902	766902	668192	98710.2	9.74371e+09		766902
	32.759	610	0	0	201	0	0	0	1893.61		546	73.915	3630						668192						668192
	32.819	407	0	0	0	0	0	0	1893.61		547	73.975	5546	5546	5445	101	10201		654890	654890	757406	-102516	1.05095e+10		654890
	32.879	203	203	0	0	0	0	0	1893.61		548	74.035	5445						757406						757406
	32.939	203	0	0	0	0	0	0	3796.55		549	74.095	4437	4437	3630	807	651249		702352	702352	662483	39868.4	1.58949e+09		702352
	32.999	0	0	0	0	0	0	0	3796.55		550	74.155	3630						662483						662483
	33.059	610	203	0	0	0	0	0	1893.61		551	74.215	4537	4537	4638	-101	10201		728937	728937	630208	98728.9	9.74739e+09		728937
	33.119	0	203	0	0	0	0	0	1893.61		552	74.275	4638						630208						630208
	33.179	203	203	0	0	0	0	0	1893.61		553	74.334	2319	2319	3630	-1311	1718721		639686	639686	634014	5671.5	3.21659e+07		639686
	33.239	610	203	0	0	0	0	0	1893.61		554	74.395	3630						634014						634014
	33.299	0	0	0	0	0	0	0	3796.55		555	74.454	5243	5243	4537	706	498436		624518	624518	670058	-45539.9	2.07388e+09		624518
	33.359	610	203	0	0	0	0	0	3796.55		556	74.514	4537						670058						670058
	33.419	407	407	0	0	0	0	0	3796.55		557	74.574	4235	4235	4537	-302	91204		677670	677670	831434	-153765	2.36436e+10		677670
	33.479	0	203	0	0	0	0	0	1893.61		558	74.634	4537						831434						831434
	33.539	407	0	0	0	0	0	0	3796.55		559	74.694	4739	4739	5042	-303	91809		715635	715635	651103	64532	4164379024		715635
	33.599	203	407	0	0	0	0	0	3796.55		560	74.754	5042						651103						651103
	33.659	0	0	0	0	0	0	0	3796.55		561	74.814	4134	4134	3932	202	40804		730803	730803	685263	45539.9	2.07388e+09		730803
	33.719	0	0	0	0	0	0	0	1893.61		562	74.874	3932						685263						685263
	33.779	0	203	0	100	0	0	0	1893.61		563	74.934	3327	3327	4537	-1210	1464100		654890	654890	662483	-7593.06	5.76546e+07		654890
	33.839	203	0	0	0	0	0	0	1893.61		564	74.994	4537						662483						662483
	33.898	203	203	0	0	0	0	0	3796.55		565	75.054	5042	5042	2722	2320	5382400		732724	732724	626402	106322	11304367684		732724
	33.958	0	0	0	0	0	0	0	3796.55		566	75.114	2722						626402						626402
	34.018	0	814	203	0	0	0	0	1893.61		567	75.174	2621	2621	3226	-605	366025		662483	662483	732724	-70240.8	4.93377e+09		662483
	34.078	0	203	0	0	0	0	0	3796.55		568	75.234	3226						732724						732724
	34.138	0	203	0	0	0	0	0	3796.55		569	75.294	4537	4537	3125	1412	1993744		673864	673864	548596	125267	1.56919e+10		673864
	34.198	0	203	0	0	0	0	0	0		570	75.354	3125						548596						548596
	34.258	407	0	203	0	0	0	0	1893.61		571	75.414	5647	5647	3125	2522	6360484		668192	668192	634014	34178.2	1.16815e+09		668192
	34.318	0	203	203	100	0	0	0	3796.55		572	75.474	3125						634014						634014
	34.378	203	610	0	0	0	0	0	1893.61		573	75.534	3428	3428	4941	-1513	2289169		611244	611244	666289	-55045.2	3.02998e+09		611244
	34.438	0	0	0	0	0	0	0	3796.55		574	75.594	4941						666289						666289
	34.498	0	407	0	0	0	0	0	1893.61		575	75.654	3125	3125	4739	-1614	2604996		742220	742220	635917	106303	1.13004e+10		742220
	34.558	407	0	0	0	0	0	0	1893.61		576	75.714	4739						635917						635917	8.63325e+07
	34.618	203	0	0	0	0	0	0	3796.55		577	75.774	3932	3932	2520	1412	1993744		599854	599854	791547	-191693	36746206249		599854
	34.678	0	203	0	0	0	0	0	1893.61		578	75.834	2520						791547						791547
	34.738	610	203	0	0	0	0	0	1893.61		579	75.894	4336	4336	5042	-706	498436		653006	653006	601748	51258.1	2.62739e+09		653006
	34.798	203	407	0	0	0	0	0	1893.61		580	75.954	5042						601748						601748
	34.858	203	0	203	0	0	0	0	1893.61		581	76.014	4033	4033	4336	-303	91809		768787	768787	620731	148056	21920579136		768787
	34.918	407	610	0	0	0	0	0	3796.55		582	76.074	4336						620731						620731
	34.978	610	0	0	0	0	0	0	3796.55		583	76.134	2218	2218	2319	-101	10201		639686	639686	664386	-24700.9	6.10133e+08		639686
	35.038	203	0	0	0	0	0	0	3796.55		584	76.194	2319						664386						664386
	35.098	407	407	0	0	0	0	0	3796.55		585	76.254	4134	4134	4235	-101	10201		645413	645413	575172	70240.8	4.93377e+09		645413
	35.158	0	203	0	0	0	0	0	3796.55		586	76.314	4235						575172						575172
	35.218	0	407	0	0	0	0	0	1893.61		587	76.374	2218	2218	4739	-2521	6355441		607448	607448	723228	-115781	1.34052e+10		607448
	35.278	0	203	0	0	0	0	0	3796.55		588	76.434	4739						723228						723228
	35.338	0	0	0	0	0	0	0	1893.61		589	76.494	6655	6655	4033	2622	6874884		618828	618828	586562	32266	1041094756		618828
	35.398	203	203	0	0	0	0	0	3796.55		590	76.554	4033						586562						586562
	35.458	407	0	0	0	0	0	0	1893.61		591	76.614	2722	2722	4336	-1614	2604996		725131	725131	653006	72125.1	5.20202e+09		725131
	35.518	0	0	0	0	0	0	0	1893.61		592	76.674	4336						653006						653006
	35.578	407	0	0	0	0	0	0	3796.55		593	76.734	3025	3025	3226	-201	40401		597952	597952	605545	-7593.06	5.76546e+07		597952
	35.638	203	203	0	0	0	0	0	3796.55		594	76.794	3226						605545						605545
	35.698	203	0	0	0	0	0	0	1893.61		595	76.854	4941	4941	5445	-504	254016		641607	641607	586562	55045.3	3.02999e+09		641607
	35.758	407	203	203	0	0	0	126	1893.61		596	76.914	5445						586562						586562
	35.818	203	407	0	0	0	0	0	1893.61		597	76.974	4235	4235	4336	-101	10201		601748	601748	709945	-108197	1.17066e+10		601748
	35.878	0	0	0	0	0	0	0	1893.61		598	77.034	4336						709945						709945
	35.938	203	0	0	0	0	0	0	3796.55		599	77.094	2823	2823	4033	-1210	1464100		613119	613119	601748	11371	129299641		613119
	35.998	203	0	0	201	0	0	0	1893.61		600	77.154	4033						601748						601748
	36.058	203	407	0	0	0	0	0	3796.55		601	77.214	3731	3731	2924	807	651249		683378	683378	683378	0	0		683378
	36.118	0	0	0	0	0	0	0	1893.61		602	77.274	2924						683378						683378
	36.178	0	0	0	0	0	0	0	0		603	77.334	3932	3932	3226	706	498436		637820	637820	668192	-30372.4	9.22481e+08		637820
	36.238	1221	0	203	0	0	0	0	1893.61		604	77.394	3226						668192						668192
	36.298	0	203	0	0	0	0	0	1893.61		605	77.454	3428	3428	3630	-202	40804		694759	694759	670058	24700.9	6.10133e+08		694759
	36.358	610	0	0	201	0	0	0	0		606	77.514	3630						670058						670058
	36.418	0	0	407	0	0	0	0	3796.55		607	77.574	2621	2621	5445	-2824	7974976		700430	700430	708042	-7611.75	5.79387e+07		700430
	36.478	0	0	0	0	0	0	0	1893.61		608	77.634	5445						708042						708042
	36.538	203	0	0	0	0	0	0	1893.61		609	77.694	3529	3529	2621	908	824464		632111	632111	573279	58832.5	3.46126e+09		632111
	36.598	407	203	0	0	0	0	0	3796.55		610	77.754	2621						573279						573279
	36.658	203	0	0	0	0	0	0	1893.61		611	77.814	4336	4336	3831	505	255025		706158	706158	696662	9496.06	9.01752e+07		706158
	36.718	610	203	0	0	0	0	0	5690.16		612	77.874	3831						696662						696662	8.28202e+07
	36.778	1424	0	6513	201	524	2620	0	20876.3		s(Imean)		38.4435			36.4338	36.4946		3720.03			2184.73	2190.93		s(Imean)	2350.6
	36.838	1017	203	2442	0	0	1048	379	68337.8
	36.898	407	0	6309	100	0	0	759	115790
	36.958	0	407	8752	403	0	1572	1012	41762
	37.018	0	0	6309	201	0	0	126	47452.2
	37.078	0	0	12214	705	524	2096	632	70231.5
	37.138	407	0	10178	806	0	3669	126	64541.3
	37.198	203	203	7938	907	0	3669	1771	167048
	37.258	0	0	14047	2016	524	3144	1392	172738
	37.318	0	0	20363	1310	0	4717	1898	187924
	37.378	203	0	19955	907	0	4717	1012	206907
	37.438	407	203	21789	806	0	4193	1771	187924
	37.498	407	407	19548	806	524	5241	1771	193624
	37.558	0	407	20363	1814	0	4193	2404	178438
	37.618	407	203	20974	1915	0	2620	1138	299927
	37.678	407	0	31166	1310	0	8387	3164	277148
	37.738	814	0	25458	1411	0	4193	1138	354972
	37.798	610	407	30350	1512	0	4717	1771	389141
	37.858	407	0	38508	1915	0	10485	1645	373955
	37.918	407	0	38712	3226	0	9961	2278	417620
	37.978	814	407	32186	1008	524	7863	3290	362566
	38.038	1017	0	35653	2117	524	8387	2657	408124
	38.098	203	0	38100	1209	0	10485	3796	423310
	38.158	610	0	35245	3327	0	12583	1392	396734
	38.218	0	203	35041	2823	1048	6290	3543	410027
	38.278	407	0	45038	2420	0	10485	4429	459382
	38.338	814	0	53816	3025	524	8387	4176	523923
	38.398	0	0	49324	2117	0	6814	5189	546703
	38.458	814	0	49324	2924	1572	14681	4429	529614
	38.518	610	0	46058	3125	1048	9961	4936	537207
	38.578	407	0	48712	2924	0	14157	4683	552393
	38.638	610	0	50958	4739	524	11010	6835	571376
	38.698	814	0	54020	2621	524	12059	4176	539110
	38.758	0	203	51570	3428	0	11010	3417	575172
	38.818	0	0	51978	2722	0	9961	4176	554296
	38.878	1017	203	58105	3529	0	9436	5189	616925
	38.938	610	610	56675	4840	524	9436	4809	597952
	38.998	203	0	60760	3630	0	9436	4936	639686
	39.058	407	0	55858	4134	1572	21503	7721	630208
	39.118	610	0	53816	4840	1048	8387	4809	677670
	39.178	0	407	61986	2823	0	13632	3923	687147
	39.238	610	203	54224	3932	0	10485	4809	643491
	39.298	407	0	54429	1814	0	8387	6961	622634
	39.358	203	203	56879	2924	0	9436	4176	647297
	39.418	407	0	56062	2722	0	13108	5569	626402
	39.478	407	203	52591	2319	524	8387	3290	658696
	39.538	203	610	54837	5042	0	7863	5189	694759
	39.598	407	0	56062	3831	0	9961	5189	736530
	39.658	0	0	57288	4638	0	9436	5569	711848
	39.718	0	203	64029	6050	1048	11534	5062	814345
	39.778	0	814	56879	3630	0	9961	6202	734608
	39.838	203	407	55858	3731	1048	14157	5569	702352
	39.898	0	0	66276	3428	0	17829	5062	719441
	39.958	407	0	67094	3226	1572	27277	3923	709945
	40.018	407	0	73022	3428	0	14157	5948	768787
	40.078	0	0	62395	4134	0	8912	4683	687147
	40.138	610	0	65256	4638	0	15206	6075	747892
	40.198	814	0	56267	3125	0	16255	6075	744123
	40.258	203	0	61986	5748	1048	18879	5948	728937
	40.318	203	0	57084	4235	0	20978	4809	683378
	40.378	610	203	64029	2722	1048	9961	5316	679573
	40.438	407	407	69752	4235	0	24127	4429	746008
	40.498	0	0	68116	4941	0	13108	5062	812442
	40.558	0	610	68320	5748	1572	15206	4556	764981
	40.618	407	203	59739	3327	1048	11010	4429	711848
	40.678	0	0	71182	3731	0	14157	5569	789682
	40.738	407	203	65460	4134	0	16255	6455	795353
	40.798	0	0	62191	2823	524	12583	4936	810558
	40.858	407	610	66686	4033	0	14157	6835	839009
	40.918	0	0	69956	4134	1048	13108	6581	854214
	40.978	610	610	65256	2621	1048	18879	5948	799159
	41.038	203	0	61373	4033	0	18879	6328	770690
	41.098	0	0	58922	4840	1048	13108	4683	795353
signal begins	41.158	203	0	66276	5748	0	11534	4683	744123
1	41.218	610	203	69342	4739	0	15731	6075	802965
2	41.278	0	203	63825	5445	1048	17829	5442	787779
3	41.338	1221	814	79158	5243	524	15731	5062	763097
4	41.398	0	407	73432	3932	2620	12583	5822	757406
5	41.458	203	203	67298	2924	0	14157	4050	878896
6	41.518	610	0	84066	4134	0	11534	6075	882664
7	41.578	407	0	71796	4235	524	16255	6708	840930
8	41.638	610	0	72204	5143	0	15731	3670	825726
9	41.698	814	0	76090	3630	0	22552	5062	844718
10	41.758	0	0	76702	4537	524	12583	6075	761175
11	41.818	610	0	67094	6151	0	7863	7468	814345
12	41.878	407	203	67298	4033	524	17305	4936	772593
13	41.938	0	203	77930	4033	524	20978	7721	829532
14	41.998	203	0	75884	3932	0	16780	6328	799159
15	42.058	814	610	63212	4235	524	12583	6581	825726
16	42.118	610	1017	81202	4336	0	17305	4176	852292
17	42.178	203	0	72204	5143	0	24652	5062	789682
18	42.238	407	0	76498	4941	0	17829	5316	808636
19	42.298	0	610	75884	2924	524	12059	8101	839009
20	42.358	814	0	78134	3831	0	14681	7468	852292
21	42.418	0	0	74862	4437	0	12583	7721	799159
22	42.478	0	203	73022	3529	1572	15731	4809	932048
23	42.538	203	407	72818	4033	0	15206	8227	894082
24	42.598	1221	407	71592	6151	524	12059	4050	1.01367e+06
25	42.658	203	203	87136	4739	524	22028	7848	932048
26	42.718	0	0	79566	4336	0	20453	5822	930126
27	42.778	203	203	74454	6252	1048	15206	8101	871303
28	42.838	610	407	84476	5748	1048	16255	6581	888392
29	42.898	610	203	79976	5445	0	12059	4556	962420
30	42.958	0	0	74250	4638	1048	17829	4809	966207
31	43.018	0	0	75272	4638	0	18879	7848	821920
32	43.078	203	0	70774	4941	1572	17829	5442	820054
33	43.138	0	0	83044	5143	524	15206	7215	983296
34	43.198	0	0	82634	4235	1048	20978	8101	975703
35	43.258	0	0	78544	5042	0	11534	7848	909268
36	43.318	0	203	72818	5042	1048	14157	7088	968110
37	43.378	0	610	83452	5143	524	17829	7974	996580
38	43.438	407	203	77726	4739	524	17305	5442	930126
39	43.498	610	0	72818	3428	0	19404	7594	778264
40	43.558	407	0	85908	5647	524	23077	7088	858020
41	43.618	203	0	78134	3731	524	11534	8227	960498
42	43.678	0	0	80180	4537	0	19404	6455	818151
43	43.738	610	0	74454	5344	0	17829	6455	939641
44	43.798	0	0	81202	4437	0	24127	7594	913037
45	43.858	0	0	76702	5546	524	11010	3417	888392
46	43.918	610	814	81408	6353	524	16255	5695	962420
47	43.978	203	0	96552	4235	524	13632	6708	926357
48	44.037	407	0	81612	3630	524	16255	5822	964304
49	44.097	0	0	97986	4739	0	10485	5695	837125
50	44.157	814	0	88364	4739	0	18354	6328	875090
51	44.217	407	610	72614	5243	1572	21503	8354	922552
52	44.277	610	0	85498	7462	524	25177	7215	875090
53	44.337	0	203	76702	5042	2096	19928	6835	994677
54	44.397	203	0	95528	5042	1048	18879	6328	916843
55	44.457	0	610	80384	5445	524	14681	6581	827647
56	44.517	1017	610	85704	3428	0	13632	5569	952924
57	44.577	407	0	77726	7160	1572	17305	5316	895985
58	44.637	407	814	84066	5243	524	19928	5442	888392
59	44.697	1017	203	80794	4033	0	11010	6961	766902
60	44.757	610	0	82840	7261	0	23077	6581	911171
61	44.817	610	0	74454	4437	0	22552	6708	958614
62	44.877	0	0	98804	5748	524	16255	7848	970013
63	44.937	203	203	87954	4437	524	16255	6455	1045944
64	44.997	0	0	77316	5949	0	15206	6075	977588
65	45.057	814	0	74862	5647	0	13632	7088	1.01367e+06
66	45.117	203	0	99828	7362	0	18354	6708	842815
67	45.177	203	0	75066	4537	524	8387	5569	833337
68	45.237	0	610	75272	3731	0	18354	6075	911171
69	45.297	0	0	93890	6353	0	24652	7341	856098
70	45.357	610	0	70774	4336	0	20453	6708	954827
71	45.417	0	407	78338	5243	0	14157	5316	873187
72	45.477	0	0	78748	3630	0	18354	8987	854214
73	45.537	203	0	71592	4739	1048	15206	8481	935835
74	45.597	407	203	67298	4537	0	20453	6455	905462
75	45.657	203	0	86522	4336	524	25702	6708	990871
76	45.717	610	203	76294	5143	0	15731	7215	970013
77	45.777	203	0	101468	4235	1572	9961	6455	831434
78	45.837	407	203	82840	6050	524	21503	7594	899754
79	45.897	0	610	78544	4739	1048	10485	6581	810558
80	45.957	0	0	88364	5344	0	14157	5822	888392
81	46.017	203	0	73226	4336	0	15206	7215	867497
82	46.077	0	0	79362	5748	524	24127	5189	888392
83	46.137	610	203	79770	4537	0	14681	6581	899754
84	46.197	610	0	79976	6151	0	20978	7341	835240
85	46.257	0	0	86522	4537	0	23077	4556	882664
86	46.317	203	0	82430	4537	524	17305	4303	861807
87	46.377	1017	0	86726	5143	1572	13632	7215	876993
88	46.437	0	0	78952	4437	1048	20453	5695	890276
89	46.497	0	0	77520	5143	0	13108	7974	909268
90	46.557	0	0	81816	4638	0	20453	6581	913037
91	46.617	0	407	56879	3529	0	11010	3796	876993
92	46.677	0	0	81202	4638	2096	19928	5695	886470
93	46.737	610	0	75476	3831	524	22028	6581	920649
94	46.797	203	0	73636	4336	1048	19404	6708	922552
95	46.857	407	203	81612	5344	0	17305	7594	954827
96	46.917	610	203	83044	5042	1048	18879	6961	863710
97	46.977	203	0	75066	4638	1572	17829	6835	827647
98	47.037	203	0	81408	6050	0	19404	4556	909268
99	47.097	203	0	70570	3831	0	20978	8101	816248
100	47.157	407	0	78134	4941	524	17829	7974	852292
101	47.217	610	0	82430	4336	1572	15731	9240	918764
102	47.277	203	203	101262	3630	524	13632	6202	833337
103	47.337	1017	0	83452	4537	524	19404	8101	814345
104	47.397	203	203	82840	5042	0	20453	7215	880799
105	47.457	203	0	80180	5849	0	15206	5822	928242
106	47.517	0	610	73636	5546	524	14681	6961	846621
107	47.577	0	0	86318	5748	0	27802	6075	890276
108	47.637	0	0	80180	5546	524	17305	6075	975703
109	47.697	203	203	93890	4941	0	15731	7341	789682
110	47.757	203	0	77520	4033	0	19404	8734	825726
111	47.817	0	610	77112	5445	524	18354	7088	926357
112	47.877	407	203	86726	4033	0	19928	8987	911171
113	47.937	0	0	87340	4840	0	22552	5569	846621
114	47.997	407	0	79976	4235	0	14157	7974	858020
115	48.057	0	0	81202	5344	1048	22028	7594	829532
116	48.117	407	0	83248	4134	524	13632	8607	825726
117	48.177	0	407	80180	3327	524	16255	6455	839009
118	48.237	610	203	79362	5546	2096	14157	7088	905462
119	48.297	0	0	86318	3731	0	17829	8227	772593
120	48.357	407	0	68934	4134	0	14681	6708	795353
121	48.417	610	203	72818	5647	524	18354	6455	895985
122	48.477	0	0	92662	4134	524	15731	6835	903560
123	48.537	0	0	77930	3630	524	11010	5695	725131
124	48.597	0	203	77316	4537	0	18879	6328	835240
125	48.657	814	203	75680	3932	0	9436	6708	884586
126	48.717	0	203	65868	3025	0	14681	5822	694759
127	48.777	0	407	74250	4134	0	18354	6455	812442
128	48.837	203	0	86932	4537	0	14681	6708	882664
129	48.897	203	203	79566	4437	0	10485	7341	766902
130	48.957	0	203	69548	3932	1048	17305	4556	780186
131	49.017	0	0	82840	5143	0	16780	4809	852292
132	49.077	203	407	73226	5143	0	16780	7594	850426
133	49.137	0	0	80998	5949	0	13632	5189	734608
134	49.197	0	0	66890	4638	1048	13108	8354	907365
135	49.257	610	203	90206	4134	1572	21503	7468	886470
136	49.317	203	0	81816	5243	0	13108	4809	804868
137	49.377	203	0	57492	4437	1048	16255	6202	884586
138	49.437	0	203	84680	5647	0	17305	6581	888392
139	49.497	1017	407	78134	3831	0	14157	6708	776380
140	49.557	203	0	77930	3731	524	13108	7848	793469
141	49.617	0	0	80180	4235	1048	12583	4429	865613
142	49.677	814	203	83452	6050	0	24127	7088	880799
143	49.737	0	203	78952	3226	524	12583	7341	802965
144	49.797	203	0	70978	4235	0	18354	9114	892179
145	49.857	610	407	77930	7160	0	13632	6075	865613
146	49.917	814	0	75066	4638	0	19404	6328	795353
147	49.977	610	203	80384	4336	0	17305	5948	865613
148	50.037	203	203	80794	4134	1572	17305	4936	878896
149	50.097	203	0	77726	5042	524	14681	5822	774496
150	50.157	203	203	75680	4235	524	18879	5569	772593
151	50.217	0	407	76498	4537	1572	25702	8354	835240
152	50.277	610	203	80384	6353	0	14157	5948	810558
153	50.337	0	0	74044	3630	0	9961	5695	728937
154	50.397	610	203	61782	3932	0	19404	4303	861807
155	50.457	407	203	84272	4134	524	13632	4556	854214
156	50.517	203	203	73432	6050	2620	19404	4936	808636
157	50.577	0	0	68526	5949	0	14681	4936	827647
158	50.637	0	0	75476	5243	0	15731	6455	899754
159	50.697	407	0	80588	6454	1048	11010	5316	802965
160	50.757	407	1017	78952	3731	0	15731	5189	696662
161	50.817	0	0	69138	5748	524	16780	6328	852292
162	50.877	407	203	87546	3932	1048	20978	7594	776380
163	50.937	1017	0	71796	3831	524	18354	4303	827647
164	50.997	203	203	77112	5143	0	22552	5822	903560
165	51.057	203	0	86522	5445	0	17829	8987	890276
166	51.117	610	0	79158	3731	2096	9961	5948	801062
167	51.177	0	203	75884	5647	0	13632	4176	863710
168	51.237	0	0	79158	6454	1048	22552	5822	899754
169	51.297	0	0	84272	6756	524	15206	5695	818151
170	51.357	0	0	76090	3932	1048	17829	5316	719441
171	51.417	203	610	72614	3932	524	18354	9114	840930
172	51.477	407	203	78338	5042	1048	22552	5695	827647
173	51.537	0	0	72408	3428	0	9961	6961	753601
174	51.597	0	0	73226	4638	0	13632	4050	806752
175	51.657	203	0	71386	4437	1572	12583	5442	793469
176	51.717	407	203	77726	5344	0	10485	8987	721325
177	51.777	203	0	61986	5042	0	14157	4556	766902
178	51.837	407	0	77112	4235	0	15731	4936	846621
179	51.897	0	407	75476	3731	524	19928	5569	776380
180	51.957	203	407	68526	5344	2096	24652	5822	709945
181	52.017	203	203	81408	3932	1572	23602	6202	865613
182	52.077	203	0	90002	4840	524	19404	7088	854214
183	52.137	0	0	77520	4638	0	18354	5316	755504
184	52.197	1221	0	72204	4537	524	15731	5948	812442
185	52.257	407	0	79566	4336	0	13632	5442	888392
186	52.317	0	0	76090	4235	524	16780	5948	757406
187	52.377	610	0	60965	3025	1048	13632	8354	812442
188	52.437	203	610	87750	4739	1048	16255	6328	985199
189	52.497	0	0	87340	5042	524	18879	5569	746008
190	52.557	610	0	70774	4840	524	11010	5948	721325
191	52.617	407	0	75272	4638	524	15206	4556	850426
192	52.677	0	0	80588	6050	524	20453	4809	780186
193	52.737	0	0	76498	3831	0	17305	5062	808636
194	52.797	1017	0	75066	3125	0	18879	5822	761175
195	52.857	203	0	77726	5445	0	15206	6961	820054
196	52.917	0	407	62191	3831	524	19928	5442	787779
197	52.977	407	0	72818	4941	0	17305	4683	818151
198	53.037	0	0	75272	4437	2620	13108	5442	842815
199	53.097	1017	0	74250	4033	2096	16780	5569	768787
200	53.157	203	0	72204	3831	0	10485	4936	683378
201	53.217	203	0	69548	4638	1048	14157	6328	922552
202	53.277	407	0	86112	6454	0	18354	6202	761175
203	53.337	0	610	68730	3731	524	11010	4809	696662
204	53.397	610	203	68730	4235	0	14157	3670	734608
205	53.457	203	407	92252	3731	0	13632	6961	837125
206	53.517	203	0	70160	4941	1048	17829	6075	715635
207	53.577	407	0	58513	3428	1048	15206	5569	780186
208	53.637	0	1017	87546	4336	1048	17829	5189	844718
209	53.697	203	0	77520	5042	524	17305	6202	783973
210	53.757	0	203	65868	2520	0	13632	5822	689069
211	53.817	0	0	79566	5243	0	11010	5948	859904
212	53.877	0	0	83044	6555	0	14681	6581	783973
213	53.937	610	0	66890	5546	0	11010	5569	766902
214	53.997	610	610	80588	3125	0	14681	6581	859904
215	54.056	407	0	88160	6958	0	14157	4683	846621
216	54.116	610	0	76090	3731	0	15206	6835	782070
217	54.176	0	203	74250	4537	1572	17829	5062	755504
218	54.236	0	203	72408	4437	1048	15731	8354	884586
219	54.296	203	407	81612	4941	524	15206	5189	802965
220	54.356	610	0	59126	3731	0	13632	6455	774496
221	54.416	0	407	79770	5042	1048	17829	4556	816248
222	54.476	203	407	89796	3226	1572	20453	4556	852292
223	54.536	610	407	71182	3529	1048	13632	4809	799159
224	54.596	407	0	68116	3327	524	14681	6075	852292
225	54.656	0	0	76294	6151	0	24652	5822	854214
226	54.716	610	0	87750	5243	2096	16780	7848	801062
227	54.776	407	0	77726	4134	1048	15731	7468	865613
228	54.836	203	203	95118	6756	0	14157	7341	932048
229	54.896	0	0	75272	6353	0	10485	6581	810558
230	54.956	0	407	73636	4638	524	17829	5189	727034
231	55.016	610	0	73226	4739	0	13632	8101	810558
232	55.076	407	203	77726	4336	0	22028	6961	776380
233	55.136	203	203	64643	4235	1048	14681	5695	761175
234	55.196	203	0	71386	5344	524	21503	5948	787779
235	55.256	0	0	84476	3932	0	25177	7088	850426
236	55.316	203	0	74044	5143	524	16255	5442	660580
237	55.376	0	0	63008	2722	0	15206	5189	713751
238	55.436	203	203	73432	3226	0	16255	6328	747892
239	55.496	814	0	69342	3125	1572	16780	4809	708042
240	55.556	407	0	70160	5143	0	20453	4050	656775
241	55.616	0	203	65256	4941	0	14157	7341	801062
242	55.676	1017	0	84066	5243	0	17829	7088	833337
243	55.736	0	407	73226	5243	0	16255	5822	728937
244	55.796	203	203	62395	3529	524	8912	5189	753601
245	55.856	0	0	72818	5344	1048	18879	6202	835240
246	55.916	0	0	82226	5647	0	26227	6581	842815
247	55.976	1017	203	83862	4033	524	15731	5189	846621
248	56.036	407	0	74250	5243	0	12583	6455	894082
249	56.096	407	0	87954	4941	1048	20453	5948	831434
250	56.156	203	0	70160	3932	0	18879	6835	734608
251	56.216	610	0	76702	4638	2096	17305	6835	821920
252	56.276	203	0	79158	4739	0	23077	4429	787779
253	56.336	0	0	64234	2722	524	17305	5442	778264
254	56.396	203	203	64234	3932	0	17829	6835	732724
255	56.456	0	0	81202	4437	0	13632	5948	818151
256	56.516	0	203	76294	2924	524	15731	7341	820054
257	56.576	203	0	67912	4033	0	12059	6455	744123
258	56.636	814	0	76498	5243	0	18879	6202	894082
259	56.696	203	407	80384	5445	1048	9436	6835	827647
260	56.756	0	203	72614	4235	0	11534	7848	791547
261	56.816	0	203	74250	3327	1048	12583	7215	859904
262	56.876	814	0	76702	6958	0	19928	8227	880799
263	56.936	407	0	78544	5243	524	15206	7088	774496
264	56.996	407	0	68320	5344	0	14157	5569	751698
265	57.056	610	0	79362	3831	0	13632	6961	863710
266	57.116	814	203	78748	5949	1048	16780	4176	759309
267	57.176	0	0	64234	3831	0	10485	6455	810558
268	57.236	203	203	73432	7261	2096	19928	7088	814345
269	57.296	0	0	82020	4437	0	9436	3164	736530
270	57.356	203	0	78748	5243	0	26752	7088	753601
271	57.416	203	203	65664	4134	524	11010	4936	802965
272	57.476	203	610	76090	5042	524	11010	5822	808636
273	57.536	0	203	78748	5143	0	17305	4936	772593
274	57.596	814	0	69138	4638	1048	10485	6075	708042
275	57.656	407	407	80794	5949	0	15206	6328	901675
276	57.716	203	0	85294	4033	2096	13632	6581	787779
277	57.776	0	407	79566	4537	0	13632	5316	749813
278	57.836	407	0	68116	4638	0	16780	6581	882664
279	57.896	0	203	83452	4739	0	19928	5189	839009
280	57.956	203	203	71182	5849	0	19404	5442	725131
281	58.016	203	0	83044	4638	0	10485	6708	778264
282	58.076	0	610	85090	5042	0	18354	7848	882664
283	58.136	0	0	67298	3529	1048	11010	5189	749813
284	58.196	0	610	71386	4437	524	14681	3417	835240
285	58.256	814	0	84886	5748	1048	19404	4429	863710
286	58.316	407	0	72614	3932	0	16255	7848	774496
287	58.376	407	407	76294	4235	0	16255	3670	687147
288	58.436	203	407	61578	2722	0	13108	4429	776380
289	58.496	0	407	67504	5143	0	11534	5189	736530
290	58.556	610	0	78134	4840	1048	15206	5569	696662
291	58.616	203	203	65051	6353	1048	19928	7468	806752
292	58.676	203	0	83862	4537	2096	16255	5316	865613
293	58.736	0	0	78952	3529	0	13632	6708	660580
294	58.796	203	0	69956	3428	0	17305	5948	746008
295	58.856	0	407	70160	5243	524	17829	7848	755504
296	58.916	814	407	73432	5143	0	14157	6581	774496
297	58.976	407	0	64029	3932	524	24652	6455	785876
298	59.036	0	0	58513	5143	0	21503	5189	821920
299	59.096	203	203	74454	5949	524	16780	5316	706158
300	59.156	407	203	76294	4134	0	7863	4556	753601
301	59.216	407	0	69342	5849	0	14157	4936	782070
302	59.276	407	0	82840	4739	0	15731	8481	759309
303	59.336	0	610	70978	4336	0	16780	4050	725131
304	59.396	407	407	64029	4840	1572	15206	4683	706158
305	59.456	610	610	77520	4336	524	12583	4683	787779
306	59.516	407	203	83862	4134	524	22028	5822	740317
307	59.576	203	407	67094	3831	0	15206	4936	730803
308	59.636	203	407	83862	5748	524	8912	6075	909268
309	59.696	407	0	78338	5445	0	18354	6581	785876
310	59.756	0	1017	77930	3731	1048	13108	5822	694759
311	59.816	610	0	73636	4739	2096	11010	5569	840930
312	59.876	0	407	83862	4638	0	16255	5695	837125
313	59.936	610	203	87136	6454	524	17829	4809	812442
314	59.996	203	0	71386	4033	0	17305	8481	812442
315	60.056	203	0	79566	3630	0	13108	7088	837125
316	60.116	1628	0	82840	4941	0	12583	5316	728937
317	60.176	407	203	67504	5042	0	12059	6581	742220
318	60.236	0	610	64438	4537	524	11534	7848	793469
319	60.296	0	0	86522	3025	524	14157	6708	776380
320	60.356	0	203	59126	3428	524	11010	4683	651103
321	60.416	407	0	50549	5042	524	11534	7594	835240
322	60.476	1017	203	84476	3428	0	17829	7468	766902
323	60.536	610	0	80180	3932	524	14157	5316	675785
324	60.596	610	0	65664	3529	524	8912	3670	666289
325	60.656	610	0	71592	5445	0	18879	6961	821920
326	60.716	0	203	77726	3932	0	15731	6708	715635
327	60.776	814	0	64234	3630	2096	16255	4176	664386
328	60.836	0	203	66276	4235	0	15731	5569	791547
329	60.896	407	203	74250	3529	0	19404	6328	734608
330	60.956	203	610	81408	4638	524	10485	6455	759309
331	61.016	0	0	73432	4437	524	15206	4683	821920
332	61.076	407	407	79566	5344	0	16780	5316	907365
333	61.136	0	0	80794	5445	524	7339	6961	715635
334	61.196	1221	203	77726	6050	0	9436	4809	742220
335	61.256	0	0	85908	5445	524	17305	5948	814345
336	61.316	203	0	80588	4840	0	11534	5822	774496
337	61.376	0	0	75884	2520	0	13632	4683	690953
338	61.436	203	0	61578	4134	524	24127	6581	770690
339	61.496	610	203	82226	4638	524	10485	6075	749813
340	61.556	407	407	61578	3226	1048	17829	4809	677670
341	61.616	0	0	62599	5344	0	15731	5948	768787
342	61.676	610	0	82430	4537	524	16780	5316	793469
343	61.736	203	0	69548	3226	0	15731	4303	776380
344	61.796	203	203	74454	2722	0	18879	5189	761175
345	61.856	814	0	83862	3630	0	11010	10127	865613
346	61.916	203	203	86522	4840	0	20453	6581	734608
347	61.976	203	0	64438	4739	2096	8387	5695	692856
348	62.036	1017	0	68730	2621	0	13108	6075	816248
349	62.096	203	0	76702	4537	1572	9436	4050	791547
350	62.156	0	407	75272	2823	0	14157	5062	660580
351	62.216	814	0	60760	4033	0	18879	4429	772593
352	62.276	0	407	66276	6050	2096	18879	5822	751698
353	62.336	814	610	68116	3932	1572	16780	5442	713751
354	62.396	0	407	67298	4638	1048	15731	4683	685263
355	62.456	0	0	69138	3428	0	8912	5062	679573
356	62.516	610	0	72204	3630	0	15206	4429	694759
357	62.576	203	0	53203	4336	524	11010	5442	662483
358	62.636	407	0	68526	3932	0	9436	5189	789682
359	62.696	610	203	75272	5143	0	16780	5569	685263
360	62.756	407	203	56471	4336	524	13632	4303	635917
361	62.816	814	0	59943	3731	1048	14681	3923	797275
362	62.876	203	0	75680	3831	1048	15206	8734	795353
363	62.936	610	0	73022	5546	0	16780	4936	732724
364	62.996	610	0	66482	3731	0	13108	5442	702352
365	63.056	407	0	75066	5143	524	16255	8227	757406
366	63.116	407	0	73226	4941	1048	18354	6835	711848
367	63.176	407	0	67504	4537	524	12059	3796	649200
368	63.236	203	0	70774	4638	0	19928	3923	808636
369	63.296	407	0	80794	4134	524	12059	5442	772593
370	63.356	203	0	76702	4437	0	13108	6581	671980
371	63.416	0	610	64643	3630	524	11010	5189	723228
372	63.476	203	203	82840	3529	2096	18354	5822	755504
373	63.536	0	0	69342	3932	0	18354	4809	725131
374	63.596	0	203	78338	3731	0	13632	5316	742220
375	63.656	203	0	70978	4840	0	13108	5822	802965
376	63.716	0	0	81612	5143	524	17305	7088	764981
377	63.776	203	0	72408	3932	0	13632	4556	694759
378	63.836	814	0	64847	4840	1048	17305	5062	793469
379	63.896	0	0	82430	3731	0	13108	4176	795353
380	63.956	407	203	64847	3932	0	13632	5062	721325
381	64.016	0	0	64438	4033	0	19928	5569	821920
382	64.076	0	0	73636	4437	1048	24127	6835	789682
383	64.136	407	0	76294	3529	524	14681	7468	776380
384	64.196	0	0	70160	3125	0	11010	5569	654890
385	64.255	0	0	60760	5143	1048	20978	5948	742220
386	64.315	203	0	68320	4941	0	9436	5822	711848
387	64.375	0	0	66890	2722	0	19928	5189	666289
388	64.435	0	0	62599	3025	0	14157	3037	776380
389	64.495	0	0	66276	4537	0	15731	3670	696662
390	64.555	203	0	73432	3731	524	13108	6835	709945
391	64.615	203	407	67094	4840	0	12059	5189	708042
392	64.675	610	0	76498	5243	1048	17829	6328	795353
393	64.735	0	203	79362	6353	0	24127	5822	753601
394	64.795	407	610	71386	3428	0	16780	4429	759309
395	64.855	203	203	68730	5344	0	18879	5569	763097
396	64.915	407	203	76090	3529	0	14157	4809	685263
397	64.975	0	0	74658	2520	0	17305	3670	662483
398	65.035	0	0	57901	4033	1048	15206	5316	746008
399	65.095	0	203	64438	4336	0	10485	5062	778264
400	65.155	0	0	76498	3327	0	17829	4556	689069
401	65.215	0	0	79158	3327	1048	16255	4936	770690
402	65.275	407	610	73840	2924	0	18354	7341	806752
403	65.335	814	0	78134	5647	1572	22028	4809	730803
404	65.395	0	203	64847	3529	524	16780	3923	677670
405	65.455	0	0	72408	4638	0	15206	7341	816248
406	65.515	203	0	80180	4437	524	17829	5822	725131
407	65.575	203	203	68526	5042	0	14157	4809	753601
408	65.635	407	0	70160	4638	524	8912	4556	783973
409	65.695	407	407	90410	4336	524	13108	3670	793469
410	65.755	0	0	63621	4134	2096	15206	6708	666289
411	65.815	0	0	66686	3226	524	8912	6202	723228
412	65.875	203	610	75272	3428	0	13632	4683	764981
413	65.935	0	407	70160	5243	524	16780	7341	761175
414	65.995	610	0	62395	3932	0	13632	5822	681476
415	66.055	0	0	82020	4336	0	19404	6202	825726
416	66.115	0	0	78748	4336	0	13108	3923	776380
417	66.175	0	407	73432	5949	0	13108	5822	702352
418	66.235	203	0	74454	4941	1048	18354	5316	778264
419	66.295	0	0	75680	3731	0	11010	5189	723228
420	66.355	0	203	70978	4638	1048	15731	4303	713751
421	66.415	407	407	60148	3932	0	16255	4809	757406
422	66.475	407	0	81202	4840	524	12059	6328	751698
423	66.535	203	0	79976	2823	0	15731	4809	709945
424	66.595	814	203	62599	4033	524	19404	4429	681476
425	66.655	203	0	69956	3529	524	12583	5316	753601
426	66.715	407	0	64643	3831	0	12059	6835	730803
427	66.775	203	203	64234	4437	0	9961	4176	651103
428	66.835	407	203	61986	4638	1572	12583	5316	719441
429	66.895	203	0	67298	5344	0	14157	4556	715635
430	66.955	407	0	69548	4235	0	17829	5442	709945
431	67.015	610	0	64438	4638	1048	11010	6581	801062
432	67.075	0	0	77520	4537	0	16780	6835	747892
433	67.135	0	203	59535	3125	2096	11010	5316	728937
434	67.195	0	203	64029	3731	0	15206	4936	662483
435	67.255	203	203	86318	5546	1048	16255	6075	744123
436	67.315	0	610	75476	3831	0	15731	4936	639686
437	67.375	0	610	65256	3831	0	18879	4809	647297
438	67.435	610	0	53816	3831	524	12583	7721	789682
439	67.495	0	203	74862	4437	524	17829	3923	698565
440	67.555	0	0	61986	3932	1048	12059	4936	575172
441	67.615	407	0	57288	4235	0	14681	5189	749813
442	67.675	203	0	71386	5143	524	13632	4809	816248
443	67.735	610	0	63212	2420	0	17305	4683	709945
444	67.795	203	407	61169	3932	0	11534	5948	681476
445	67.855	0	0	72000	5949	0	23077	8481	772593
446	67.915	0	0	73636	4437	524	11010	6075	679573
447	67.975	0	203	67298	3529	0	12583	2910	715635
448	68.035	0	203	77520	4134	524	15206	5442	787779
449	68.095	203	203	83248	4739	0	10485	4556	751698
450	68.155	610	0	66482	4739	524	16780	5062	721325
451	68.215	610	203	63416	4336	1048	15206	5695	740317
452	68.275	203	203	74658	6353	0	19404	5062	747892
453	68.335	407	203	65460	4739	1048	20453	5062	689069
454	68.395	203	0	70160	3428	0	9961	6455	654890
455	68.455	407	0	69548	5344	1048	13632	5948	761175
456	68.515	203	203	75272	2218	0	15206	4429	694759
457	68.575	407	0	65664	5243	0	11534	5569	715635
458	68.635	203	407	72408	3226	524	17305	5442	725131
459	68.695	203	0	82226	3226	524	20453	5316	706158
460	68.755	814	0	73840	4336	0	17829	5695	664386
461	68.815	407	203	69752	3529	524	19404	4556	814345
462	68.875	203	0	62804	3428	0	17829	4936	780186
463	68.935	407	0	68730	3125	0	14681	4556	679573
464	68.995	0	0	63825	3731	524	14681	4303	715635
465	69.055	1628	203	63008	4134	0	11534	4683	696662
466	69.115	407	0	67708	4537	524	11010	7848	742220
467	69.175	407	203	59126	3226	0	11534	4556	647297
468	69.235	407	610	77112	4941	0	17305	6202	772593
469	69.295	407	0	74250	3529	0	12583	4936	709945
470	69.355	203	203	58513	2823	524	13108	5189	654890
471	69.415	407	0	74454	4235	0	13108	6328	804868
472	69.475	203	0	69956	3932	0	17829	6455	816248
473	69.535	1017	0	66482	3025	0	12583	3670	670058
474	69.595	610	0	60148	3226	524	17829	6835	757406
475	69.655	203	0	79566	2520	0	21503	6202	829532
476	69.715	0	203	76498	4033	1048	12583	3923	634014
477	69.775	203	203	66686	4437	524	18879	4303	681476
478	69.835	0	203	65664	3731	0	14157	5948	759309
479	69.895	610	203	77316	5042	524	12059	6455	736530
480	69.955	203	0	64234	4033	1048	17829	3417	628324
481	70.015	203	0	59943	3630	524	8387	4050	719441
482	70.075	0	0	79770	4638	0	16255	4936	662483
483	70.135	0	0	53408	3831	1572	10485	4936	601748
484	70.195	0	0	61169	3125	1048	12583	4176	656775
485	70.255	203	0	74658	3831	0	15206	4556	715635
486	70.315	610	0	73432	5143	524	15206	5062	675785
487	70.375	0	203	62804	4336	0	9436	4176	704236
488	70.435	203	0	68526	4134	524	22028	7215	799159
489	70.495	0	0	78544	3932	1048	8912	5062	711848
490	70.555	0	0	66890	3529	0	8912	4683	685263
491	70.615	407	203	78952	4437	0	12059	5948	751698
492	70.675	610	610	78544	3731	0	18879	8861	696662
493	70.735	0	0	60965	4638	0	16255	4556	687147
494	70.795	0	203	63416	3226	524	10485	5948	685263
495	70.855	610	203	69138	5445	1572	13632	4303	742220
496	70.915	203	203	72614	4638	0	12583	6328	613119
497	70.975	0	0	74454	3428	0	11534	3670	647297
498	71.035	203	0	64847	3831	0	13108	5316	723228
499	71.095	1424	0	63008	3831	524	14681	4683	653006
500	71.155	203	0	59126	4134	0	13632	5695	634014
501	71.215	407	203	65664	4537	0	13632	5442	801062
502	71.275	0	407	80384	4941	1048	14681	4429	696662
503	71.335	0	0	61373	4537	1048	13632	5569	670058
504	71.395	814	203	74250	3529	1048	11534	4050	679573
505	71.455	203	203	75680	3932	0	15731	5569	715635
506	71.515	1017	203	70570	3831	0	12059	5948	605545
507	71.575	0	203	60556	4033	0	20453	6708	702352
508	71.635	407	203	60760	2319	524	14681	5822	747892
509	71.695	407	203	72204	4739	0	10485	5948	690953
510	71.755	610	0	59943	4033	524	7339	5569	637820
511	71.815	407	0	59739	3731	0	17829	6328	772593
512	71.875	1017	0	88774	4033	1048	9436	7088	721325
513	71.935	407	407	68116	4739	0	14681	6075	751698
514	71.995	0	0	64234	4033	0	10485	7594	793469
515	72.055	0	0	78748	4941	0	11534	6455	818151
516	72.115	0	203	75884	5445	524	12583	6708	624518
517	72.175	407	0	70774	3731	0	13108	6455	660580
518	72.235	203	203	67298	4739	524	19928	5695	782070
519	72.295	610	203	79158	5143	524	16780	4303	692856
520	72.355	203	203	55654	2420	0	8387	5062	605545
521	72.415	610	814	57696	3731	524	25177	6961	764981
522	72.475	203	0	74454	5546	0	17829	4429	711848
523	72.535	203	0	60760	3428	0	8387	5189	626402
524	72.595	203	203	61782	5647	524	18354	6328	744123
525	72.655	203	203	70570	4638	524	8912	5062	848524
526	72.715	0	203	75680	4638	0	17305	3417	622634
527	72.775	814	407	65460	3327	0	9961	6328	683378
528	72.835	610	203	65460	5546	0	11534	6202	727034
529	72.895	407	0	69342	5042	0	10485	4936	698565
530	72.955	407	203	57492	4235	0	14157	3543	628324
531	73.015	407	203	60965	3428	1572	11534	7088	753601
532	73.075	203	0	69548	5344	524	12583	5442	651103
533	73.135	0	203	69138	2722	2096	12583	3670	651103
534	73.195	0	0	76498	4840	524	6290	5569	689069
535	73.255	610	610	76908	5647	524	19404	5189	761175
536	73.315	407	0	76908	2924	1048	12583	4429	689069
537	73.375	407	203	53612	3125	1048	11534	5189	681476
538	73.435	203	203	74454	4638	524	15206	6708	683378
539	73.495	0	0	64438	3025	524	12059	4303	592261
540	73.555	0	203	61578	3630	0	7863	5316	653006
541	73.615	407	0	65256	3025	524	9961	4556	677670
542	73.675	0	203	70570	4638	524	15206	4809	666289
543	73.735	203	0	61782	3327	524	15206	4303	565686
544	73.795	203	203	63825	3327	0	11534	6455	626402
545	73.855	0	0	74454	4537	2096	26752	6328	766902
546	73.915	610	0	64438	3630	0	15731	4809	668192
547	73.975	1017	0	55654	5546	524	9961	6708	654890
548	74.035	203	0	78134	5445	524	13632	5442	757406
549	74.095	0	203	67094	4437	1572	13108	4809	702352
550	74.155	203	407	75476	3630	1048	7863	3923	662483
551	74.215	610	0	59943	4537	0	11010	6075	728937
552	74.275	407	0	76908	4638	1048	15206	6708	630208
553	74.334	0	407	66482	2319	0	13632	5442	639686
554	74.395	203	203	61986	3630	1048	14157	4809	634014
555	74.454	0	0	67094	5243	3144	17829	4176	624518
556	74.514	610	814	58513	4537	0	9436	4303	670058
557	74.574	203	0	59330	4235	0	14681	3670	677670
558	74.634	203	407	67504	4537	0	16255	7088	831434
559	74.694	203	0	92048	4739	1048	16255	4556	715635
560	74.754	407	0	55858	5042	524	17829	5442	651103
561	74.814	610	0	68730	4134	1048	14681	4809	730803
562	74.874	0	0	71592	3932	524	17305	5316	685263
563	74.934	610	0	61578	3327	524	10485	3796	654890
564	74.994	407	0	60148	4537	1048	15731	3543	662483
565	75.054	407	0	75272	5042	0	13632	4809	732724
566	75.114	203	203	63825	2722	0	9436	4809	626402
567	75.174	203	407	65460	2621	524	13632	4303	662483
568	75.234	0	0	60760	3226	0	15206	5948	732724
569	75.294	407	0	71796	4537	524	13632	4936	673864
570	75.354	0	407	58922	3125	1048	13632	3417	548596
571	75.414	203	203	63621	5647	524	10485	5695	668192
572	75.474	407	203	65256	3125	1048	20978	4556	634014
573	75.534	407	0	56675	3428	0	12583	5569	611244
574	75.594	814	0	63008	4941	0	11534	5569	666289
575	75.654	0	407	61373	3125	0	9961	4683	742220
576	75.714	0	0	70978	4739	0	7863	4809	635917
577	75.774	0	0	70978	3932	0	6290	4176	599854
578	75.834	0	407	68730	2520	524	14681	4556	791547
579	75.894	610	1221	69752	4336	1572	13108	6202	653006
580	75.954	0	0	62599	5042	0	13108	3670	601748
581	76.014	407	0	66482	4033	0	9961	5062	768787
582	76.074	0	203	77726	4336	524	14157	6581	620731
583	76.134	407	203	62191	2218	524	15206	5442	639686
584	76.194	814	814	74658	2319	0	15731	5316	664386
585	76.254	0	0	64234	4134	524	13108	4303	645413
586	76.314	814	0	55654	4235	1048	13108	3417	575172
587	76.374	203	203	50753	2218	524	8912	5062	607448
588	76.434	203	203	64234	4739	0	16255	7468	723228
589	76.494	203	0	73840	6655	0	12583	4303	618828
590	76.554	203	0	54429	4033	1048	12583	3417	586562
591	76.614	0	0	58922	2722	1572	11534	4303	725131
592	76.674	407	203	68116	4336	0	14157	4809	653006
593	76.734	203	0	61169	3025	0	10485	5189	597952
594	76.794	814	0	45038	3226	2620	12583	3670	605545
595	76.854	1221	0	63212	4941	0	14157	4936	641607
596	76.914	203	0	65664	5445	0	15731	3670	586562
597	76.974	0	203	56471	4235	1048	9961	3923	601748
598	77.034	203	0	70978	4336	0	12583	6961	709945
599	77.094	203	203	59126	2823	0	11534	4050	613119
600	77.154	814	407	67912	4033	0	14157	4303	601748
601	77.214	610	0	68116	3731	0	14681	5062	683378
602	77.274	0	203	67708	2924	1048	15206	5062	683378
603	77.334	0	0	61373	3932	1572	13632	3164	637820
604	77.394	610	610	67298	3226	524	7339	3290	668192
605	77.454	0	0	67912	3428	524	14681	4809	694759
606	77.514	0	814	79158	3630	524	16780	6328	670058
607	77.574	203	203	68526	2621	0	13632	2657	700430
608	77.634	407	0	65256	5445	1572	10485	5442	708042
609	77.694	407	203	67094	3529	0	12583	4556	632111
610	77.754	203	610	63416	2621	0	7863	5062	573279
611	77.814	0	203	49733	4336	524	9961	4936	706158
612	77.874	610	407	73840	3831	0	14157	4936	696662
signal ends

## Sheet: transient signal, replicates
	A REPLICATE SERIES OF 18 TRANSIENT SIGNALS
	The original data were acquired using an Element XR sector-field ICPMS interfaced to an UP-193FX laser ablation system.
	The SRM610 doped glass standard from NIST was ablated in the spot mode at a repetition rate of 10 Hz, 35 mkm beam size and 5 J/cm2 on-sample energy density.
sweep n	1	2	3	4	5	6	7	8	9	10	11	12	13	14	15	16	17	18	19	20	21	22	23	24	25	26	27	28	29	30	31	32	33	34	35	36	37	38	39	40	41	42	43	44	45	46	47	48	49
	Replicae acquired using an Element XR ICPMS interfaced to an UP-193FX excimer ablation system. The NIST SRM 612 doped glass standard was ablated in the spot mode at a 35 mm pit size, 10 Hz repetition rate, 5J/cm2 on-sample energy density. Dwell times 5-10 ms, 150 sweeps.
replica 1
201	203	814	203	0	0	1017	610	203	203	203	0	203	203	0	610	0	407	407	610	203	203	407	203	203	407	610	203	814	203	0	814	203	203	203	407	0	203	0	203	610	0	0	0	610	407	0	0	407	203
204	30801	31414	31414	31823	31005	39804	33460	29574	28143	34687	28552	39394	40008	31414	37756	37142	29165	37552	38780	39599	28348	34073	33664	33255	39804	39599	36528	35915	33255	32641	31210	36324	32028	38371	31005	33255	31005	34687	31823	37347	36938	35505	32641	35710	34278	36528	32846	42466	33664
206	510304	539072	608048	555968	489696	644352	572928	518920	465072	503064	544976	542224	668224	625968	580656	584384	665296	640448	605008	584384	577616	573616	600576	575952	655920	673552	587568	637664	541264	664032	495696	657040	482888	517416	513584	582176	482888	606528	534816	650768	572784	596976	550608	596560	619712	599040	544016	565744	504704
207	499544	471984	503024	583024	508464	526784	503240	482384	480112	490416	487376	521432	515768	646608	520344	495960	547552	587312	505960	509336	590176	511408	538688	497040	624320	605728	547888	555216	525472	666528	453816	624528	481736	448632	542512	608384	462680	577952	515328	595904	547664	515112	576192	592496	562128	554560	538800	539344	478920
208	1152640	1033760	1052704	1276096	1369632	1286848	1088960	1234496	1258432	1291936	1080960	1352384	1220704	1354944	1322400	1044160	1256544	1489760	1267904	1437216	1463136	1325600	1243296	1297632	1433984	1148288	1305888	1190656	1382464	1335136	1314144	1509984	1166944	1116096	1593408	1248992	1246464	1379264	1155744	1592096	1355584	1214432	1180032	1451456	1175040	1265376	1228864	1270432	1203168
232	1981588	1840581	2129278	2262433	2159481	2018475	2254547	2347419	2395588	2445880	2027458	2162841	2027458	2406764	2093417	1949121	2420204	2518664	2460380	2250126	2534225	2459248	2412281	2349683	2492917	2151665	2325068	2041958	2469434	2116935	2143779	2351946	2339568	2119164	2821826	2223247	2295996	2501830	2313856	2464907	2310532	2383281	2384271	2189649	2278101	2410018	2016212	2100172	1983780
235	5950	5063	5823	6077	5190	5190	4304	5190	5823	5063	4937	7724	4810	6963	5317	4557	6710	6457	5697	5823	5443	6077	5697	6077	5823	5190	5317	6077	6203	3670	6077	6710	5697	6710	7977	6457	6203	6710	5823	5443	4937	5063	4937	4430	4177	7597	3797	6203	6077
238	2260170	2106856	2159481	2130339	2159481	2354139	2146042	2266854	2099075	2235555	2279162	2463775	1894268	2365315	2339568	2006203	2697690	2481741	2687575	2240011	2488390	2213203	2444819	2284785	2566763	2172921	2404501	2320611	2426853	2178509	2344095	2283689	2723366	2251222	2235555	2398913	2519725	2354139	2882232	2209843	2439160	2359656	2219887	2293733	2254547	2422396	2457126	2328392	2403369
replica 2
201	0	203	0	0	203	407	203	203	0	0	203	0	407	0	0	203	0	0	203	203	0	407	407	203	203	203	0	203	203	407	203	203	407	0	407	610	203	203	407	610	203	407	0	203	407	203	814	407	0
204	33255	42876	30188	27735	42466	36528	29779	29165	33664	34278	30188	24261	37552	35505	30188	38575	35710	31823	29370	33255	37552	27735	29574	35915	37961	37142	38985	34892	36938	37552	29165	31619	35096	42261	27122	36733	28552	35096	27326	36324	31619	36119	32028	37756	35505	28348	34278	31005	40827
206	495424	599600	605424	534128	603616	530288	549776	546896	509896	564096	526320	525216	625408	662912	584928	678736	557072	546064	513584	578992	616656	560928	551296	644896	666416	591296	579680	621664	551568	566304	544560	599040	576512	662496	589904	651184	551984	609296	619024	580240	539072	633056	607504	574160	588944	568640	627504	631952	608880
207	461488	434728	596464	542960	447232	495200	481624	503456	474584	547232	494216	510752	625312	531360	548544	560592	537488	605408	559712	513912	563344	538912	511736	525584	627968	553904	607056	553584	533776	610816	540880	599440	521216	635616	555120	577632	509992	530608	646272	527984	498128	536608	575872	503352	544160	530608	615680	627744	547552
208	1081568	956000	1413984	1288128	1020944	1202528	1135264	1269152	1255264	1209408	1192512	961440	1475456	1232608	1124128	1292576	1224448	1335136	1413984	1158880	1274208	1401728	1063136	1223200	1272320	1368352	1295104	1296992	1262208	1372224	1450144	1304608	1304608	1319872	1275488	1370272	1420416	1254656	1476096	1136512	1158240	1411392	1292576	1331328	1375424	1205024	1337696	1351104	1209408
232	2251222	1697347	2167262	2090057	1850661	2132603	2037502	2226607	2405633	2209843	2194141	1765640	2149402	2068802	2271381	2410018	2458117	2486127	2626037	2092320	2053170	2347419	2083373	2185228	2248994	2502961	2366446	2318348	2405633	2303777	2564499	2177377	2274741	2368710	2405633	2152762	2275837	2163973	2587983	2310532	2068802	2171789	2026326	2241143	2235555	2355271	2335041	2413413	2280294
235	6457	4810	4050	4430	4304	2911	4430	4430	6583	4937	7977	3924	5063	5823	4684	4557	4684	5570	6583	5443	5190	6710	4684	6203	5317	6457	6203	5317	6203	5190	4177	4304	4557	4684	5063	5823	6077	5823	6330	7597	6077	3417	3797	6963	5063	5317	5317	8230	6837
238	2405633	1884188	1990535	2144910	2200896	2140419	2376561	2189649	2306040	2250126	2335041	2292601	2224379	2312725	2360788	2376561	2577938	2333909	2696558	2307172	2206448	2449275	2482732	2514137	2077785	2304909	2351946	2483863	2784903	2043090	2403369	2205316	2361920	2170657	2451468	2242239	2378754	2047582	2269118	2372034	2746920	2027458	2422396	2400045	2332919	2547735	2163973	2514137	2306040
replica 3
201	203	407	203	0	0	0	407	203	610	0	203	407	407	814	1017	0	203	407	0	0	203	203	0	203	0	0	610	203	407	407	0	0	0	203	203	203	407	0	203	203	203	203	407	0	0	610	0	814	407
204	41442	31210	35505	31005	31414	29165	30801	33460	37552	28143	31414	32846	30188	32232	35096	32437	34482	30801	36938	36733	35710	32028	29983	35915	36733	32846	36528	36938	38985	33050	38371	32232	32437	35915	26509	31619	33664	37552	31619	29983	36528	30801	34482	35505	36324	37756	32437	34073	41237
206	581888	517688	561888	484792	581344	516048	569616	576240	581760	537424	522344	605424	652720	623184	592960	585632	568512	628608	556800	583280	602784	578720	603760	653552	663616	588944	605840	572640	669904	630416	589088	669488	611248	626800	476352	539472	512496	684480	586320	529056	531520	593648	659696	645184	579552	548544	536320	651744	633760
207	515872	527104	524592	499872	553904	614576	564336	512608	622656	474152	462136	511624	603968	556432	498456	560592	621216	593264	481520	504872	546896	584672	541648	589408	533984	541968	571248	504440	564768	535296	555552	657728	617568	579824	533552	444320	459432	639056	581472	494000	525248	599984	594592	584784	509232	478160	512712	583344	562688
208	1111776	1129696	1438496	1191904	1378624	1445632	1466368	1243936	1225728	1150176	1031920	1032544	1381184	1235776	1122272	1493696	1337056	1455328	1101888	1417216	1267264	1324320	1358752	1432032	1154528	1406880	1315424	1430752	1386304	1199392	1459232	1481312	1307776	1322400	1202528	1156384	1109280	1356224	1387616	1124128	1216320	1321120	1307776	1447552	1361312	1262208	1300160	1336416	1360032
232	2238879	2246766	2327331	1897627	2458117	2530972	2520857	2156086	2201992	2205316	1999483	2144910	2229932	2218756	2254547	2538752	2259074	2524252	2647328	2440292	2386535	2292601	2455995	2784903	2198632	2565631	2240011	2516401	2391062	2125919	2856485	2615993	2285917	2799474	2235555	2024098	1951349	2189649	2345227	1775684	2190781	2342963	2358524	2261302	2577938	2197536	2401176	2267986	2228871
235	4810	5317	4304	6203	5443	5443	5190	4304	7344	5443	4430	5317	4810	7217	2911	5190	6077	3797	5063	5823	5317	4430	7470	6077	6583	7977	5317	5317	6710	3924	7344	6077	6077	6837	5950	5823	4810	4937	4430	3924	5190	5190	6457	5443	7217	8104	6077	6077	6077
238	2102400	2165034	1978228	2103532	2228871	2022967	2285917	2235555	2394457	2492917	2511874	2101304	2329524	2553323	2263494	2233327	2480610	2269118	2408886	2461512	2331787	2634949	2755761	2911374	2484995	2458117	2941577	2593571	2930331	2377622	2322804	2491785	2400045	2676399	2347419	2769272	1968113	2179570	2119164	2266854	2312725	2193009	2410018	2142647	2598097	2311664	2641740	2253486	2299356
replica 4
201	203	0	407	0	0	814	203	203	0	0	0	610	610	203	0	0	203	203	203	0	0	0	203	203	0	203	0	407	0	1017	407	610	0	407	0	0	203	0	1221	203	407	0	203	0	407	0	203	203	610
204	26100	33255	29983	35096	31823	30801	35915	33869	28757	36733	37347	31210	33460	36324	25078	34892	29574	33460	25283	29779	29370	29779	40008	31210	30801	33050	36528	34687	33664	37347	37347	36119	28961	32232	38575	33869	43285	34278	36324	32028	26713	29983	37756	46974	31414	29779	33460	32846	38166
206	488744	521800	535776	527136	527952	545520	536592	575264	512080	633904	618736	532208	550336	626528	562304	725696	503064	617072	553360	604592	561344	545520	687984	513448	592400	578720	552672	592672	583552	637936	563552	588256	619440	575536	620832	565888	605840	559008	699776	580240	563264	559824	611104	567408	527264	570432	714128	580512	630976
207	459216	472416	504328	537712	567408	480112	539680	514784	429024	531696	640496	476536	525680	517072	508360	542192	553024	484232	471440	552592	547888	545696	553584	556432	561152	563008	559712	567184	470360	546464	547888	640176	590944	536720	544048	617568	586208	521656	577632	539120	496064	516416	528304	538800	572128	505312	620432	554784	541312
208	1142720	1027648	1205664	1395328	1405600	1374784	1395968	1288128	1017888	1114848	1443040	1088960	1266016	1197536	1288768	1227584	1327488	1115456	1128448	1192512	1238272	1186912	1280544	1248352	1347264	1318592	1472224	1443680	1020336	1292576	1211904	1530912	1314144	1303328	1305248	1284320	1317952	1562432	1349184	1269792	1416544	1233888	1417856	1235136	1321760	1368992	1403680	1373504	1158880
232	2059889	2033011	2189649	2274741	2525313	2303777	2163973	2300453	2143779	2203124	2436897	2232195	2219887	2131471	2318348	2027458	2426853	1945726	2049845	2179570	2339568	2143779	2401176	2264626	2520857	2559972	2451468	2457126	2137094	2431379	2170657	2417940	2496242	2496242	2388798	2506357	2574614	2584587	2617125	2419072	2332919	2287049	2354139	2370903	2435765	2695426	2356402	2443687	2259074
235	6837	5190	6710	7344	5190	4684	5443	5063	5570	4937	5190	4810	5950	5570	6710	4430	6330	4557	6583	6963	5190	4430	6963	5190	4937	6330	7217	5063	5190	6963	5317	4810	4684	3797	5823	5443	6077	5443	6963	6330	6330	6203	5697	5697	5063	6710	7217	7090	7597
238	2538752	2247862	2133735	2543279	2059889	1914427	2228871	2489522	2143779	2141551	2244503	2772596	2341831	2708795	2627169	1941305	2338436	2379886	2457126	2464907	2645064	2361920	2624905	2467170	2168394	2513005	2326199	2516401	2388798	2834134	2165034	2207580	2596966	2226607	2369842	2484995	2657301	2421265	2439160	2292601	2687575	2312725	2368710	2724497	2261302	2357534	2214264	2284785	2552192
replica 5
201	0	0	0	203	0	203	203	0	203	814	407	0	610	203	0	0	0	203	0	0	0	0	203	0	610	203	0	0	0	0	203	203	407	407	203	0	203	203	0	0	610	203	203	814	203	610	0	610	0
204	33869	29983	35096	29165	31210	39804	28757	30801	27939	29165	33460	37142	30188	30801	39599	38780	32641	35915	32232	40008	31414	33255	35505	43285	35915	32028	28961	38166	41851	29779	29370	36324	31823	36528	42466	31823	35301	36324	37756	34892	37552	33050	33255	37961	26713	33869	33050	37142	32846
206	615824	518512	604448	502248	585072	622624	555424	629312	621520	578848	585760	556944	585904	512352	535776	593504	553904	680272	608608	718496	588256	596000	578720	619152	544144	577472	660672	625696	672432	588800	566848	650336	616384	615136	580928	487104	639888	728800	707936	705264	647408	610544	555568	628192	592400	592544	576784	602368	616656
207	481840	450144	548864	468304	480112	559280	506616	580160	540432	509008	596896	493128	482168	519472	449712	525472	508792	544272	548976	586864	560704	640608	521000	598448	467656	524056	574880	567408	589632	586208	621872	565536	606176	573440	603408	480864	576416	559712	540992	574208	600096	534208	456840	711248	588416	525024	511840	509232	605840
208	1012416	1053312	1231360	1109920	1040480	1252768	1124128	1502816	1345984	1291296	1425600	1242688	1121664	1257792	1183776	1188160	1138368	1203776	1408832	1166944	1432704	1322400	1266016	1319872	1320512	1155136	1316672	1261568	1390816	1376064	1524384	1412032	1384384	1413984	1673120	1243296	1055776	1250240	1427520	1403680	1385024	1332608	1036208	1569664	1425600	1324320	1271680	1165696	1328128
232	1804790	2021835	2325068	2154955	1975964	2170657	2095680	2562236	2273609	2254547	2357534	2463775	2129278	2177377	2104663	2246766	2308304	2355271	2387666	2257942	2554455	2443687	2245634	2350815	2379886	2333909	2210940	2661828	2452599	2348551	2541016	2450407	2420204	2576807	2551060	2304909	2470495	2063249	2405633	2356402	2447012	2452599	2103532	2605807	2452599	2531962	2679653	2081109	2515269
235	4937	3037	6077	4177	4937	4937	4937	4557	4937	6203	4937	7850	7344	5697	5190	7977	6583	6203	4810	6583	6203	6203	5950	4810	5697	5443	5950	7850	7090	6583	6203	5443	5697	5317	5570	5317	5317	4430	6077	5317	6077	4557	6330	8864	6330	4304	5190	5063	6963
238	2139358	2055433	2048713	2094548	2037502	2125919	2122559	2169526	1946858	2524252	2184097	2298224	2290373	2396650	2104663	2585719	2307172	2310532	2611466	2323936	2526445	2693163	2242239	2306040	2370903	2301584	2481741	2717778	2276969	2478346	2323936	2587983	2618186	2547735	2290373	2257942	2460380	2189649	2153894	2449275	2639476	2745788	2123690	2533094	2297093	2680784	2520857	2348551	2519725
replica 6
201	203	407	203	203	0	0	407	203	203	0	407	203	0	203	203	203	0	0	203	203	407	0	0	0	0	407	203	0	610	203	610	203	203	0	407	203	610	0	203	407	610	407	203	0	407	203	0	0	407
204	28348	26509	32846	29983	34892	27939	24670	32232	30801	31823	29574	27326	34482	36324	31210	27326	31005	30188	40008	36938	33664	35710	37142	36938	35710	33460	37552	34278	38985	32641	31210	43285	36528	39599	39599	33460	34687	38371	32641	37756	40008	40213	43285	40623	38780	34892	40418	31619	32846
206	532624	482616	565744	472680	559552	535776	516320	562864	547312	498288	556256	519056	624720	607216	559136	601120	533440	554736	577344	657744	570432	556112	619152	603200	592816	579968	627360	630560	628048	606384	486152	602240	650624	588800	618048	643792	649792	676768	580512	583552	622624	680832	634736	745760	621520	539616	613600	644624	718784
207	538688	449176	453272	518272	526672	517944	496064	502480	441728	503568	527872	500088	500848	551280	488792	599664	486288	500304	516960	532016	601424	567952	500416	574656	510752	528736	564000	551936	728208	546464	456624	601984	516088	540656	547232	585328	589184	618992	492152	540992	567952	567184	530608	539456	530816	534432	569264	575760	612144
208	1116704	1205664	1057632	1377344	1231360	1288128	1208800	1313504	1064960	1233248	1178784	1242048	1225088	1385664	1096352	1341536	1186272	1232000	1229472	1354944	1369632	1203776	1098816	1269152	1234496	1130304	1235136	1245184	1484576	1452096	1218816	1397248	1065600	1345344	1195008	1442400	1330048	1576256	1143968	1339616	1247712	1328128	1433984	1357504	1230112	1263488	1353024	1228224	1319872
232	2014019	2196404	1952481	2292601	2201992	2366446	2332919	2223247	1946858	2246766	2323936	2271381	2121427	2257942	2366446	2269118	2170657	2225511	2322804	2190781	2737937	2468302	2139358	2527576	2345227	2188588	2301584	2613729	2586851	2681916	2338436	2707663	2088996	2559972	2170657	2812914	2168394	2791623	2436897	2231063	2338436	2509610	2480610	2219887	2162841	2406764	2457126	2232195	2260170
235	5063	5950	3797	6203	4304	4810	4937	3670	5570	4684	4430	7344	4684	5823	5063	6203	4810	6457	5697	2531	5190	7090	7597	6077	6583	5950	5317	5190	4430	6963	5823	6583	4810	6077	5697	7090	3924	6710	5443	3797	6330	7344	4810	6203	5950	5317	7217	6077	7217
238	2303777	2392193	2061021	2218756	2205316	2297093	2394457	2185228	2158350	2255678	2113611	2617125	2643932	2470495	2297093	2208712	2502961	2307172	2241143	2448143	2416808	2849766	2552192	2273609	2551060	2322804	2243371	2525313	2204185	2574614	2224379	2328392	2476083	2527576	2319480	2424660	2379886	2404501	2543279	2555587	2109119	2537621	2318348	2527576	2348551	2799474	2463775	2590246	2112479
replica 7
201	203	203	0	203	203	407	407	203	203	203	0	610	0	0	407	0	610	203	203	610	407	0	203	0	407	203	203	0	203	407	610	0	203	203	407	610	203	407	407	0	0	203	0	203	610	0	203	1017	407
204	33869	36324	26509	32232	31005	29983	34482	32641	37347	35710	31414	30188	31619	24670	35505	32028	32641	37756	32437	38371	33460	37347	35915	34482	37142	43080	36733	39599	40623	39599	31210	42056	35505	36733	40008	27530	31005	36324	36733	31005	34892	31210	32232	33664	38985	36119	40418	28552	28552
206	552672	644624	556656	650896	529328	517688	520424	658448	560512	587968	526032	587008	562448	573888	690224	647968	558176	721312	634320	642112	549648	640160	630560	732048	530976	656064	740656	676624	642400	523712	683632	659984	611376	671024	682928	516184	618736	643648	608048	535360	603056	637664	626944	614160	546352	614720	658448	559696	491880
207	465704	535296	609936	536176	591280	519144	504768	505312	552368	538144	539232	558512	562576	517072	593600	516312	578832	547664	568944	554896	478480	569056	608384	615792	527216	517944	554240	614128	617664	517616	544928	546352	539456	570480	567072	537264	536944	565648	555008	506288	495632	600208	566960	554352	537600	587424	611696	626080	501176
208	1147072	1174432	1340256	1152032	1394656	1319872	1083392	1252128	1178784	1381824	1245184	1093248	1409472	1271680	1314784	1317312	1346624	1068672	1322400	1350464	1222592	1397248	1522400	1398528	1333856	1279264	1526976	1350464	1390176	1143328	1176288	1172544	1340256	1362592	1493696	1285600	1370944	1363232	1326848	1246464	1142080	1488480	1261568	1360672	1170688	1502816	1467008	1489760	1185024
232	2123690	2262433	2187456	2139358	2247862	2254547	2059889	2353007	2147174	2466039	2299356	2278101	2559972	2605807	2360788	2264626	2484995	2069933	2453731	2500698	2227739	2369842	2744656	2259074	2489522	2381018	2475022	2478346	2764815	2412281	2367578	2421265	2266854	2242239	2788299	2355271	2222151	2492917	2361920	2031879	2355271	2293733	2489522	2349683	2041958	2696558	2386535	2314988	2135998
235	4050	7724	4810	4177	6963	4177	5063	5443	3670	5697	7090	6330	5443	7470	5317	5697	4684	5570	4937	4810	5570	5697	6457	4937	5950	5697	5823	7597	6710	7597	6457	8230	5950	5823	7344	7344	5190	6077	6457	5063	8230	5570	4937	6077	4177	6077	5823	5697	6583
238	2335041	2033011	2504093	2288110	2438028	2073329	2341831	2432511	2273609	2386535	2642801	2279162	2213203	2562236	2387666	2333909	2442555	2283689	2586851	2671943	2336173	2505225	2609202	2048713	2579070	2265758	2387666	2570087	2454863	2683048	2579070	2769272	2416808	2552192	2037502	2852029	2898996	2541016	2475022	2538752	2314988	2716646	2589114	2556577	2368710	2348551	2195272	2104663	2238879
replica 8
201	610	407	0	1017	610	0	203	0	0	0	610	203	407	0	407	407	0	203	0	0	0	610	0	0	0	0	203	814	814	407	407	203	203	0	407	407	203	0	203	1017	610	0	0	407	0	1017	203	203	0
204	28348	32028	31210	29779	35710	42466	27326	30596	35915	39189	33460	38985	36733	46154	36938	38780	35096	31823	36528	27735	30392	30392	39804	35710	35301	34278	41647	34687	42876	39599	34892	40827	36119	37347	34482	40418	38985	30801	25078	35915	36324	31414	36938	32028	37756	33869	36119	39189	33460
206	585632	514272	552256	564656	499784	593232	622352	609440	641280	558448	518920	646304	547168	680688	581760	579136	643376	506616	631392	640304	537424	601408	777376	752688	589504	588256	685600	616656	635296	685184	697104	624720	654672	573472	537552	733456	630976	619712	579824	632224	638080	637376	612640	612080	591712	633760	676768	774832	654384
207	488568	458784	549520	558080	492480	594592	502264	608272	621648	549408	515328	573888	563456	556752	595024	531696	624528	600976	676016	595136	535296	603296	636288	676896	481840	521760	589520	561696	503896	602752	610928	608608	599888	584896	531696	597344	546240	678016	561152	545248	560592	545360	577184	659840	461272	569936	627408	571584	573232
208	1027040	1193760	1422368	1239552	1470272	1412032	1114848	1229472	1486528	1382464	1213184	1300800	1367072	1353024	1424288	1245824	1489120	1349184	1347264	1515232	1409472	1322400	1349824	1538784	1243296	1324960	1385024	1269152	1271680	1342144	1337056	1506080	1427520	1456000	1418496	1516512	1213184	1459872	1255904	1349824	1336416	1307168	1291936	1452096	1080320	1473504	1429472	1267264	1346624
232	2439160	2151665	2423528	2261302	2392193	2398913	2186325	2219887	2481741	2466039	2361920	2753639	2506357	2492917	2519725	2151665	2773728	2243371	2338436	3044423	2407896	2455995	2325068	2676399	2529840	2349683	2441424	2491785	2593571	2288110	2292601	2882232	2251222	2558840	2487259	2543279	2212072	2389930	2571219	2647328	2559972	2368710	2297093	2517532	2323936	2573482	2369842	2382149	2370903
235	7724	6203	6330	7090	6583	5063	4177	4557	5317	6837	8104	6963	8104	6330	6203	5570	7217	5697	8737	8737	7090	7217	5317	6077	6583	4937	5443	4177	6837	5697	6583	4430	5570	5823	5823	6837	5570	5697	6077	6203	9118	4937	7977	7090	5697	6710	6710	6837	7217
238	2704268	2476083	2536489	2517532	2593571	2381018	2285917	2160613	2347419	2494049	2254547	2292601	2521989	2442555	1980456	2430248	2420204	2104663	2331787	2466039	2566763	2627169	2404501	2583456	2802870	2407896	2431379	2300453	2400045	2365315	2423528	2657301	2558840	2643932	2590246	2541016	2196404	2602554	3069109	2441424	2451468	2424660	2788299	2248994	2293733	2444819	2427984	2279162	2259074
replica 9
201	203	0	610	203	0	407	407	203	203	0	0	407	0	203	0	0	0	407	610	0	0	0	407	0	203	203	407	407	0	203	203	203	203	610	203	0	0	0	407	203	203	407	407	203	203	407	610	203	0
204	41647	38166	33050	40213	34687	38166	32232	38575	30188	28757	34278	37961	34892	40213	28757	29165	36119	43900	38780	36528	39599	42466	37142	39394	31619	42261	40008	36938	37961	34687	31210	38575	37142	34482	44720	35301	37756	48819	37961	35505	37961	42261	38780	41647	39189	48409	36938	40213	35301
206	606384	659008	607360	650064	703712	576368	547040	569616	640032	585344	573328	593504	573200	598624	687840	687984	623328	606112	607776	732320	600704	695424	731200	583696	611792	700480	681248	586864	614576	702880	699776	688272	648672	657184	687280	667664	640304	696976	732320	553904	653840	794608	610960	632080	695568	662496	631248	560928	676912
207	604080	500960	539680	562784	595136	562016	545904	517184	569168	584992	525904	559824	467656	605728	676896	659616	633184	554016	567616	606832	564112	569056	577952	592928	609600	584448	571360	577184	653056	608384	587312	614464	583792	585776	617664	590176	633728	594368	586096	582912	549312	661408	533776	537808	603632	582464	637168	569712	546464
208	1440448	1378624	1262208	1412032	1345984	1320512	1325600	1156384	1690496	1384384	1276096	1274208	1185024	1597376	1474176	1433984	1563744	1243936	1200640	1410752	1423008	1406880	1402400	1416544	1370272	1404960	1160736	1450816	1503456	1250240	1493024	1340256	1317312	1379264	1439808	1471552	1559808	1380544	1214432	1634496	1174432	1439808	1272320	1335136	1565056	1257792	1438496	1406240	1219424
232	2348551	2400045	2339568	2333909	2263494	2632686	2499637	2146042	2694294	2426853	2708795	2476083	2464907	2394457	2684180	2552192	2524252	2422396	2179570	2312725	2783772	2630422	2598097	2906847	2633818	2617125	2262433	2743525	2424660	2397781	2640608	2660696	2411150	2271381	2140419	2608071	2961736	2470495	2253486	3101505	2289241	2570087	2229932	2314988	2685311	2092320	2391062	2443687	2332919
235	6077	6457	5950	3924	4557	6457	4937	4810	6203	4810	6203	4810	6710	6457	5823	6457	5190	7470	5823	7597	5190	3670	5443	7344	5697	6457	7597	7090	5950	6963	7217	6963	5063	5570	4430	6077	7850	5317	5570	7597	7470	6330	6330	4937	7597	4050	4937	4810	5570
238	2426853	2231063	2609202	2248994	2366446	2420204	2460380	2565631	2345227	2537621	2549999	2490654	2662960	2462643	2500698	2222151	2411150	2774859	2403369	2314988	2453731	2501830	2810650	2443687	2370903	2812914	2273609	2480610	2723366	2591378	2661828	2834134	2359656	2508479	2623844	2402237	2686443	2620449	2533094	2422396	2439160	2606939	2657301	2497373	2575675	2442555	2180701	2457126	2083373
replica 10
201	814	0	0	203	203	0	203	0	407	203	0	0	0	407	0	0	407	203	407	203	407	203	814	203	407	203	203	610	0	203	610	407	0	203	0	203	0	0	0	407	0	0	203	0	407	0	203	407	0
204	45129	35096	32437	34892	28552	26509	32437	34687	36528	37756	32641	36938	35505	39394	31823	34687	36528	36119	37552	38166	36733	33869	37142	41851	43695	32641	37347	35096	36528	25896	38780	36324	36938	44720	30392	36938	29779	41032	33050	32641	32641	38985	33460	36528	34073	31823	38780	38575	29983
206	623184	568224	560928	529184	516184	449888	606672	607360	645184	568640	534272	585904	609856	696976	561760	593792	555840	552944	678176	646432	646016	660816	763744	633200	609584	672000	625552	645456	593920	540992	764880	588672	646432	682800	550464	690656	589504	631664	635712	641136	580928	721184	651600	632512	726544	567408	617632	695712	489016
207	586320	537488	597120	464408	526336	440112	527872	486616	584448	511408	510864	601872	564432	573776	592608	580480	569056	546896	552256	549408	598672	555552	599664	588640	554016	573776	558400	526016	651392	580704	653840	572240	574000	646496	530048	627520	570256	554672	517512	573344	565424	606064	568384	623536	634176	591616	561808	581808	517072
208	1300160	1381824	1368992	1245824	1209408	1163840	1351744	1176288	1377984	1208800	1262208	1474176	1349184	1290016	1295104	1344704	1356224	1175680	1323040	1446272	1419136	1305888	1200640	1561760	1247104	1284960	1283072	1341536	1485216	1329408	1496928	1394016	1213792	1493024	1167584	1345984	1423008	1283712	1181920	1370272	1159488	1346624	1322400	1552576	1403680	1486528	1432032	1240800	1275488
232	2348551	2289241	2396650	2381018	2434633	1982649	2419072	2231063	2353007	2385403	2660696	2342963	2457126	2422396	2445880	2406764	2643932	2179570	2196404	2903452	2483863	2453731	2442555	2930331	2233327	2213203	2448143	2476083	2496242	2589114	2641740	2393325	2331787	2690970	2083373	2311664	2348551	2253486	2455995	2357534	2257942	2372034	2266854	2654047	2264626	2237818	2534225	2194141	2335041
235	4684	8104	6583	6457	5570	6203	7090	4684	6837	6330	4810	7470	6077	5950	6457	6583	4430	6203	6330	4684	6963	5317	6963	4557	5697	4557	6077	6203	4177	7090	6963	6077	5570	6077	4810	5823	5570	8737	5443	5950	4810	6710	4937	6077	6330	4050	5063	5317	7724
238	2208712	2391062	2452599	2253486	2463775	2502961	2904584	2404501	2299356	2386535	2641740	2282557	2290373	2494049	2629432	2406764	2356402	2475022	2599229	2322804	2557709	2731146	2397781	2448143	2372034	2556577	2667416	2739068	2702146	2674135	2497373	2618186	2552192	2379886	2609202	2488390	2345227	2225511	2391062	2234459	2373166	2462643	2262433	2549999	2406764	2845380	2516401	2066573	2443687
replica 11
201	0	0	0	407	0	407	407	203	0	0	407	0	203	0	0	203	407	407	0	407	0	407	610	203	610	203	203	0	0	0	407	203	203	203	203	0	0	203	407	0	203	610	203	0	0	203	203	610	0
204	41442	36733	40827	35096	28348	37347	39394	40213	31619	36324	34073	36119	29779	35505	40827	29983	39394	40623	33869	33460	36733	43080	36733	32437	35301	44310	40213	34073	35096	35505	43285	36119	28961	29370	37756	37961	33664	44105	34687	24057	41442	44924	33255	39189	38985	31005	36733	26713	36938
206	710048	541680	575136	615824	557760	578848	540432	632224	560928	530704	643088	654528	559696	595168	614304	518104	707232	624304	600160	565888	589216	626384	635712	556656	654816	700064	656624	621936	618192	641008	614160	612352	540720	556384	576512	765312	603472	732048	625824	572784	700480	631248	635296	592400	635152	581488	599040	564928	636544
207	605296	547664	486944	596352	547440	601424	511192	536608	550736	483576	597008	611584	534976	619328	632960	512280	552928	526336	546672	585216	563344	542624	649168	534208	567184	607728	627088	560928	548432	637056	520456	554896	623984	569936	569488	620000	566960	606400	567616	604624	538256	529296	509008	616336	533216	590624	599984	607824	572672
208	1456000	1292576	1150784	1183168	1191904	1373504	1153888	1210048	1344064	1098816	1103744	1286240	1304608	1312864	1560448	1399168	1379264	1204416	1295744	1465728	1340896	1343424	1487168	1286848	1303328	1237664	1454048	1301440	1498240	1300800	1252768	1365792	1373504	1396608	1261568	1319872	1578240	1393376	1284320	1450144	1221952	1282432	1168192	1406880	1333216	1347264	1393376	1322400	1452736
232	2355271	2384271	2057626	2288110	2357534	2394457	2395588	2436897	2735673	2365315	2357534	2289241	2504093	2422396	2697690	2559972	2581192	2223247	2134866	2538752	2357534	2646196	2537621	2313856	2579070	2270249	2354139	2551060	2481741	2344095	2109119	2271381	2544340	2349683	2417940	2394457	2415677	2174017	2356402	2544340	2157218	2255678	2066573	2475022	2346288	2452599	2538752	2658433	2640608
235	6457	5443	7090	5443	5443	4050	7217	7977	6330	6710	5063	4937	5570	6203	6203	5317	4810	5317	6963	5950	6203	7217	5190	3797	6330	6457	4684	6583	7217	5697	4684	5190	4810	6203	5317	5317	6077	6077	5697	5950	5063	7850	6710	5443	5443	4557	5317	6330	6203
238	2617125	2341831	2438028	2303777	2406764	2518664	2624905	2404501	2115804	2636081	2330656	2241143	2383281	2276969	2225511	2978429	2365315	2195272	2435765	2557709	2548867	2508479	2414545	2670811	2546604	2687575	2385403	2477215	2679653	2395588	2656169	2214264	2589114	2257942	2336173	2337304	2357534	2001711	2266854	2674135	2285917	2643932	2360788	2721173	2527576	2477215	2301584	2486127	2424660
replica 12
201	0	407	407	610	203	407	407	814	407	203	0	0	203	610	0	0	407	0	0	0	203	407	0	203	203	814	0	0	0	0	814	610	610	203	203	0	203	407	610	0	407	0	610	610	610	1017	203	407	203
204	27122	38575	29779	33050	28552	34073	32437	36119	30596	35505	38575	36938	33255	31005	30188	38780	43285	32028	34687	38166	35096	35710	32028	34482	39189	34278	38575	32846	38371	36119	35301	34278	36528	40213	36733	31823	31210	41647	39189	37961	32846	23649	39189	32028	47179	32437	29983	33664	32232
206	640576	612640	597792	625552	538384	559824	554048	609296	594608	621792	635568	557344	657040	595024	519336	575680	629856	550192	608880	594064	706960	603616	592544	651744	664736	629440	670320	565056	711168	632512	569200	707088	598208	647280	613184	635424	603344	700624	600432	660544	552528	574304	616384	561888	737136	611792	586048	617488	516320
207	579712	544272	564112	556752	577840	509448	522416	517184	519688	510752	553584	550288	537152	581696	478264	538688	530160	488896	564992	479136	608160	621872	583792	560592	573440	598560	610048	540224	614912	698480	537712	614912	625648	575312	532352	602752	579392	680256	617008	665968	498784	506504	603968	512496	631744	626752	570592	614912	547440
208	1310336	1176288	1252768	1459872	1254656	1152640	1064960	1039872	1203776	1232000	1334496	1504768	1193152	1358112	1192512	1289408	1401728	1255904	1500192	1208800	1263488	1430752	1530272	1419776	1281152	1195008	1558496	1221952	1360032	1566368	1195648	1461824	1594080	1418496	1255904	1465056	1496288	1457920	1301440	1487808	1289408	1152032	1615904	1305888	1382464	1207520	1377344	1309696	1406240
232	2447012	2114672	2204185	2379886	2265758	2147174	2175149	2231063	2196404	2274741	2543279	2181833	2193009	2256810	2279162	2288110	2557709	2264626	2742393	2639476	2429116	2670811	2667416	2533094	2631554	2393325	2613729	2287049	2404501	2659564	2147174	2430248	2568955	2476083	2300453	2524252	2393325	2438028	2109119	2703277	2385403	2172921	2935989	2473890	2420204	2313856	2605807	2381018	2543279
235	5823	7217	5063	4177	5950	4304	4937	5063	5443	6710	5570	4557	5443	5190	5190	5697	5570	6457	7090	6203	5570	6963	5190	7090	5697	4684	4810	4177	5190	6330	4810	4937	6330	6077	4684	6077	6077	5570	4557	9371	5570	5190	5697	5570	8230	6583	5190	5697	4557
238	2441424	2248994	2033011	2414545	2594702	2137094	2190781	2346288	2292601	2232195	2381018	2388798	2298224	2083373	2712190	2158350	2636081	2574614	2624905	2337304	2543279	2649520	2368710	2632686	2489522	2654047	2201992	2366446	2235555	2656169	2317216	2270249	2499637	2276969	2367578	2626037	2464907	2674135	2335041	2529840	2448143	2552192	2394457	2753639	2702146	2339568	2410018	2190781	2657301
replica 13
201	203	0	407	407	203	203	0	407	203	407	203	203	0	0	610	814	203	407	203	203	203	407	203	0	0	203	407	0	0	203	0	0	407	0	203	0	407	407	610	407	203	203	0	203	0	0	203	610	0
204	25691	33664	33460	30188	34073	36733	35710	28143	27735	31210	36528	32846	38371	36324	32437	38780	42261	34892	34687	32028	26304	37961	35915	27735	36938	38575	34073	39804	38575	30188	37961	32846	28552	31414	29983	34482	39189	32232	33869	31619	37347	33460	34892	42466	32437	40213	38575	43080	34687
206	521520	484928	570032	636688	585072	548272	615408	589632	507160	561472	568928	606256	556256	634320	566720	579136	611376	637664	645184	619440	571408	574992	607920	527824	691072	605696	651328	593648	625552	601120	659008	626944	551440	602096	633472	573056	595440	636128	646160	662640	738960	588944	575408	589632	625280	687008	571264	529056	582864
207	462352	486512	511296	538256	562128	456840	589520	554448	491720	528848	543936	513696	523072	547776	483800	525680	540000	599664	579488	562784	519256	516088	572128	465056	651280	548976	635280	532240	553360	657952	535408	560048	504544	542080	548208	517184	506616	556976	583344	559824	498568	532352	524592	494544	598000	538464	554784	477832	555120
208	977184	1116704	1195648	1186912	1508672	1127232	1166944	1279264	1178176	1125376	1300160	1077248	1171936	1213792	1213184	1345344	1385664	1179424	1365792	1201888	1203168	1302720	1427520	1163840	1383104	1161984	1399168	1178784	1419136	1454688	1237664	1629184	1248992	1284320	1214432	1250880	1229472	1222592	1405600	1185664	1164448	1239552	1329408	1117312	1422368	1048432	1528288	1151392	1309056
232	1994956	1979324	2262433	2184097	2742393	2003939	2182965	2337304	2346288	2223247	2511874	2102400	2213203	2290373	2217624	2429116	2242239	2412281	2510742	2339568	2443687	2376561	2840853	2603685	2383281	2168394	2388798	2153894	2633818	2631554	2138226	2953814	2381018	2331787	2243371	2735673	2100172	2283689	2579070	2259074	2141551	2857617	2423528	2102400	2652916	2113611	2910242	2545472	2735673
235	2658	4304	5317	5317	5190	7217	5443	6963	5063	6330	5190	6330	7090	5063	6963	5697	6457	5697	5950	6077	6963	5317	7217	6077	8230	5950	6330	5697	7470	6583	3417	6963	8230	5317	5570	4557	6963	4937	4937	4810	7597	5317	5443	7597	6583	5063	5063	5317	6457
238	2024098	2195272	2457126	2307172	2498505	2156086	2132603	2118032	1988272	2103532	2374298	2435765	2058758	2207580	2761420	2480610	2441424	2353007	2382149	2689838	2622713	2640608	2293733	2466039	2350815	2262433	2284785	2364183	2594702	2621581	2114672	2298224	2800606	2242239	2596966	2642801	2614861	2777123	2441424	2660696	2424660	2497373	2933726	2344095	2667416	2337304	2347419	2408886	2088996
replica 14
201	0	0	203	203	203	407	814	203	0	203	610	0	203	0	0	407	203	0	203	610	610	610	0	203	407	407	203	0	407	814	407	203	0	0	203	203	407	407	814	203	203	407	0	203	0	407	0	0	0
204	23649	30392	31414	27122	27122	36119	31619	31005	29779	30188	32846	32028	33050	30392	32232	34687	32028	38166	37756	34073	33050	35915	34278	33255	43080	36119	38166	35301	30801	39599	34073	37756	32641	32437	33664	39804	38371	34278	28961	40213	42261	34892	43695	34892	38985	43490	41032	35915	30801
206	487240	530144	566992	605424	591440	651040	533168	592960	559824	533440	648384	549376	642528	574032	553504	609024	487792	563264	540576	567264	687568	603888	590464	552528	668512	612912	662496	543184	562864	570848	631664	560656	641424	583968	570992	594336	591296	599456	522896	567136	566720	666544	629728	692192	620400	619152	541264	618608	586736
207	478376	508464	524480	591936	441408	559824	462136	539776	513256	529296	538144	543616	633072	544272	613904	532128	516960	518712	646496	579056	538800	515216	537600	540112	570704	548208	558624	550736	564112	516416	568496	494544	483144	606608	550288	552480	526784	588640	506072	553024	508360	624528	539888	618896	627632	550624	491936	613136	572240
208	1163840	1353664	1149536	1265376	1039872	1219424	1171936	1210048	1166336	1361952	1183776	1404960	1311584	1214432	1357504	1293824	1181280	1271040	1366432	1332608	1262208	1173184	1291296	1124736	1361952	1525024	1223840	1347904	1532896	1358112	1386976	1276736	1059456	1386976	1376064	1368352	1267264	1547968	1397888	1266624	1117952	1310976	1181920	1298272	1487168	1374784	1149536	1223200	1342144
232	2125919	2168394	2417940	2245634	2312725	2502961	2378754	2383281	2370903	2310532	2209843	2548867	2627169	2047582	2403369	2147174	2187456	2422396	2039766	2342963	2055433	2370903	2511874	2469434	2604817	2715585	2445880	2477215	2670811	2659564	2694294	2304909	2718910	2525313	2575675	2290373	2415677	2534225	2661828	2406764	2529840	2459248	2159481	2185228	2412281	2247862	2261302	2226607	2443687
235	5823	4430	4304	3417	5950	6330	7090	5063	3544	6837	6963	5697	7597	6077	7090	3797	6710	6583	5823	6457	5697	6330	6710	6710	7344	7597	5570	4810	6330	5317	6077	6457	7217	4937	6710	5697	3670	4557	5190	5190	5950	5823	4810	6583	8737	4557	5190	3924	4937
238	2313856	2168394	2077785	2379886	2263494	2157218	2501830	2157218	2224379	2142647	2307172	2262433	2372034	2101304	2680784	2170657	2410018	2370903	2366446	2205316	2621581	2441424	2754630	2440292	2335041	2321672	2392193	2154955	2516401	2435765	2828475	2814045	2420204	2478346	2602554	2554455	2797211	2160613	2641740	2282557	2580202	2477215	2615993	2480610	2684180	2066573	2317216	2382149	2438028
replica 15
201	0	203	407	0	203	610	0	610	0	203	610	203	203	0	0	203	407	407	203	407	0	0	203	610	407	0	407	0	610	0	203	203	0	203	203	203	407	0	407	407	610	0	0	203	0	0	1017	610	203
204	33050	33050	34687	38985	32846	32028	32846	31823	36733	35710	31619	35505	28552	40827	29983	33460	31823	37552	30596	33869	31619	35710	35710	32846	32846	38166	34687	36324	38575	34482	37347	42671	39189	41442	34482	32437	38985	31823	35505	28757	38371	37756	38780	35301	44515	45334	36119	35301	38985
206	481256	550608	557216	661648	621936	562576	553632	559552	540160	569616	622208	621376	553504	637520	607360	643376	560384	589904	524944	629584	560512	590736	570576	616240	558032	609440	604592	622080	695984	620128	614848	591568	585904	588800	682656	606384	607216	576096	628336	606528	639472	608048	605840	605008	730352	645328	657600	744336	558720
207	484992	482064	542960	481840	519256	580160	525472	489768	514672	542736	568384	560592	494328	586864	553024	563664	499216	511624	584784	527872	557408	505088	588736	525136	560160	571584	572352	611152	607824	490848	597232	517072	521432	572672	585440	584992	496824	498128	621216	573664	626752	514784	647952	551056	575424	558736	622320	636400	560592
208	1259072	998416	1178176	1153280	1231360	1236384	1239552	1178784	1286240	1337696	1319872	1266016	1190016	1329408	1239552	1170080	1206272	1291296	1479360	1432032	1408192	1126592	1322400	1339616	1198784	1341536	1398528	1480000	1321760	1225088	1374784	1247712	1165696	1439808	1517184	1450816	1085248	1151392	1329408	1442400	1344064	1240800	1595392	1538144	1290656	1374784	1356864	1353664	1347904
232	2386535	1920015	2301584	2260170	2297093	2523120	2321672	2330656	2403369	2322804	2245634	2269118	2329524	2280294	2359656	2207580	2709926	2556577	2436897	2752508	2577938	2007264	2397781	2487259	2612598	2427984	2439160	2396650	2570087	2476083	2515269	2479478	2261302	2327331	2862144	2598097	2151665	2248994	2179570	2568955	2508479	2186325	2702146	2603685	2350815	2711058	2568955	2541016	2452599
235	4937	5443	5317	4810	5190	5190	4810	5063	6203	5570	3797	5950	5063	3670	4937	5317	7217	6837	5443	6583	7470	4304	4050	5950	5697	4937	4684	6077	5950	6330	5190	5823	4937	5443	5570	5950	6203	5950	4937	6330	3670	6457	6963	6330	4810	6963	5823	6583	7470
238	2470495	2422396	2367578	2475022	2427984	2188588	2477215	2316084	2544340	2502961	2379886	2269118	2479478	2175149	2208712	1920015	2609202	2292601	2452599	2228871	2822958	2513005	2484995	2293733	2516401	2345227	2570087	2422396	2541016	2631554	2297093	2802870	2638344	2603685	2449275	2831870	2436897	2484995	2347419	2689838	2438028	2302716	2554455	2845380	2632686	2520857	2132603	2709926	2596966
replica 16
201	0	203	203	0	0	203	203	0	203	203	407	0	0	0	0	0	203	0	0	0	0	407	203	610	203	407	0	203	0	203	203	814	203	203	407	203	203	610	0	203	610	0	0	407	203	203	203	0	0
204	29983	28143	29574	30188	31210	26713	27530	29165	29983	34687	29779	35915	34482	40623	32232	30596	29165	31005	34482	32437	35301	36324	39599	42671	35710	36733	35301	30392	35710	38985	45129	38575	32028	37142	35505	42261	38985	49844	37552	38780	37347	33460	39394	44720	35505	39394	33255	34482	28552
206	559552	588528	533168	523440	523848	538384	614160	524672	536864	519744	557072	626112	526320	637520	513176	543184	500608	531248	643232	570032	588800	580784	569328	660672	567264	597520	629728	627504	611104	659280	644624	729648	598208	628752	606384	630416	583280	688128	681952	611520	624720	678176	660112	654816	632928	703584	647840	555008	648528
207	550512	495736	520456	534528	545584	503896	538144	516960	523504	567952	520016	616016	475992	521544	556976	525584	501176	474368	563008	550832	528848	529296	522856	579600	603744	580272	592608	532464	592608	644272	581584	655728	564432	561152	567728	561696	568720	607392	560704	576192	581584	598560	614240	566416	573776	607056	631408	583232	604736
208	1267264	1196288	1216928	1321120	1158880	1080960	1264736	1291936	1256544	1300800	1237664	1339616	1343424	1211296	1300160	1166336	1282432	1111136	1306528	1468960	1238912	1135264	1269152	1485216	1465728	1386304	1433344	1337056	1515872	1496288	1377984	1401088	1240160	1308416	1360672	1433984	1360672	1254656	1356864	1578240	1404320	1403040	1407520	1370272	1347264	1310336	1388896	1408192	1377344
232	2086768	2293733	2158350	2400045	2190781	2291469	2273609	2455995	2294865	2533094	2291469	2241143	2396650	2162841	2523120	2217624	2282557	2304909	2376561	2470495	2248994	2400045	2402237	2610334	2615993	2601422	2931462	2484995	2580202	2592509	2519725	2604817	2368710	2278101	2804992	2425792	2554455	2499637	2413413	2577938	2368710	2608071	2454863	2442555	2482732	2369842	2744656	2655037	2745788
235	3291	5063	5063	4937	5190	8611	3924	6077	5823	5570	5190	5950	4810	4557	6077	5570	5063	4684	4937	5063	6203	6077	4810	6457	7470	4810	5570	6837	5317	4810	6457	5317	7597	6710	5570	6457	6837	6330	5317	6330	6203	6203	5697	6203	5823	6330	5697	5950	5317
238	1962561	2036406	2387666	2049845	2291469	2238879	2325068	2552192	2482732	2518664	2367578	2101304	2233327	2028555	2372034	1956973	1996088	2423528	2309400	2510742	2460380	2600290	2114672	2487259	2562236	2609202	2556577	2716646	2593571	2479478	2521989	2780377	2407896	2574614	2929199	2664091	2442555	2891215	2596966	2896732	2491785	2432511	2511874	2742393	2828475	2151665	2599229	2405633	2312725
replica 17
201	203	203	203	203	0	203	203	203	203	0	0	610	0	0	0	0	0	0	0	203	203	0	814	0	0	203	203	203	203	407	0	610	610	407	0	0	203	0	407	0	203	0	0	610	0	0	203	0	203
204	39394	27735	33460	33869	33255	27939	31823	30392	35710	32437	36324	32028	32641	31823	36324	40008	35096	40418	29983	33869	37961	28348	30392	39394	25691	33050	35915	40008	39189	34482	33664	33050	40213	35710	37347	39189	45949	33664	42261	34073	42466	33664	38371	40827	36528	37756	35915	41647	37552
206	605696	488744	543056	573744	551024	502656	666688	454088	651744	572784	632080	584928	645456	539760	616800	733040	612768	629856	536464	707664	568928	574720	550464	660960	554320	573056	638912	606800	624848	672144	704144	630704	697808	752688	683920	687008	732896	589504	615136	615824	692192	613888	729920	689248	621936	599328	564512	644480	620832
207	525472	450248	575760	666416	526992	441624	556864	435160	558944	549088	547984	531152	528528	494760	583120	537600	642064	561040	577296	513152	515440	556544	549520	663296	565312	548752	570704	553792	662400	615792	694336	630192	563344	626528	654832	608608	674448	619440	578400	583024	677120	562240	619552	617456	596352	582912	588736	606288	589072
208	1203168	1101888	1127232	1399168	1293184	1083392	1268512	1084032	1407520	1122880	1288768	1157632	1292576	1247712	1284320	1181280	1565728	1526976	1308416	1136512	1238272	1267264	1243296	1548640	1338336	1370944	1383744	1184416	1477408	1394016	1508032	1537472	1278016	1487168	1467008	1511936	1701888	1310976	1563744	1290016	1399168	1406240	1298912	1602656	1459872	1385664	1388896	1633152	1395328
232	2386535	2457126	2264626	2049845	2586851	1875276	2461512	2116935	2466039	2282557	2417940	2402237	2364183	2468302	2439160	2208712	2661828	2496242	2420204	2499637	2144910	2359656	2370903	2850897	2614861	2801738	2633818	2329524	2670811	2325068	2554455	2966192	2295996	2732278	2364183	2753639	2998588	2498505	2727893	2323936	2620449	2695426	2479478	2675267	2613729	2544340	2404501	2615993	2632686
235	5190	4937	4177	4810	6457	5443	6330	6077	5443	5190	5950	5950	5823	6330	4304	4684	6583	6203	5570	3670	4557	4304	7090	4810	5443	6330	6203	6077	7217	5950	4937	6963	4177	6710	4810	6457	7217	7724	4810	5190	5570	7850	5950	5317	6963	4810	6330	4937	5443
238	2422396	2229932	2221019	2028555	1930094	2080048	2552192	2477215	2549999	2299356	2773728	2606939	2515269	2881100	2574614	2417940	2733410	1992728	2434633	2321672	2486127	2457126	2516401	2159481	2457126	2546604	2398913	2567894	2398913	2335041	2367578	2779245	2455995	2960604	2302716	2421265	2294865	2351946	2599229	2937121	2314988	2610334	2730015	2572351	2939314	2729024	2581192	2429116	2350815
replica 18
201	407	0	203	203	0	1221	203	203	0	203	0	0	0	407	0	203	610	407	203	407	0	407	407	0	203	203	203	203	203	407	203	203	203	407	203	0	0	0	407	0	0	0	203	0	0	203	407	407	203
204	29165	29370	32028	31414	29370	33664	32028	32232	35096	27735	36733	26713	34482	33869	32846	33869	35096	36528	30801	30392	36119	43695	39189	40213	37552	31619	35096	31619	31005	43490	40418	38780	35096	35505	39394	38780	31619	35096	40213	45334	39189	36324	36733	32232	37756	36938	35505	41237	39189
206	516872	508256	620400	429056	643376	503744	524264	544416	583408	502792	606528	545936	546480	559280	521520	503200	621376	572928	564512	552944	563824	655792	656912	679008	652848	561888	628336	637376	647840	685600	669072	731200	678304	606528	681952	701184	630000	592960	671872	759216	655792	642528	556384	612496	593920	667392	577200	626800	672560
207	479568	413544	551600	419664	548544	443128	457592	472960	517072	563888	530160	539888	439360	508576	541312	506400	522856	575312	506616	602192	497584	557856	551504	582576	595360	560928	551392	587648	653392	621760	602528	592928	553248	528096	555664	595680	613024	675008	648160	568832	565872	626976	514240	579712	620112	625536	546464	610048	553024
208	1095104	947552	1076640	995376	1279264	1201280	1088320	1037424	1082784	1328128	1250880	1232000	1063744	1199392	1432032	1168832	1186912	1270432	1276736	1564384	1108672	1227584	1229472	1321120	1399168	1415264	1188160	1346624	1477408	1439168	1389536	1397248	1175680	1173792	1344704	1152640	1395968	1368352	1523072	1260960	1326240	1546656	1245824	1502816	1574944	1654432	1220064	1434624	1349184
232	2166166	1982649	2038634	1994956	2323936	2359656	2351946	2154955	2030818	2436897	2279162	2253486	2213203	2151665	2593571	2585719	2610334	2480610	2191877	2989676	2186325	2255678	2396650	2731146	2789430	2589114	2402237	2340700	2614861	2765947	2374298	2716646	2330656	2531962	2317216	2389930	2470495	2544340	2775991	2130339	2231063	2553323	2381018	2537621	2535357	3007571	2425792	2478346	2416808
235	6330	6077	4557	4810	6457	3291	5950	6330	4684	4937	5570	6077	5443	5190	5823	7217	5823	5697	5570	6837	4304	7090	6077	3670	5317	5697	6457	6710	4557	5570	5190	8611	6330	5570	7344	6203	7217	6583	6710	4810	5823	4557	6963	5063	4684	6203	6710	6710	4430
238	2146042	2263494	1775684	2118032	2209843	2252354	2422396	2396650	2058758	2241143	2464907	2562236	2394457	2393325	2388798	2555587	2514137	2459248	2397781	2753639	2382149	2931462	2511874	2535357	2467170	2586851	2957209	2609202	2320611	2615993	2331787	3044423	2690970	2793887	3036713	2449275	2535357	2553323	2824090	2294865	2473890	2265758	2415677	2585719	2156086	2408886	2657301	2491785	2778255
means and their ratios from the series of individual replicae
	1	2	3	4	5	6	7	8	9	10	11	12	13	14	15	16	17	18		st. dev.				No appreciable covariance between Pb206 and U238 mean intensities based on the replicae																				No appreciable covariance between Pb207 and U235 mean intensities based on the replicae
201	265.68	248.067	279.247	250.787	277.887	233.127	246.667	241.26	230.42	238.553	231.76	257.567	218.213	239.92	244	229.087	206.007	245.347		18.7074			Pb206	585999	584144	583413	575752	588080	580124	583659	581415	596835	584171	581470	588646	575402	586180	581654	583663	586326	585924		Pb207	543356	543837	540021	534272	543002	537417
204	34441.3	34106.3	34271.9	34009.3	33677.5	33650.5	33335.1	33902.8	34575.2	33671.1	33903.2	33788.2	33567.3	34354.5	34328.3	34212.4	34009.1	34010.5		335.639			U238	2.32994e+06	2.30701e+06	2.30949e+06	2.31975e+06	2.30691e+06	2.31939e+06	2.32578e+06	2.31343e+06	2.30923e+06	2.30938e+06	2.31393e+06	2.33355e+06	2.31454e+06	2.31774e+06	2.29988e+06	2.33091e+06	2.35009e+06	2.35414e+06		U238	5581.96	5374.23	5495.81	5514.35	5561.66	5646.97
206	585999	584144	583413	575752	588080	580124	583659	581415	596835	584171	581470	588646	575402	586180	581654	583663	586326	585924		4832.39
207	543356	543837	540021	534272	543002	537417	544789	541415	547105	538105	537686	546716	530313	543948	532495	539441	543531	541352		4727.94
208	1.27744e+06	1.28664e+06	1.28763e+06	1.26828e+06	1.2832e+06	1.27351e+06	1.29688e+06	1.28611e+06	1.27766e+06	1.26745e+06	1.27723e+06	1.28171e+06	1.24637e+06	1.27521e+06	1.25983e+06	1.26788e+06	1.27285e+06	1.26818e+06		11586.5
232	2.25029e+06	2.24967e+06	2.28193e+06	2.26993e+06	2.27368e+06	2.28881e+06	2.2958e+06	2.2998e+06	2.28849e+06	2.25792e+06	2.28759e+06	2.30279e+06	2.27007e+06	2.30459e+06	2.2765e+06	2.28718e+06	2.30161e+06	2.29784e+06		17566.1
235	5581.96	5374.23	5495.81	5514.35	5561.66	5646.97	5598.87	5659.63	5473.87	5564.21	5540.53	5451.95	5534.65	5431.67	5393.59	5569.27	5466.27	5553.24		79.9541
238	2.32994e+06	2.30701e+06	2.30949e+06	2.31975e+06	2.30691e+06	2.31939e+06	2.32578e+06	2.31343e+06	2.30923e+06	2.30938e+06	2.31393e+06	2.33355e+06	2.31454e+06	2.31774e+06	2.29988e+06	2.33091e+06	2.35009e+06	2.35414e+06		14760.4
206/238	0.251508	0.253204	0.252616	0.248196	0.254921	0.25012	0.250952	0.251321	0.258456	0.252956	0.251291	0.252254	0.248603	0.25291	0.252906	0.250401	0.249491	0.248891		0.00246921
207/235	97.3414	101.194	98.2605	96.8876	97.6331	95.1692	97.3033	95.6627	99.9486	96.7083	97.0459	100.279	95.8168	100.144	98.7275	96.8601	99.4336	97.4839		1.72985
uncertainty estimates for mean intensities and their ratios obtained from each individual replica using the differencing method, formula (14), exact variant, and formulae (7,16)
	1	2	3	4	5	6	7	8	9	10	11	12	13	14	15	16	17	18		mean	st. dev.
201	19.2653	20.2956	23.6878	23.1222	21.9396	20.3216	18.9926	21.2309	17.1416	19.4261	16.2113	19.9797	18.1578	20.3597	21.0745	20.0741	18.7963	20.4181		20.0275	1.87112
204	312.324	398.177	302.683	340.787	318.511	317.761	303.899	324.204	283.256	337.845	339.217	349.809	335.132	386.385	331.326	309.174	289.395	307.226		327.062	29.8986
206	3516.91	3908.01	3992.05	4226.25	3897.89	4072.31	4366.6	4048.33	4376.84	4928.27	4243.6	4633.47	4231.08	4321.73	3508.93	4271.7	4245.94	4293.31		4171.29	343.002
207	3347.29	3640.77	3698.09	3060.42	4204.45	3372.98	2909.55	3750.8	3955.52	3742.57	3601.4	3849.67	4066.39	3872.47	3578.47	2931.27	3507.51	3577.05		3592.59	362.932
208	9710.76	10313.5	9177.84	9341.71	10608.3	8875.05	8020.33	8863.81	10667.4	9004.9	8509.87	11528.9	11232.8	10243.7	9792.95	8864.34	9962.52	9994.18		9706.27	954.574
232	13771.6	14220.1	13947.4	12811.2	14283.4	14162.6	13322.2	15489.4	15631.3	13648.3	13528.4	14688.8	17539.3	16440.2	15631.4	13537.4	14345.4	16838.3		14657.6	1318
235	81.0298	87.3324	82.6906	67.4108	87.4279	87.888	81.2453	81.4857	82.107	88.5659	72.2376	85.3758	97.5663	79.1868	81.5126	78.1483	87.2575	86.1933		83.0368	6.63618
238	14863.3	14952.6	15143.1	14546.6	13992.5	13469.6	13921.1	13718.8	15001.9	13855.9	14916.8	15543.8	15332.4	14342.8	16753.7	14222.9	13910.8	14868.1		14630.9	804.213
Cov(206,238)	-1.10948e+07	-2.48044e+07	-8.04947e+06	78147.9	-9.2236e+06	-3.52045e+06	-1.72608e+07	-9.78368e+06	-2.17116e+07	-2.6599e+07	-2.04708e+07	-8.35248e+06	-4.04191e+06	-6.45311e+06	-1.48552e+07	-2.16144e+07	-1.40027e+07	-6.90956e+06
206/238, with cov correction	0.00242501	0.00281476	0.00254832	0.00239463	0.00247576	0.00234946	0.00271713	0.00249042	0.00291826	0.00306278	0.0028123	0.00274585	0.00253554	0.00255616	0.00267254	0.00277225	0.00259042	0.00253329		0.00263416	0.000192792
206/238, without ->>-	0.00220286	0.00235855	0.00239405	0.00239613	0.00229036	0.00227873	0.00240442	0.00229855	0.00253212	0.00261867	0.00244695	0.00260113	0.00246046	0.00243441	0.00239205	0.00238601	0.00233349	0.00240768		0.00240203	0.000107129
Cov(207,235)	-12369.6	-89993.2	30800.1	23744.9	28140.8	-41228	23088.3	30128.2	6575.46	71124	-25073.5	-25027.6	-3176.29	2145.32	-16485.3	-31929.4	-70133	42657.5
207/235, with cov correction	1.55999	1.94773	1.56146	1.24881	1.65812	1.67236	1.45615	1.46843	1.65104	1.54193	1.47716	1.77014	1.84734	1.62026	1.66683	1.52438	1.84333	1.56033		1.61532	0.16668
207/235, without ->>-	1.53502	1.7785	1.62436	1.308	1.71085	1.59709	1.50456	1.52847	1.66427	1.67985	1.42249	1.72178	1.84196	1.62474	1.63292	1.4575	1.71204	1.64448		1.61049	0.132489
uncertainty estimates for mean intensities and their ratios estimated from the individual replicae using the differencing method, formula (14), approximate variant
																				mean	st. dev.
201	19.5988	21.0234	23.7313	23.2943	22.0638	20.9792	19.5033	21.2404	18.1179	19.5052	16.2121	20.1631	18.164	21.023	21.588	20.4846	19.0152	20.485		20.344	1.83747
204	342.401	403.937	303.761	341.279	321.622	322.329	304.301	334.12	290.485	340.351	342.107	351.182	338.018	396.74	333.407	313.908	293.437	314.124		332.639	30.4467
206	4067.86	4196.57	4048.78	4264.71	4099.95	4213.34	4471.62	4115.79	4402.63	4946.36	4336.7	4636.2	4280.99	4445.67	3592.66	4291.05	4299.04	4306.84		4278.71	276.154
207	3603.51	3712.23	3805.99	3207.3	4345.77	3504.29	2944.96	3761.94	3989.77	3755.6	3642.22	3874.38	4083.85	3910.69	3582.29	2958.41	3561.75	3614.31		3658.85	356.867
208	10172	10347	9801.25	9631.21	10703.1	9348.12	8090.35	9006.14	10742.4	9029.2	8818.87	11808.6	11474.9	10265.8	9814.51	8928.69	10103.3	9995.42		9893.37	947.843
232	13802.7	14332.6	14082.4	13172	14376.5	15872.5	13404.4	15513.4	15696.7	13656.4	14064.6	15092.6	17666.8	16783.6	15672.7	13553.6	14564.3	16969.2		14904.3	1327.01
235	81.198	87.9801	85.2016	72.438	88.8933	90.863	81.2863	83.5767	82.1246	89.6754	72.6422	87.3892	98.0373	81.7832	81.7382	78.7533	87.468	86.5326		84.3101	6.25409
238	15292.9	15184.8	15196.6	14595.2	14184.8	13957.6	14041.2	13832.8	15218.4	13990.7	15755.3	15846.3	16214.8	15490.2	16886.1	14236.7	14100.5	15294.3		14962.2	888.953
[truncated: 485 more columns]
